# Supplementary material for: Tomato seed extract promotes health of the gut microbiota and demonstrates a potential new way to valorize tomato waste
Source: PubMed Central journal article supplement (PMC11020900; doi:10.1371/journal.pone.0301381), 2024-04-16

Figure S2

| Family                     | Genus                       | CON     |         |         |         |         |         | TSE     |         |         |         |         |         |
|----------------------------|-----------------------------|---------|---------|---------|---------|---------|---------|---------|---------|---------|---------|---------|---------|
|                            |                             | Donor 1 | Donor 2 | Donor 3 | Donor 4 | Donor 5 | Donor 6 | Donor 1 | Donor 2 | Donor 3 | Donor 4 | Donor 5 | Donor 6 |
| Bifidobacteriaceae         | Bifidobacterium             | 21.17   | 22.23   | 24.01   | 19.27   | 18.55   | 23.03   | 33.57   | 51.61   | 41.12   | 37.10   | 26.99   | 46.93   |
| Bacteroidaceae             | Bacteroides                 | 12.26   | 17.68   | 23.88   | 10.90   | 27.10   | 11.08   | 5.43    | 6.10    | 15.02   | 11.36   | 20.57   | 4.39    |
| Enterobacteriaceae         | Escherichia                 | 13.66   | 0.00    | 10.61   | 17.36   | 7.96    | 25.42   | 20.79   | 0.00    | 12.12   | 18.51   | 4.12    | 16.02   |
| Bacteroidales unclassified | Phocaeicola                 | 7.53    | 12.31   | 3.26    | 5.75    | 3.62    | 6.94    | 12.43   | 10.02   | 3.52    | 1.52    | 6.08    | 3.84    |
| Tannerellaceae             | Parabacteroides             | 5.64    | 4.17    | 2.71    | 2.55    | 6.07    | 4.31    | 8.20    | 3.98    | 7.49    | 1.16    | 4.10    | 4.95    |
| Coriobacteriaceae          | Collinsella                 | 2.11    | 5.34    | 1.89    | 0.99    | 0.00    | 1.56    | 3.15    | 2.91    | 1.68    | 0.78    | 0.05    | 0.38    |
| Lachnospiraceae            | Enterocloster               | 1.50    | 2.80    | 1.56    | 1.37    | 2.80    | 0.63    | 2.82    | 2.19    | 1.12    | 1.03    | 1.81    | 2.01    |
| Eubacteriaceae             | Eubacterium                 | 1.93    | 0.00    | 0.00    | 0.00    | 1.32    | 0.21    | 2.07    | 0.00    | 0.00    | 0.00    | 0.04    | 0.00    |
| Lachnospiraceae            | Dorea                       | 2.35    | 1.77    | 3.47    | 3.22    | 0.88    | 1.96    | 1.70    | 0.38    | 2.57    | 0.75    | 0.42    | 1.64    |
| Rikenellaceae              | Alistipes                   | 2.27    | 1.66    | 4.33    | 4.51    | 1.40    | 1.27    | 1.59    | 1.56    | 1.95    | 3.75    | 1.73    | 0.97    |
| Ruminococcaceae            | Ruminococcus                | 5.28    | 0.80    | 1.03    | 1.15    | 0.00    | 0.03    | 1.29    | 0.29    | 0.54    | 0.36    | 0.00    | 0.02    |
| Clostridiaceae             | Clostridium                 | 1.74    | 5.35    | 0.49    | 1.30    | 0.46    | 0.39    | 1.00    | 4.50    | 0.26    | 1.02    | 0.53    | 0.33    |
| Lachnospiraceae            | Blautia                     | 0.95    | 1.20    | 0.03    | 1.76    | 0.51    | 0.24    | 0.99    | 0.11    | 0.00    | 0.80    | 0.86    | 0.05    |
| Ruminococcaceae            | Gemmiger                    | 2.49    | 0.34    | 1.99    | 4.37    | 3.70    | 0.19    | 0.80    | 0.17    | 0.13    | 6.95    | 2.88    | 0.08    |
| Lachnospiraceae            | Roseburia                   | 1.46    | 0.03    | 0.00    | 0.12    | 0.00    | 0.02    | 0.41    | 0.00    | 0.00    | 0.01    | 0.00    | 0.05    |
| Veillonellaceae            | Veillonella                 | 0.80    | 0.00    | 0.84    | 0.00    | 0.00    | 2.06    | 0.29    | 0.25    | 2.40    | 0.00    | 0.08    | 3.28    |
| Enterobacteriaceae         | Citrobacter                 | 0.00    | 5.40    | 3.88    | 0.00    | 0.00    | 0.00    | 0.28    | 5.41    | 5.90    | 0.00    | 0.00    | 0.00    |
| Lachnospiraceae            | Lacrimispora                | 1.12    | 0.08    | 0.51    | 0.48    | 0.88    | 3.54    | 0.25    | 0.17    | 0.04    | 0.19    | 0.49    | 1.18    |
| Prevotellaceae             | Paraprevotella              | 1.61    | 0.00    | 0.00    | 0.00    | 0.00    | 0.00    | 0.21    | 0.00    | 0.00    | 0.00    | 0.00    | 0.00    |
| Lachnospiraceae            | Mediterraneibacter          | 0.26    | 0.36    | 0.00    | 0.00    | 1.40    | 0.57    | 0.10    | 0.28    | 0.00    | 0.00    | 0.52    | 0.23    |
| Ruminococcaceae            | GGB9633                     | 0.22    | 1.45    | 0.00    | 1.70    | 0.00    | 0.00    | 0.10    | 0.19    | 0.00    | 0.66    | 0.00    | 0.00    |
| Acidaminococcaceae         | Phascolarctobacterium       | 0.10    | 0.09    | 0.90    | 0.00    | 2.61    | 0.00    | 0.00    | 0.12    | 1.08    | 0.00    | 2.19    | 0.00    |
| Bacteroidaceae             | unclassified                | 0.00    | 0.00    | 0.00    | 0.00    | 0.00    | 3.72    | 0.00    | 0.00    | 0.00    | 0.00    | 0.00    | 1.48    |
| Prevotellaceae             | GGB1270                     | 0.00    | 1.29    | 0.00    | 0.00    | 2.60    | 0.00    | 0.00    | 2.89    | 0.00    | 0.00    | 0.16    | 0.00    |
| Sutterellaceae             | Sutterella                  | 0.00    | 1.22    | 1.70    | 0.38    | 0.00    | 1.95    | 0.00    | 0.95    | 1.35    | 0.55    | 0.00    | 2.70    |
| Clostridia_unclassified    | Clostridia unclassified     | 0.11    | 0.00    | 0.20    | 0.95    | 0.40    | 1.13    | 0.00    | 0.00    | 0.00    | 0.54    | 0.26    | 0.00    |
| Clostridia_unclassified    | GGB3817                     | 0.00    | 1.04    | 0.00    | 0.00    | 0.00    | 0.00    | 0.00    | 0.00    | 0.00    | 0.00    | 0.00    | 0.00    |
| Clostridiaceae             | Clostridiaceae unclassified | 1.93    | 2.22    | 1.94    | 1.74    | 2.84    | 0.37    | 0.00    | 0.00    | 0.00    | 0.34    | 0.19    | 0.01    |
| Clostridiales unclassified | Evtopia                     | 1.13    | 1.05    | 0.00    | 0.00    | 0.27    | 0.00    | 0.00    | 0.00    | 0.00    | 0.00    | 0.29    | 0.00    |
| Lachnospiraceae            | Fusicatenibacter            | 0.00    | 0.14    | 0.20    | 1.73    | 4.13    | 0.14    | 0.00    | 0.00    | 0.00    | 1.96    | 16.92   | 0.04    |
| Oscillospiraceae           | Dysosmobacter               | 1.57    | 1.77    | 1.10    | 1.59    | 1.14    | 0.11    | 0.00    | 0.00    | 0.00    | 1.28    | 0.97    | 0.00    |
| Oscillospiraceae           | Oscillibacter               | 0.32    | 0.37    | 0.98    | 2.14    | 1.19    | 0.38    | 0.00    | 0.00    | 0.00    | 0.88    | 0.48    | 0.00    |
| Ruminococcaceae            | Faecalibacterium            | 0.64    | 0.17    | 0.72    | 2.22    | 0.43    | 0.65    | 0.00    | 0.00    | 0.04    | 1.04    | 0.26    | 0.00    |
| Ruminococcaceae            | Flavonifractor              | 0.60    | 0.09    | 0.26    | 1.48    | 0.07    | 0.08    | 0.00    | 0.00    | 0.00    | 0.66    | 0.21    | 0.02    |
| Ruminococcaceae            | GGB9621                     | 0.00    | 1.33    | 0.00    | 0.00    | 0.00    | 0.06    | 0.00    | 0.00    | 0.00    | 0.00    | 0.00    | 0.00    |
| Ruminococcaceae            | GGB9632                     | 0.28    | 0.00    | 2.67    | 0.35    | 0.00    | 0.05    | 0.00    | 0.00    | 0.10    | 0.33    | 0.00    | 0.00    |
| Ruminococcaceae            | GGB9634                     | 0.00    | 0.10    | 0.00    | 0.00    | 1.60    | 0.00    | 0.00    | 0.00    | 0.00    | 0.00    | 0.00    | 0.00    |
| Ruminococcaceae            | GGB9644                     | 0.00    | 0.00    | 0.81    | 1.21    | 0.00    | 0.00    | 0.00    | 0.00    | 0.19    | 0.62    | 0.00    | 0.00    |
| Coriobacteriaceae          | Senegalimassilia            | 0.00    | 0.30    | 0.00    | 0.00    | 1.28    | 0.14    | 0.00    | 0.37    | 0.00    | 0.00    | 0.72    | 0.20    |
| Eggerthellaceae            | Eggerthella                 | 0.00    | 0.00    | 0.15    | 0.03    | 1.19    | 0.00    | 0.00    | 0.00    | 0.07    | 0.05    | 0.51    | 0.03    |
| Enterococcaceae            | Enterococcus                | 0.00    | 0.93    | 0.00    | 0.00    | 0.00    | 4.73    | 0.00    | 1.31    | 0.00    | 0.00    | 0.00    | 4.68    |
| Akkermansiaceae            | Akkermansia                 | 0.00    | 0.00    | 0.11    | 1.86    | 0.14    | 0.05    | 0.00    | 0.00    | 0.00    | 1.18    | 0.13    | 0.06    |
|                            | other                       | 6.96    | 4.92    | 3.78    | 7.53    | 3.45    | 2.97    | 2.53    | 4.24    | 1.31    | 4.64    | 5.46    | 4.43    |

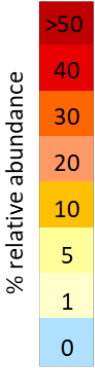

Supplement: pone.0301381.s002.pdf [file pone.0301381.s002.pdf]
