# Supplementary material for: Tomato seed extract promotes health of the gut microbiota and demonstrates a potential new way to valorize tomato waste
Source: PubMed Central journal article supplement (PMC11020900; doi:10.1371/journal.pone.0301381), 2024-04-16

Figure S1

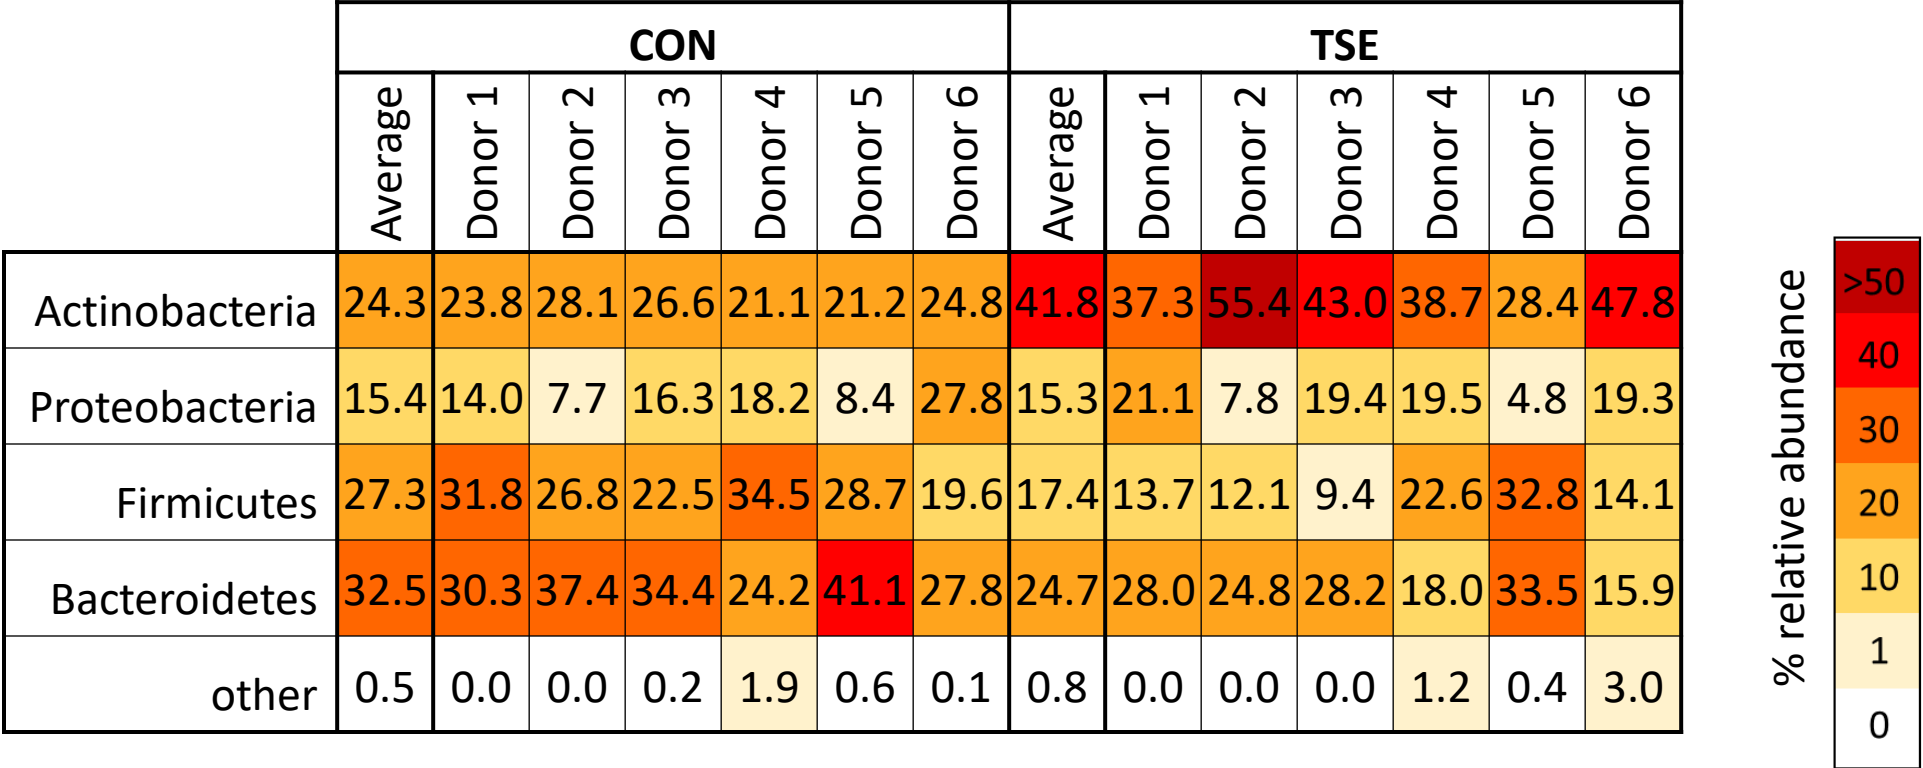

Supplement: pone.0301381.s001.pdf [file pone.0301381.s001.pdf]
