# Supplementary material for: Tomato seed extract promotes health of the gut microbiota and demonstrates a potential new way to valorize tomato waste
Source: PubMed Central journal article supplement (PMC11020900; doi:10.1371/journal.pone.0301381), 2024-04-16
Supplement: pone.0301381.s004.pdf [file pone.0301381.s004.pdf]

**Figure S4**

|               |             |                  |                         | Donor 1 |      | Donor 2 |      | Donor 3 |      | Donor 4 |      | Donor 5 |      | Donor 6 |      |      |      |
|---------------|-------------|------------------|-------------------------|---------|------|---------|------|---------|------|---------|------|---------|------|---------|------|------|------|
| phylum        | class       | family           | genus                   | CON     | TSE  | CON     | TSE  | CON     | TSE  | CON     | TSE  | CON     | TSE  | CON     | TSE  |      |      |
| Firmicutes    | Clostridia  | Clostridiaceae   | <i>Butyricicoccus</i>   | 0.00    | 0.00 | 0.00    | 0.00 | 0.04    | 0.00 | 0.00    | 0.00 | 0.12    | 0.11 | 0.00    | 0.00 |      |      |
|               |             |                  | <i>Clostridium</i>      | 1.74    | 1.00 | 5.35    | 4.50 | 0.49    | 0.26 | 1.30    | 1.02 | 0.46    | 0.53 | 0.39    | 0.33 |      |      |
|               |             | Eubacteriaceae   | <i>Eubacterium</i>      | 1.93    | 2.07 | 0.00    | 0.00 | 0.00    | 0.00 | 0.00    | 0.00 | 0.00    | 0.00 | 1.32    | 0.04 | 0.21 | 0.00 |
|               |             | Lachnospiraceae  | <i>Anaerobutyricum</i>  | 0.09    | 0.00 | 0.00    | 0.19 | 0.00    | 0.00 | 0.01    | 0.02 | 0.00    | 0.34 | 0.00    | 0.00 |      |      |
|               |             |                  | <i>Anaerostipes</i>     | 0.05    | 0.00 | 0.00    | 0.00 | 0.00    | 0.00 | 0.11    | 0.23 | 0.00    | 0.05 | 0.00    | 0.00 |      |      |
|               |             |                  | <i>Coprococcus</i>      | 0.00    | 0.00 | 0.00    | 0.00 | 0.00    | 0.00 | 0.28    | 0.07 | 0.00    | 0.00 | 0.02    | 0.00 |      |      |
|               |             |                  | <i>Roseburia</i>        | 1.46    | 0.41 | 0.03    | 0.00 | 0.00    | 0.00 | 0.12    | 0.01 | 0.00    | 0.00 | 0.02    | 0.05 |      |      |
|               |             | Ruminococcaceae  | <i>Anaerotruncus</i>    | 0.07    | 0.00 | 0.00    | 0.01 | 0.01    | 0.00 | 0.15    | 0.11 | 0.05    | 0.02 | 0.00    | 0.00 |      |      |
|               |             |                  | <i>Faecalibacterium</i> | 0.64    | 0.00 | 0.17    | 0.00 | 0.72    | 0.04 | 2.22    | 1.04 | 0.43    | 0.26 | 0.65    | 0.00 |      |      |
|               |             |                  | <i>Ruminococcus</i>     | 5.28    | 1.29 | 0.80    | 0.29 | 1.03    | 0.54 | 1.15    | 0.36 | 0.00    | 0.00 | 0.03    | 0.02 |      |      |
| Bacteroidetes | Bacteroidia | Odoribacteraceae | <i>Butyricimonas</i>    | 0.00    | 0.00 | 0.00    | 0.00 | 0.00    | 0.00 | 0.01    | 0.03 | 0.00    | 0.13 | 0.00    | 0.05 |      |      |
|               |             |                  | Sum                     | 11.26   | 4.77 | 6.35    | 4.99 | 2.29    | 0.84 | 5.36    | 2.88 | 2.38    | 1.47 | 1.32    | 0.45 |      |      |
