# Supplementary material for: Tomato seed extract promotes health of the gut microbiota and demonstrates a potential new way to valorize tomato waste
Source: PubMed Central journal article supplement (PMC11020900; doi:10.1371/journal.pone.0301381), 2024-04-16
Supplement: pone.0301381.s005.pdf [file pone.0301381.s005.pdf]

## Raw Reads

| <b>SRA accession</b>        | <b>BioSample</b> | <b>NumberReadPairs</b> | <b>SampleName</b> | <b>Treatment</b> | <b>Donor</b> |
|-----------------------------|------------------|------------------------|-------------------|------------------|--------------|
| <a href="#">SRR24307473</a> | SAMN34376075     | 1016639                | sample_1          | Blank            | 1            |
| <a href="#">SRR24307472</a> | SAMN34376076     | 397373                 | sample_2          | Blank            | 2            |
| <a href="#">SRR24307461</a> | SAMN34376077     | 887204                 | sample_3          | Blank            | 3            |
| <a href="#">SRR24307450</a> | SAMN34376078     | 1103012                | sample_4          | Blank            | 4            |
| <a href="#">SRR24307414</a> | SAMN34376079     | 902432                 | sample_5          | Blank            | 5            |
| <a href="#">SRR24307403</a> | SAMN34376080     | 617160                 | sample_6          | Blank            | 6            |
| <a href="#">SRR24307443</a> | SAMN34376081     | 1113508                | sample_7          | NSC              | 1            |
| <a href="#">SRR24307463</a> | SAMN34376093     | 1584740                | sample_19         | NSC              | 2            |
| <a href="#">SRR24307449</a> | SAMN34376105     | 1254764                | sample_31         | NSC              | 3            |
| <a href="#">SRR24307411</a> | SAMN34376117     | 1180317                | sample_43         | NSC              | 4            |
| <a href="#">SRR24307398</a> | SAMN34376129     | 692718                 | sample_55         | NSC              | 5            |
| <a href="#">SRR24307436</a> | SAMN34376141     | 3168736                | sample_67         | NSC              | 6            |
| <a href="#">SRR24307432</a> | SAMN34376082     | 571054                 | sample_8          | Product 01       | 1            |
| <a href="#">SRR24307462</a> | SAMN34376094     | 1768494                | sample_20         | Product 01       | 2            |
| <a href="#">SRR24307448</a> | SAMN34376106     | 759313                 | sample_32         | Product 01       | 3            |
| <a href="#">SRR24307410</a> | SAMN34376118     | 2694373                | sample_44         | Product 01       | 4            |
| <a href="#">SRR24307397</a> | SAMN34376130     | 2761528                | sample_56         | Product 01       | 5            |
| <a href="#">SRR24307435</a> | SAMN34376142     | 9954234                | sample_68         | Product 01       | 6            |
