# Supplementary material for: Tomato seed extract promotes health of the gut microbiota and demonstrates a potential new way to valorize tomato waste
Source: PubMed Central journal article supplement (PMC11020900; doi:10.1371/journal.pone.0301381), 2024-04-16
Supplement: pone.0301381.s006.pdf [file pone.0301381.s006.pdf]

| chem                                 | variable                             | Spearman | pval     | padj     |
|--------------------------------------|--------------------------------------|----------|----------|----------|
| s__Bifidobacterium_adolescentis      | s__Bifidobacterium_adolescentis      | 1        | 0        | 0        |
| s__Bifidobacterium_bifidum           | s__Bifidobacterium_adolescentis      | -0.27043 | 0.395258 | 0.520077 |
| s__Bifidobacterium_catenuatum        | s__Bifidobacterium_adolescentis      | 0.27293  | 0.390731 | 0.520077 |
| s__Bifidobacterium_longum            | s__Bifidobacterium_adolescentis      | -0.37762 | 0.227443 | 0.437391 |
| s__Bifidobacterium_pseudocatenulatum | s__Bifidobacterium_adolescentis      | -0.55525 | 0.06092  | 0.16154  |
| s__Bifidobacterium_adolescentis      | s__Bifidobacterium_bifidum           | -0.27043 | 0.395258 | 0.520077 |
| s__Bifidobacterium_bifidum           | s__Bifidobacterium_bifidum           | 1        | 0        | 0        |
| s__Bifidobacterium_catenuatum        | s__Bifidobacterium_bifidum           | 0.538169 | 0.071078 | 0.16154  |
| s__Bifidobacterium_longum            | s__Bifidobacterium_bifidum           | 0.81545  | 0.001226 | 0.004377 |
| s__Bifidobacterium_pseudocatenulatum | s__Bifidobacterium_bifidum           | 0.110114 | 0.733349 | 0.733349 |
| s__Bifidobacterium_adolescentis      | s__Bifidobacterium_catenuatum        | 0.27293  | 0.390731 | 0.520077 |
| s__Bifidobacterium_bifidum           | s__Bifidobacterium_catenuatum        | 0.538169 | 0.071078 | 0.16154  |
| s__Bifidobacterium_catenuatum        | s__Bifidobacterium_catenuatum        | 1        | 0        | 0        |
| s__Bifidobacterium_longum            | s__Bifidobacterium_catenuatum        | 0.187152 | 0.560273 | 0.608992 |
| s__Bifidobacterium_pseudocatenulatum | s__Bifidobacterium_catenuatum        | -0.34133 | 0.277547 | 0.462578 |
| s__Bifidobacterium_adolescentis      | s__Bifidobacterium_longum            | -0.37762 | 0.227443 | 0.437391 |
| s__Bifidobacterium_bifidum           | s__Bifidobacterium_longum            | 0.81545  | 0.001226 | 0.004377 |
| s__Bifidobacterium_catenuatum        | s__Bifidobacterium_longum            | 0.187152 | 0.560273 | 0.608992 |
| s__Bifidobacterium_longum            | s__Bifidobacterium_longum            | 1        | 0        | 0        |
| s__Bifidobacterium_pseudocatenulatum | s__Bifidobacterium_longum            | 0.209998 | 0.512415 | 0.608992 |
| s__Bifidobacterium_adolescentis      | s__Bifidobacterium_pseudocatenulatum | -0.55525 | 0.06092  | 0.16154  |
| s__Bifidobacterium_bifidum           | s__Bifidobacterium_pseudocatenulatum | 0.110114 | 0.733349 | 0.733349 |
| s__Bifidobacterium_catenuatum        | s__Bifidobacterium_pseudocatenulatum | -0.34133 | 0.277547 | 0.462578 |
| s__Bifidobacterium_longum            | s__Bifidobacterium_pseudocatenulatum | 0.209998 | 0.512415 | 0.608992 |
| s__Bifidobacterium_pseudocatenulatum | s__Bifidobacterium_pseudocatenulatum | 1        | 0        | 0        |
