# Supplementary material for: Tomato seed extract promotes health of the gut microbiota and demonstrates a potential new way to valorize tomato waste
Source: PubMed Central journal article supplement (PMC11020900; doi:10.1371/journal.pone.0301381), 2024-04-16
Supplement: pone.0301381.s007.pdf [file pone.0301381.s007.pdf]

| chem                                 | variable                                   | Spearman     | pval        | padj        |
|--------------------------------------|--------------------------------------------|--------------|-------------|-------------|
| s__Bifidobacterium_pseudocatenulatum | s__Acidaminococcaceae_unclassified_SGB5785 | -0.462515839 | 0.130027565 | 0.598875359 |
| s__Bifidobacterium_catenulatum       | s__Acidaminococcaceae_unclassified_SGB5785 | -0.460600651 | 0.131835287 | 0.59975911  |
| s__Bifidobacterium_bifidum           | s__Acidaminococcaceae_unclassified_SGB5785 | -0.147446353 | 0.647458259 | 0.828923516 |
| s__Bifidobacterium_longum            | s__Acidaminococcaceae_unclassified_SGB5785 | 0.06425264   | 0.842745428 | 0.921752812 |
| s__Bifidobacterium_adolescentis      | s__Acidaminococcaceae_unclassified_SGB5785 | 0.293726353  | 0.35411323  | 0.669943949 |
| s__Bifidobacterium_pseudocatenulatum | s__Adlercreutzia_equolifaciens             | -0.173461261 | 0.589791164 | 0.795634689 |
| s__Bifidobacterium_catenulatum       | s__Adlercreutzia_equolifaciens             | 0.088944264  | 0.783406185 | 0.887356966 |
| s__Bifidobacterium_adolescentis      | s__Adlercreutzia_equolifaciens             | 0.311798927  | 0.323838252 | 0.660447962 |
| s__Bifidobacterium_bifidum           | s__Adlercreutzia_equolifaciens             | 0.314924434  | 0.318751156 | 0.660447962 |
| s__Bifidobacterium_longum            | s__Adlercreutzia_equolifaciens             | 0.587342165  | 0.044641193 | 0.564498291 |
| s__Bifidobacterium_pseudocatenulatum | s__Agathobaculum_butyriciproducens         | -0.015876016 | 0.960943243 | 0.973217602 |
| s__Bifidobacterium_adolescentis      | s__Agathobaculum_butyriciproducens         | 0.132565948  | 0.681287848 | 0.828923516 |
| s__Bifidobacterium_longum            | s__Agathobaculum_butyriciproducens         | 0.35870786   | 0.252199305 | 0.645261321 |
| s__Bifidobacterium_bifidum           | s__Agathobaculum_butyriciproducens         | 0.426823404  | 0.166424652 | 0.645261321 |
| s__Bifidobacterium_catenulatum       | s__Agathobaculum_butyriciproducens         | 0.765217391  | 0.003729311 | 0.223758646 |
| s__Bifidobacterium_adolescentis      | s__Akkermansia_muciniphila                 | -0.59717292  | 0.040342536 | 0.564498291 |
| s__Bifidobacterium_pseudocatenulatum | s__Akkermansia_muciniphila                 | -0.437007128 | 0.155451387 | 0.635937491 |
| s__Bifidobacterium_bifidum           | s__Akkermansia_muciniphila                 | 0.13323205   | 0.679761391 | 0.828923516 |
| s__Bifidobacterium_longum            | s__Akkermansia_muciniphila                 | 0.223939845  | 0.484123846 | 0.734984411 |
| s__Bifidobacterium_pseudocatenulatum | s__Akkermansia_muciniphila                 | 0.786464174  | 0.002412391 | 0.178800746 |
| s__Bifidobacterium_adolescentis      | s__Akkermansia_sp_KLE1605                  | -0.218356573 | 0.49536676  | 0.734984411 |
| s__Bifidobacterium_pseudocatenulatum | s__Akkermansia_sp_KLE1605                  | -0.133366267 | 0.679453948 | 0.828923516 |
| s__Bifidobacterium_catenulatum       | s__Akkermansia_sp_KLE1605                  | 0.340889327  | 0.278214762 | 0.660447962 |
| s__Bifidobacterium_bifidum           | s__Akkermansia_sp_KLE1605                  | 0.363748857  | 0.24510805  | 0.645261321 |
| s__Bifidobacterium_longum            | s__Akkermansia_sp_KLE1605                  | 0.480384461  | 0.113937412 | 0.596315484 |
| s__Bifidobacterium_catenulatum       | s__Alistipes_communis                      | -0.281219964 | 0.375909333 | 0.702965264 |
| s__Bifidobacterium_pseudocatenulatum | s__Alistipes_communis                      | -0.169362259 | 0.598744192 | 0.79832559  |
| s__Bifidobacterium_bifidum           | s__Alistipes_communis                      | 0.087522795  | 0.786796659 | 0.889115507 |
| s__Bifidobacterium_longum            | s__Alistipes_communis                      | 0.227671102  | 0.476675824 | 0.734984411 |
| s__Bifidobacterium_adolescentis      | s__Alistipes_communis                      | 0.276707955  | 0.383939601 | 0.706464564 |
| s__Bifidobacterium_bifidum           | s__Alistipes_dispar                        | 0.032765856  | 0.91948059  | 0.952796005 |
| s__Bifidobacterium_longum            | s__Alistipes_dispar                        | 0.036715794  | 0.909806933 | 0.952796005 |
| s__Bifidobacterium_catenulatum       | s__Alistipes_dispar                        | 0.05117785   | 0.874493305 | 0.939353422 |
| s__Bifidobacterium_adolescentis      | s__Alistipes_dispar                        | 0.100968434  | 0.754869662 | 0.872601628 |
| s__Bifidobacterium_pseudocatenulatum | s__Alistipes_dispar                        | 0.303672015  | 0.337271782 | 0.662967933 |
| s__Bifidobacterium_pseudocatenulatum | s__Alistipes_finegoldii                    | -0.608695652 | 0.035688372 | 0.564498291 |
| s__Bifidobacterium_adolescentis      | s__Alistipes_finegoldii                    | 0.338131824  | 0.28237257  | 0.660447962 |
| s__Bifidobacterium_catenulatum       | s__Alistipes_finegoldii                    | 0.349272356  | 0.265791271 | 0.660447962 |
| s__Bifidobacterium_longum            | s__Alistipes_finegoldii                    | 0.516095942  | 0.085853444 | 0.578477748 |
| s__Bifidobacterium_bifidum           | s__Alistipes_finegoldii                    | 0.516689463  | 0.085431014 | 0.578477748 |
| s__Bifidobacterium_adolescentis      | s__Alistipes_ihumii                        | -0.304121881 | 0.336520417 | 0.662524571 |
| s__Bifidobacterium_pseudocatenulatum | s__Alistipes_ihumii                        | 0.317520323  | 0.314559718 | 0.660447962 |
| s__Bifidobacterium_catenulatum       | s__Alistipes_ihumii                        | 0.365217391  | 0.243064593 | 0.645261321 |
| s__Bifidobacterium_longum            | s__Alistipes_ihumii                        | 0.701819726  | 0.010957379 | 0.527898179 |
| s__Bifidobacterium_bifidum           | s__Alistipes_ihumii                        | 0.881483116  | 0.000150445 | 0.023695102 |
| s__Bifidobacterium_longum            | s__Alistipes_indistinctus                  | -0.44058953  | 0.151703802 | 0.634727557 |
| s__Bifidobacterium_pseudocatenulatum | s__Alistipes_indistinctus                  | -0.322359524 | 0.30682795  | 0.660447962 |
| s__Bifidobacterium_bifidum           | s__Alistipes_indistinctus                  | -0.038226832 | 0.906109206 | 0.950622481 |
| s__Bifidobacterium_adolescentis      | s__Alistipes_indistinctus                  | 0.477305324  | 0.11661097  | 0.596315484 |
| s__Bifidobacterium_catenulatum       | s__Alistipes_indistinctus                  | 0.573191921  | 0.051382873 | 0.564498291 |
| s__Bifidobacterium_adolescentis      | s__Alistipes_inops                         | -0.295656198 | 0.350811021 | 0.669943949 |
| s__Bifidobacterium_catenulatum       | s__Alistipes_inops                         | -0.02997184  | 0.926329449 | 0.952796005 |
| s__Bifidobacterium_pseudocatenulatum | s__Alistipes_inops                         | 0.24624379   | 0.440405169 | 0.724609819 |
| s__Bifidobacterium_longum            | s__Alistipes_inops                         | 0.381665274  | 0.220867467 | 0.645261321 |
| s__Bifidobacterium_bifidum           | s__Alistipes_inops                         | 0.524499988  | 0.080002751 | 0.564498291 |
| s__Bifidobacterium_adolescentis      | s__Alistipes_onderdonkii                   | -0.767624669 | 0.003557617 | 0.223758646 |
| s__Bifidobacterium_catenulatum       | s__Alistipes_onderdonkii                   | -0.141355929 | 0.661234707 | 0.828923516 |
| s__Bifidobacterium_bifidum           | s__Alistipes_onderdonkii                   | 0.43574569   | 0.156784896 | 0.639317052 |
| s__Bifidobacterium_longum            | s__Alistipes_onderdonkii                   | 0.577479108  | 0.049269593 | 0.564498291 |
| s__Bifidobacterium_pseudocatenulatum | s__Alistipes_onderdonkii                   | 0.595016478  | 0.041259165 | 0.564498291 |
| s__Bifidobacterium_adolescentis      | s__Alistipes_putredinis                    | -0.230769231 | 0.470905694 | 0.734984411 |
| s__Bifidobacterium_pseudocatenulatum | s__Alistipes_putredinis                    | -0.1210156   | 0.707927241 | 0.844685913 |
| s__Bifidobacterium_catenulatum       | s__Alistipes_putredinis                    | -0.054585979 | 0.866199571 | 0.935005102 |
| s__Bifidobacterium_bifidum           | s__Alistipes_putredinis                    | 0.57830387   | 0.048870169 | 0.564498291 |
| s__Bifidobacterium_longum            | s__Alistipes_putredinis                    | 0.706293706  | 0.013286114 | 0.527898179 |
| s__Bifidobacterium_pseudocatenulatum | s__Alistipes_shahii                        | -0.163726989 | 0.611136332 | 0.80885691  |
| s__Bifidobacterium_adolescentis      | s__Alistipes_shahii                        | -0.125874126 | 0.699712221 | 0.838058363 |
| s__Bifidobacterium_longum            | s__Alistipes_shahii                        | 0.272727273  | 0.391232746 | 0.708266178 |
| s__Bifidobacterium_catenulatum       | s__Alistipes_shahii                        | 0.46008182   | 0.132327804 | 0.59975911  |

|                                      |                                   |              |             |             |
|--------------------------------------|-----------------------------------|--------------|-------------|-------------|
| s__Bifidobacterium_bifidum           | s__Alistipes_shahii               | 0.478452842  | 0.115609817 | 0.596315484 |
| s__Bifidobacterium_catenuatum        | s__Alistipes_sp_AF17_16           | -0.301560013 | 0.340811332 | 0.66474037  |
| s__Bifidobacterium_adolescentis      | s__Alistipes_sp_AF17_16           | -0.24962757  | 0.433944309 | 0.724609819 |
| s__Bifidobacterium_bifidum           | s__Alistipes_sp_AF17_16           | -0.121287129 | 0.707297403 | 0.844685913 |
| s__Bifidobacterium_longum            | s__Alistipes_sp_AF17_16           | 0.095690568  | 0.76736296  | 0.87977919  |
| s__Bifidobacterium_pseudocatenulatum | s__Alistipes_sp_AF17_16           | 0.796209992  | 0.001943856 | 0.163283899 |
| s__Bifidobacterium_longum            | s__Allisonella_histaminiformans   | -0.650443636 | 0.022008557 | 0.527898179 |
| s__Bifidobacterium_pseudocatenulatum | s__Allisonella_histaminiformans   | -0.525320086 | 0.079446787 | 0.564498291 |
| s__Bifidobacterium_bifidum           | s__Allisonella_histaminiformans   | -0.307024383 | 0.33169446  | 0.660447962 |
| s__Bifidobacterium_adolescentis      | s__Allisonella_histaminiformans   | 0.440796513  | 0.151489057 | 0.634727557 |
| s__Bifidobacterium_catenuatum        | s__Allisonella_histaminiformans   | 0.479549435  | 0.114658408 | 0.596315484 |
| s__Bifidobacterium_bifidum           | s__Anaerobutyricum_hallii         | -0.088148312 | 0.785304261 | 0.888225645 |
| s__Bifidobacterium_longum            | s__Anaerobutyricum_hallii         | -0.007797997 | 0.980811173 | 0.984718787 |
| s__Bifidobacterium_pseudocatenulatum | s__Anaerobutyricum_hallii         | 0.027783028  | 0.931698023 | 0.954847805 |
| s__Bifidobacterium_catenuatum        | s__Anaerobutyricum_hallii         | 0.052173913  | 0.872068135 | 0.937547654 |
| s__Bifidobacterium_adolescentis      | s__Anaerobutyricum_hallii         | 0.202747921  | 0.527404884 | 0.740836293 |
| s__Bifidobacterium_adolescentis      | s__Anaerostipes_caccae            | -0.275368456 | 0.386340424 | 0.706464564 |
| s__Bifidobacterium_catenuatum        | s__Anaerostipes_caccae            | -0.1023557   | 0.751594652 | 0.872601628 |
| s__Bifidobacterium_bifidum           | s__Anaerostipes_caccae            | 0.398651251  | 0.199274094 | 0.645261321 |
| s__Bifidobacterium_longum            | s__Anaerostipes_caccae            | 0.431410581  | 0.161423074 | 0.645261321 |
| s__Bifidobacterium_pseudocatenulatum | s__Anaerostipes_caccae            | 0.467187716  | 0.125685806 | 0.598714546 |
| s__Bifidobacterium_pseudocatenulatum | s__Anaerostipes_hadrus            | -0.35564338  | 0.256568192 | 0.645261321 |
| s__Bifidobacterium_catenuatum        | s__Anaerostipes_hadrus            | -0.243492377 | 0.445692547 | 0.724609819 |
| s__Bifidobacterium_bifidum           | s__Anaerostipes_hadrus            | -0.20785649  | 0.516822372 | 0.734984411 |
| s__Bifidobacterium_longum            | s__Anaerostipes_hadrus            | -0.131013944 | 0.684848714 | 0.828923516 |
| s__Bifidobacterium_adolescentis      | s__Anaerostipes_hadrus            | 0.305699203  | 0.333893136 | 0.660447962 |
| s__Bifidobacterium_catenuatum        | s__Anaerotignum_faecicola         | -0.47826087  | 0.115776907 | 0.596315484 |
| s__Bifidobacterium_adolescentis      | s__Anaerotignum_faecicola         | -0.241737906 | 0.449079894 | 0.727301627 |
| s__Bifidobacterium_bifidum           | s__Anaerotignum_faecicola         | -0.106705851 | 0.741349551 | 0.865709392 |
| s__Bifidobacterium_longum            | s__Anaerotignum_faecicola         | 0.171555933  | 0.593946326 | 0.796140819 |
| s__Bifidobacterium_pseudocatenulatum | s__Anaerotignum_faecicola         | 0.24607825   | 0.440722428 | 0.724609819 |
| s__Bifidobacterium_adolescentis      | s__Anaerotignum_lactatifermentans | -0.295656198 | 0.350811021 | 0.669943949 |
| s__Bifidobacterium_catenuatum        | s__Anaerotignum_lactatifermentans | -0.02997184  | 0.926329449 | 0.952796005 |
| s__Bifidobacterium_pseudocatenulatum | s__Anaerotignum_lactatifermentans | 0.24624379   | 0.440405169 | 0.724609819 |
| s__Bifidobacterium_longum            | s__Anaerotignum_lactatifermentans | 0.381665274  | 0.220867467 | 0.645261321 |
| s__Bifidobacterium_bifidum           | s__Anaerotignum_lactatifermentans | 0.524499988  | 0.080002751 | 0.564498291 |
| s__Bifidobacterium_longum            | s__Anaerotruncus_colihominis      | -0.393041832 | 0.206255757 | 0.645261321 |
| s__Bifidobacterium_pseudocatenulatum | s__Anaerotruncus_colihominis      | -0.35564338  | 0.256568192 | 0.645261321 |
| s__Bifidobacterium_bifidum           | s__Anaerotruncus_colihominis      | -0.20785649  | 0.516822372 | 0.734984411 |
| s__Bifidobacterium_adolescentis      | s__Anaerotruncus_colihominis      | 0.393041832  | 0.206255757 | 0.645261321 |
| s__Bifidobacterium_catenuatum        | s__Anaerotruncus_colihominis      | 0.535683229  | 0.07264704  | 0.564498291 |
| s__Bifidobacterium_catenuatum        | s__Anaerotruncus_massiliensis     | -0.391304348 | 0.208448128 | 0.645261321 |
| s__Bifidobacterium_adolescentis      | s__Anaerotruncus_massiliensis     | -0.304121881 | 0.336520417 | 0.662524571 |
| s__Bifidobacterium_bifidum           | s__Anaerotruncus_massiliensis     | 0.139181545  | 0.666176858 | 0.828923516 |
| s__Bifidobacterium_pseudocatenulatum | s__Anaerotruncus_massiliensis     | 0.218295222  | 0.495490948 | 0.734984411 |
| s__Bifidobacterium_longum            | s__Anaerotruncus_massiliensis     | 0.265131896  | 0.404939828 | 0.724609819 |
| s__Bifidobacterium_adolescentis      | s__Anaerotruncus_rubiinfantis     | -0.422231633 | 0.171528099 | 0.645261321 |
| s__Bifidobacterium_pseudocatenulatum | s__Anaerotruncus_rubiinfantis     | 0.112125052  | 0.728640611 | 0.860437835 |
| s__Bifidobacterium_catenuatum        | s__Anaerotruncus_rubiinfantis     | 0.16376912   | 0.611043329 | 0.80885691  |
| s__Bifidobacterium_longum            | s__Anaerotruncus_rubiinfantis     | 0.624168501  | 0.030059525 | 0.564498291 |
| s__Bifidobacterium_bifidum           | s__Anaerotruncus_rubiinfantis     | 0.666239077  | 0.018000568 | 0.527898179 |
| s__Bifidobacterium_longum            | s__Angelakisella_massiliensis     | -0.480384461 | 0.113937412 | 0.596315484 |
| s__Bifidobacterium_pseudocatenulatum | s__Angelakisella_massiliensis     | -0.35564338  | 0.256568192 | 0.645261321 |
| s__Bifidobacterium_bifidum           | s__Angelakisella_massiliensis     | -0.20785649  | 0.516822372 | 0.734984411 |
| s__Bifidobacterium_catenuatum        | s__Angelakisella_massiliensis     | 0.146095426  | 0.650505463 | 0.828923516 |
| s__Bifidobacterium_adolescentis      | s__Angelakisella_massiliensis     | 0.218356573  | 0.49536676  | 0.734984411 |
| s__Bifidobacterium_longum            | s__Bacteroidaceae_bacterium       | -0.381665274 | 0.220867467 | 0.645261321 |
| s__Bifidobacterium_catenuatum        | s__Bacteroidaceae_bacterium       | -0.359662076 | 0.250847879 | 0.645261321 |
| s__Bifidobacterium_bifidum           | s__Bacteroidaceae_bacterium       | -0.307024383 | 0.33169446  | 0.660447962 |
| s__Bifidobacterium_adolescentis      | s__Bacteroidaceae_bacterium       | -0.215022689 | 0.502135449 | 0.734984411 |
| s__Bifidobacterium_pseudocatenulatum | s__Bacteroidaceae_bacterium       | 0.437766738  | 0.154651873 | 0.634727557 |
| s__Bifidobacterium_pseudocatenulatum | s__Bacteroides_caccae             | -0.275362319 | 0.386351442 | 0.706464564 |
| s__Bifidobacterium_longum            | s__Bacteroides_caccae             | -0.149489859 | 0.642858284 | 0.828923516 |
| s__Bifidobacterium_adolescentis      | s__Bacteroides_caccae             | -0.117456318 | 0.716198779 | 0.852134525 |
| s__Bifidobacterium_bifidum           | s__Bacteroides_caccae             | 0.241404093  | 0.449725769 | 0.727412669 |
| s__Bifidobacterium_catenuatum        | s__Bacteroides_caccae             | 0.571536582  | 0.05221559  | 0.564498291 |
| s__Bifidobacterium_adolescentis      | s__Bacteroides_cellulosilyticus   | -0.818634943 | 0.001129847 | 0.116865569 |
| s__Bifidobacterium_catenuatum        | s__Bacteroides_cellulosilyticus   | 0.071442073  | 0.82537651  | 0.906690848 |
| s__Bifidobacterium_pseudocatenulatum | s__Bacteroides_cellulosilyticus   | 0.427536232  | 0.16564109  | 0.645261321 |
| s__Bifidobacterium_bifidum           | s__Bacteroides_cellulosilyticus   | 0.592922335  | 0.042163365 | 0.564498291 |

|                                      |                                 |              |             |             |
|--------------------------------------|---------------------------------|--------------|-------------|-------------|
| s__Bifidobacterium_longum            | s__Bacteroides_cellulosilyticus | 0.679822931  | 0.015005825 | 0.527898179 |
| s__Bifidobacterium_longum            | s__Bacteroides_clarus           | -0.532379015 | 0.074769972 | 0.564498291 |
| s__Bifidobacterium_bifidum           | s__Bacteroides_clarus           | -0.393190275 | 0.206069105 | 0.645261321 |
| s__Bifidobacterium_pseudocatenulatum | s__Bacteroides_clarus           | -0.275640752 | 0.385851757 | 0.706464564 |
| s__Bifidobacterium_catenulatum       | s__Bacteroides_clarus           | 0.317302671  | 0.314909974 | 0.660447962 |
| s__Bifidobacterium_adolescentis      | s__Bacteroides_clarus           | 0.339621096  | 0.28012265  | 0.660447962 |
| s__Bifidobacterium_bifidum           | s__Bacteroides_faecis           | -0.475247525 | 0.118420573 | 0.596315484 |
| s__Bifidobacterium_longum            | s__Bacteroides_faecis           | -0.370280895 | 0.236096162 | 0.645261321 |
| s__Bifidobacterium_adolescentis      | s__Bacteroides_faecis           | -0.07904873  | 0.807077707 | 0.900520907 |
| s__Bifidobacterium_catenulatum       | s__Bacteroides_faecis           | -0.018557539 | 0.954352019 | 0.969744794 |
| s__Bifidobacterium_pseudocatenulatum | s__Bacteroides_faecis           | 0.067762553  | 0.834257343 | 0.914027432 |
| s__Bifidobacterium_bifidum           | s__Bacteroides_finegoldii       | -0.556726179 | 0.060090882 | 0.564498291 |
| s__Bifidobacterium_catenulatum       | s__Bacteroides_finegoldii       | -0.513043478 | 0.088048359 | 0.586989062 |
| s__Bifidobacterium_adolescentis      | s__Bacteroides_finegoldii       | -0.428889832 | 0.164159595 | 0.645261321 |
| s__Bifidobacterium_longum            | s__Bacteroides_finegoldii       | -0.374303854 | 0.230645337 | 0.645261321 |
| s__Bifidobacterium_pseudocatenulatum | s__Bacteroides_finegoldii       | 0.571536582  | 0.05221559  | 0.564498291 |
| s__Bifidobacterium_longum            | s__Bacteroides_fragilis         | -0.650443636 | 0.022008557 | 0.527898179 |
| s__Bifidobacterium_pseudocatenulatum | s__Bacteroides_fragilis         | -0.525320086 | 0.079446787 | 0.564498291 |
| s__Bifidobacterium_bifidum           | s__Bacteroides_fragilis         | -0.307024383 | 0.33169446  | 0.660447962 |
| s__Bifidobacterium_adolescentis      | s__Bacteroides_fragilis         | 0.440796513  | 0.151489057 | 0.634727557 |
| s__Bifidobacterium_catenulatum       | s__Bacteroides_fragilis         | 0.479549435  | 0.114658408 | 0.596315484 |
| s__Bifidobacterium_adolescentis      | s__Bacteroides_nordii           | -0.293726353 | 0.35411323  | 0.669943949 |
| s__Bifidobacterium_catenulatum       | s__Bacteroides_nordii           | -0.03070671  | 0.924527629 | 0.952796005 |
| s__Bifidobacterium_bifidum           | s__Bacteroides_nordii           | 0.02730488   | 0.932871149 | 0.954847805 |
| s__Bifidobacterium_longum            | s__Bacteroides_nordii           | 0.045894743  | 0.887372502 | 0.941362816 |
| s__Bifidobacterium_pseudocatenulatum | s__Bacteroides_nordii           | 0.280312629  | 0.377517116 | 0.704698617 |
| s__Bifidobacterium_adolescentis      | s__Bacteroides_ovatus           | -0.272727273 | 0.391232746 | 0.708266178 |
| s__Bifidobacterium_bifidum           | s__Bacteroides_ovatus           | -0.232985732 | 0.46615919  | 0.734984411 |
| s__Bifidobacterium_longum            | s__Bacteroides_ovatus           | -0.195804196 | 0.542873521 | 0.757497936 |
| s__Bifidobacterium_pseudocatenulatum | s__Bacteroides_ovatus           | -0.142371294 | 0.658931117 | 0.828923516 |
| s__Bifidobacterium_catenulatum       | s__Bacteroides_ovatus           | -0.116969954 | 0.717331256 | 0.852351718 |
| s__Bifidobacterium_bifidum           | s__Bacteroides_salyersiae       | -0.475247525 | 0.118420573 | 0.596315484 |
| s__Bifidobacterium_longum            | s__Bacteroides_salyersiae       | -0.428527328 | 0.164555525 | 0.645261321 |
| s__Bifidobacterium_adolescentis      | s__Bacteroides_salyersiae       | -0.045765054 | 0.887688984 | 0.941362816 |
| s__Bifidobacterium_pseudocatenulatum | s__Bacteroides_salyersiae       | -0.00423516  | 0.989577786 | 0.991939547 |
| s__Bifidobacterium_catenulatum       | s__Bacteroides_salyersiae       | 0.018557539  | 0.954352019 | 0.969744794 |
| s__Bifidobacterium_catenulatum       | s__Bacteroides_stercoris        | -0.440559448 | 0.151735028 | 0.634727557 |
| s__Bifidobacterium_bifidum           | s__Bacteroides_stercoris        | -0.431986272 | 0.160802188 | 0.645261321 |
| s__Bifidobacterium_longum            | s__Bacteroides_stercoris        | -0.12101556  | 0.707927241 | 0.844685913 |
| s__Bifidobacterium_pseudocatenulatum | s__Bacteroides_stercoris        | -0.061594203 | 0.849184662 | 0.924781914 |
| s__Bifidobacterium_adolescentis      | s__Bacteroides_stercoris        | 0.13525273   | 0.675137513 | 0.828923516 |
| s__Bifidobacterium_pseudocatenulatum | s__Bacteroides_thetaiotaomicron | -0.239130435 | 0.454136695 | 0.733605431 |
| s__Bifidobacterium_catenulatum       | s__Bacteroides_thetaiotaomicron | -0.142884145 | 0.657768629 | 0.828923516 |
| s__Bifidobacterium_adolescentis      | s__Bacteroides_thetaiotaomicron | 0.039152106  | 0.903845769 | 0.949038058 |
| s__Bifidobacterium_bifidum           | s__Bacteroides_thetaiotaomicron | 0.203287658  | 0.526282439 | 0.740832571 |
| s__Bifidobacterium_longum            | s__Bacteroides_thetaiotaomicron | 0.309657565  | 0.327349027 | 0.660447962 |
| s__Bifidobacterium_adolescentis      | s__Bacteroides_uniformis        | -0.237762238 | 0.457102207 | 0.734984411 |
| s__Bifidobacterium_pseudocatenulatum | s__Bacteroides_uniformis        | 0.021355694  | 0.947476916 | 0.964314147 |
| s__Bifidobacterium_catenulatum       | s__Bacteroides_uniformis        | 0.272929893  | 0.39073083  | 0.708266178 |
| s__Bifidobacterium_bifidum           | s__Bacteroides_uniformis        | 0.399404112  | 0.198348249 | 0.645261321 |
| s__Bifidobacterium_longum            | s__Bacteroides_uniformis        | 0.517482517  | 0.088650879 | 0.5878953   |
| s__Bifidobacterium_longum            | s__Bacteroides_xylanisolvens    | -0.381665274 | 0.220867467 | 0.645261321 |
| s__Bifidobacterium_catenulatum       | s__Bacteroides_xylanisolvens    | -0.359662076 | 0.250847879 | 0.645261321 |
| s__Bifidobacterium_bifidum           | s__Bacteroides_xylanisolvens    | -0.307024383 | 0.33169446  | 0.660447962 |
| s__Bifidobacterium_adolescentis      | s__Bacteroides_xylanisolvens    | -0.215022689 | 0.502135449 | 0.734984411 |
| s__Bifidobacterium_pseudocatenulatum | s__Bacteroides_xylanisolvens    | 0.437766738  | 0.154651873 | 0.634727557 |
| s__Bifidobacterium_pseudocatenulatum | s__Barnesiella_intestinihominis | -0.246957349 | 0.439038886 | 0.724609819 |
| s__Bifidobacterium_adolescentis      | s__Barnesiella_intestinihominis | -0.179151876 | 0.577448742 | 0.789138193 |
| s__Bifidobacterium_catenulatum       | s__Barnesiella_intestinihominis | 0.474464881  | 0.119113642 | 0.596315484 |
| s__Bifidobacterium_longum            | s__Barnesiella_intestinihominis | 0.645693219  | 0.023331633 | 0.527898179 |
| s__Bifidobacterium_bifidum           | s__Barnesiella_intestinihominis | 0.76830482   | 0.003510213 | 0.223758646 |
| s__Bifidobacterium_longum            | s__Bilophila_wadsworthia        | -0.359163836 | 0.25155299  | 0.645261321 |
| s__Bifidobacterium_bifidum           | s__Bilophila_wadsworthia        | -0.192733671 | 0.548414485 | 0.762695642 |
| s__Bifidobacterium_adolescentis      | s__Bilophila_wadsworthia        | -0.049296997 | 0.87907541  | 0.941362816 |
| s__Bifidobacterium_pseudocatenulatum | s__Bilophila_wadsworthia        | 0.01075331   | 0.973540856 | 0.980731707 |
| s__Bifidobacterium_catenulatum       | s__Bilophila_wadsworthia        | 0.157062143  | 0.625914099 | 0.822712109 |
| s__Bifidobacterium_catenulatum       | s__Bittarella_massiliensis      | -0.606438162 | 0.036568342 | 0.564498291 |
| s__Bifidobacterium_bifidum           | s__Bittarella_massiliensis      | -0.487485767 | 0.107926732 | 0.596315484 |
| s__Bifidobacterium_adolescentis      | s__Bittarella_massiliensis      | -0.10151593  | 0.753576707 | 0.872601628 |
| s__Bifidobacterium_longum            | s__Bittarella_massiliensis      | -0.072511378 | 0.822799126 | 0.904648254 |

|                                      |                                           |              |             |             |
|--------------------------------------|-------------------------------------------|--------------|-------------|-------------|
| s__Bifidobacterium_pseudocatenulatum | s__Bittarella_massiliensis                | 0.29525321   | 0.351499226 | 0.669943949 |
| s__Bifidobacterium_longum            | s__Blautia_faecis                         | -0.650443636 | 0.022008557 | 0.527898179 |
| s__Bifidobacterium_pseudocatenulatum | s__Blautia_faecis                         | -0.525320086 | 0.079446787 | 0.564498291 |
| s__Bifidobacterium_bifidum           | s__Blautia_faecis                         | -0.307024383 | 0.33169446  | 0.660447962 |
| s__Bifidobacterium_adolescentis      | s__Blautia_faecis                         | 0.440796513  | 0.151489057 | 0.634727557 |
| s__Bifidobacterium_catenulatum       | s__Blautia_faecis                         | 0.479549435  | 0.114658408 | 0.596315484 |
| s__Bifidobacterium_catenulatum       | s__Blautia_glucerasea                     | -0.15353355  | 0.633789829 | 0.825827492 |
| s__Bifidobacterium_bifidum           | s__Blautia_glucerasea                     | 0.032765856  | 0.91948059  | 0.952796005 |
| s__Bifidobacterium_pseudocatenulatum | s__Blautia_glucerasea                     | 0.144828192  | 0.653368359 | 0.828923516 |
| s__Bifidobacterium_longum            | s__Blautia_glucerasea                     | 0.293726353  | 0.35411323  | 0.669943949 |
| s__Bifidobacterium_adolescentis      | s__Blautia_glucerasea                     | 0.367157942  | 0.240379807 | 0.645261321 |
| s__Bifidobacterium_adolescentis      | s__Blautia_hominis                        | -0.370914139 | 0.235233133 | 0.645261321 |
| s__Bifidobacterium_catenulatum       | s__Blautia_hominis                        | -0.359662076 | 0.250847879 | 0.645261321 |
| s__Bifidobacterium_bifidum           | s__Blautia_hominis                        | -0.307024383 | 0.33169446  | 0.660447962 |
| s__Bifidobacterium_longum            | s__Blautia_hominis                        | 0.075257941  | 0.816186409 | 0.900520907 |
| s__Bifidobacterium_pseudocatenulatum | s__Blautia_hominis                        | 0.470599244  | 0.122575961 | 0.596315484 |
| s__Bifidobacterium_catenulatum       | s__Blautia_massiliensis                   | -0.2047114   | 0.523326534 | 0.740057032 |
| s__Bifidobacterium_adolescentis      | s__Blautia_massiliensis                   | -0.091789485 | 0.776630219 | 0.882375181 |
| s__Bifidobacterium_pseudocatenulatum | s__Blautia_massiliensis                   | -0.028031263 | 0.931089034 | 0.954847805 |
| s__Bifidobacterium_longum            | s__Blautia_massiliensis                   | 0.238652662  | 0.455066178 | 0.734165665 |
| s__Bifidobacterium_bifidum           | s__Blautia_massiliensis                   | 0.305814658  | 0.333701265 | 0.660447962 |
| s__Bifidobacterium_pseudocatenulatum | s__Blautia_obeum                          | -0.525320086 | 0.079446787 | 0.564498291 |
| s__Bifidobacterium_longum            | s__Blautia_obeum                          | -0.430045379 | 0.16290152  | 0.645261321 |
| s__Bifidobacterium_bifidum           | s__Blautia_obeum                          | -0.307024383 | 0.33169446  | 0.660447962 |
| s__Bifidobacterium_catenulatum       | s__Blautia_obeum                          | -0.095909887 | 0.766842774 | 0.87977919  |
| s__Bifidobacterium_adolescentis      | s__Blautia_obeum                          | 0.392416408  | 0.207043295 | 0.645261321 |
| s__Bifidobacterium_pseudocatenulatum | s__Blautia_SGB4815                        | -0.696683743 | 0.011819569 | 0.527898179 |
| s__Bifidobacterium_longum            | s__Blautia_SGB4815                        | -0.307874003 | 0.330288959 | 0.660447962 |
| s__Bifidobacterium_bifidum           | s__Blautia_SGB4815                        | -0.175742574 | 0.584830936 | 0.794059246 |
| s__Bifidobacterium_catenulatum       | s__Blautia_SGB4815                        | 0.324756937  | 0.303037095 | 0.660447962 |
| s__Bifidobacterium_adolescentis      | s__Blautia_SGB4815                        | 0.407725031  | 0.188291509 | 0.645261321 |
| s__Bifidobacterium_longum            | s__Blautia_SGB4831                        | -0.480384461 | 0.113937412 | 0.596315484 |
| s__Bifidobacterium_pseudocatenulatum | s__Blautia_SGB4831                        | -0.35564338  | 0.256568192 | 0.645261321 |
| s__Bifidobacterium_bifidum           | s__Blautia_SGB4831                        | -0.20785649  | 0.516822372 | 0.734984411 |
| s__Bifidobacterium_catenulatum       | s__Blautia_SGB4831                        | 0.146095426  | 0.650505463 | 0.828923516 |
| s__Bifidobacterium_adolescentis      | s__Blautia_SGB4831                        | 0.218356573  | 0.49536676  | 0.734984411 |
| s__Bifidobacterium_catenulatum       | s__Blautia_sp_AF19_10LB                   | -0.243492377 | 0.445692547 | 0.724609819 |
| s__Bifidobacterium_bifidum           | s__Blautia_sp_AF19_10LB                   | -0.20785649  | 0.516822372 | 0.734984411 |
| s__Bifidobacterium_adolescentis      | s__Blautia_sp_AF19_10LB                   | -0.131013944 | 0.684848714 | 0.828923516 |
| s__Bifidobacterium_longum            | s__Blautia_sp_AF19_10LB                   | 0.131013944  | 0.684848714 | 0.828923516 |
| s__Bifidobacterium_pseudocatenulatum | s__Blautia_sp_AF19_10LB                   | 0.400098802  | 0.197496288 | 0.645261321 |
| s__Bifidobacterium_longum            | s__Blautia_sp_MSK_20_85                   | -0.660884295 | 0.019293714 | 0.527898179 |
| s__Bifidobacterium_bifidum           | s__Blautia_sp_MSK_20_85                   | -0.393190275 | 0.206069105 | 0.645261321 |
| s__Bifidobacterium_catenulatum       | s__Blautia_sp_MSK_20_85                   | -0.17400469  | 0.588608115 | 0.795634689 |
| s__Bifidobacterium_adolescentis      | s__Blautia_sp_MSK_20_85                   | 0.027536846  | 0.932302012 | 0.954847805 |
| s__Bifidobacterium_pseudocatenulatum | s__Blautia_sp_MSK_20_85                   | 0.116796929  | 0.717734264 | 0.852351718 |
| s__Bifidobacterium_longum            | s__Blautia_wexlerae                       | -0.521139683 | 0.082308466 | 0.564812347 |
| s__Bifidobacterium_bifidum           | s__Blautia_wexlerae                       | -0.310049818 | 0.326704379 | 0.660447962 |
| s__Bifidobacterium_pseudocatenulatum | s__Blautia_wexlerae                       | -0.207897324 | 0.516738159 | 0.734984411 |
| s__Bifidobacterium_catenulatum       | s__Blautia_wexlerae                       | -0.157062143 | 0.625914099 | 0.822712109 |
| s__Bifidobacterium_adolescentis      | s__Blautia_wexlerae                       | 0            | 1           | 1           |
| s__Bifidobacterium_adolescentis      | s__Butyricoccus_sp_AM29_23AC              | -0.458947427 | 0.133408824 | 0.602491464 |
| s__Bifidobacterium_catenulatum       | s__Butyricoccus_sp_AM29_23AC              | -0.15353355  | 0.633789829 | 0.825827492 |
| s__Bifidobacterium_bifidum           | s__Butyricoccus_sp_AM29_23AC              | -0.092836593 | 0.774140075 | 0.882375181 |
| s__Bifidobacterium_longum            | s__Butyricoccus_sp_AM29_23AC              | 0.321263199  | 0.308570238 | 0.660447962 |
| s__Bifidobacterium_pseudocatenulatum | s__Butyricoccus_sp_AM29_23AC              | 0.364406418  | 0.24419181  | 0.645261321 |
| s__Bifidobacterium_catenulatum       | s__Butyricomonas_paravirosa               | -0.359662076 | 0.250847879 | 0.645261321 |
| s__Bifidobacterium_bifidum           | s__Butyricomonas_paravirosa               | -0.307024383 | 0.33169446  | 0.660447962 |
| s__Bifidobacterium_longum            | s__Butyricomonas_paravirosa               | -0.102135777 | 0.752113588 | 0.872601628 |
| s__Bifidobacterium_adolescentis      | s__Butyricomonas_paravirosa               | -0.075257941 | 0.816186409 | 0.900520907 |
| s__Bifidobacterium_pseudocatenulatum | s__Butyricomonas_paravirosa               | 0.651178024  | 0.021809004 | 0.527898179 |
| s__Bifidobacterium_adolescentis      | s__Butyricomonas_virosa                   | -0.12850528  | 0.690616956 | 0.832705612 |
| s__Bifidobacterium_catenulatum       | s__Butyricomonas_virosa                   | -0.1023557   | 0.751594652 | 0.872601628 |
| s__Bifidobacterium_longum            | s__Butyricomonas_virosa                   | 0.146863177  | 0.648773089 | 0.828923516 |
| s__Bifidobacterium_bifidum           | s__Butyricomonas_virosa                   | 0.349502467  | 0.265454857 | 0.660447962 |
| s__Bifidobacterium_pseudocatenulatum | s__Butyricomonas_virosa                   | 0.560625259  | 0.057942444 | 0.564498291 |
| s__Bifidobacterium_adolescentis      | s__Candidatus_Alloruminococcus_vanvlietii | -0.480384461 | 0.113937412 | 0.596315484 |
| s__Bifidobacterium_catenulatum       | s__Candidatus_Alloruminococcus_vanvlietii | -0.243492377 | 0.445692547 | 0.724609819 |
| s__Bifidobacterium_pseudocatenulatum | s__Candidatus_Alloruminococcus_vanvlietii | 0.044455422  | 0.890885751 | 0.941362816 |
| s__Bifidobacterium_longum            | s__Candidatus_Alloruminococcus_vanvlietii | 0.218356573  | 0.49536676  | 0.734984411 |

|                                      |                                           |              |             |             |
|--------------------------------------|-------------------------------------------|--------------|-------------|-------------|
| s__Bifidobacterium_bifidum           | s__Candidatus_Alloruminococcus_vanvlietii | 0.259820612  | 0.414763969 | 0.724609819 |
| s__Bifidobacterium_pseudocatenulatum | s__Candidatus_Cibiobacter_qucibialis      | -0.384402495 | 0.21729649  | 0.645261321 |
| s__Bifidobacterium_catenulatum       | s__Candidatus_Cibiobacter_qucibialis      | -0.382101851 | 0.220295557 | 0.645261321 |
| s__Bifidobacterium_bifidum           | s__Candidatus_Cibiobacter_qucibialis      | -0.262108948 | 0.410516871 | 0.724609819 |
| s__Bifidobacterium_longum            | s__Candidatus_Cibiobacter_qucibialis      | -0.125874126 | 0.699712221 | 0.838058363 |
| s__Bifidobacterium_adolescentis      | s__Candidatus_Cibiobacter_qucibialis      | 0.20979021   | 0.513512513 | 0.734984411 |
| s__Bifidobacterium_pseudocatenulatum | s__Citrobacter_freundii                   | -0.672750311 | 0.016515109 | 0.527898179 |
| s__Bifidobacterium_longum            | s__Citrobacter_freundii                   | -0.578273758 | 0.048884712 | 0.564498291 |
| s__Bifidobacterium_bifidum           | s__Citrobacter_freundii                   | -0.393190275 | 0.206069105 | 0.645261321 |
| s__Bifidobacterium_catenulatum       | s__Citrobacter_freundii                   | 0.317302671  | 0.314909974 | 0.660447962 |
| s__Bifidobacterium_adolescentis      | s__Citrobacter_freundii                   | 0.660884295  | 0.019293714 | 0.527898179 |
| s__Bifidobacterium_adolescentis      | s__Citrobacter_murliniae                  | -0.182769286 | 0.569656586 | 0.782734241 |
| s__Bifidobacterium_pseudocatenulatum | s__Citrobacter_murliniae                  | -0.125857937 | 0.696720483 | 0.837439065 |
| s__Bifidobacterium_catenulatum       | s__Citrobacter_murliniae                  | 0.58145369   | 0.047365697 | 0.564498291 |
| s__Bifidobacterium_longum            | s__Citrobacter_murliniae                  | 0.639692501  | 0.025084403 | 0.527898179 |
| s__Bifidobacterium_bifidum           | s__Citrobacter_murliniae                  | 0.703597545  | 0.010670114 | 0.527898179 |
| s__Bifidobacterium_adolescentis      | s__Clostridia_bacterium                   | -0.739616059 | 0.005969519 | 0.341890648 |
| s__Bifidobacterium_catenulatum       | s__Clostridia_bacterium                   | -0.323433686 | 0.305126207 | 0.660447962 |
| s__Bifidobacterium_bifidum           | s__Clostridia_bacterium                   | 0.254527967  | 0.42467002  | 0.724609819 |
| s__Bifidobacterium_longum            | s__Clostridia_bacterium                   | 0.384310305  | 0.21741619  | 0.645261321 |
| s__Bifidobacterium_pseudocatenulatum | s__Clostridia_bacterium                   | 0.402282498  | 0.194832889 | 0.645261321 |
| s__Bifidobacterium_catenulatum       | s__Clostridia_bacterium_UC5_1_1D1         | -0.243492377 | 0.445692547 | 0.724609819 |
| s__Bifidobacterium_bifidum           | s__Clostridia_bacterium_UC5_1_1D1         | -0.20785649  | 0.516822372 | 0.734984411 |
| s__Bifidobacterium_adolescentis      | s__Clostridia_bacterium_UC5_1_1D1         | -0.131013944 | 0.684848714 | 0.828923516 |
| s__Bifidobacterium_longum            | s__Clostridia_bacterium_UC5_1_1D1         | 0.131013944  | 0.684848714 | 0.828923516 |
| s__Bifidobacterium_pseudocatenulatum | s__Clostridia_bacterium_UC5_1_1D1         | 0.400098802  | 0.197496288 | 0.645261321 |
| s__Bifidobacterium_adolescentis      | s__Clostridia_unclassified_SGB4367        | 0.131013944  | 0.684848714 | 0.828923516 |
| s__Bifidobacterium_catenulatum       | s__Clostridia_unclassified_SGB4367        | 0.243492377  | 0.445692547 | 0.724609819 |
| s__Bifidobacterium_longum            | s__Clostridia_unclassified_SGB4367        | 0.305699203  | 0.333893136 | 0.660447962 |
| s__Bifidobacterium_pseudocatenulatum | s__Clostridia_unclassified_SGB4367        | 0.311187957  | 0.324837832 | 0.660447962 |
| s__Bifidobacterium_bifidum           | s__Clostridia_unclassified_SGB4367        | 0.467677102  | 0.12523656  | 0.598714546 |
| s__Bifidobacterium_adolescentis      | s__Clostridia_unclassified_SGB4447        | -0.403167543 | 0.193759757 | 0.645261321 |
| s__Bifidobacterium_catenulatum       | s__Clostridia_unclassified_SGB4447        | -0.359662076 | 0.250847879 | 0.645261321 |
| s__Bifidobacterium_bifidum           | s__Clostridia_unclassified_SGB4447        | -0.307024383 | 0.33169446  | 0.660447962 |
| s__Bifidobacterium_longum            | s__Clostridia_unclassified_SGB4447        | 0.053755672  | 0.868219023 | 0.935005102 |
| s__Bifidobacterium_pseudocatenulatum | s__Clostridia_unclassified_SGB4447        | 0.448710907  | 0.143423366 | 0.634082249 |
| s__Bifidobacterium_adolescentis      | s__Clostridiaceae_bacterium               | -0.203031859 | 0.526814273 | 0.740832571 |
| s__Bifidobacterium_catenulatum       | s__Clostridiaceae_bacterium               | -0.169802685 | 0.597779735 | 0.79832559  |
| s__Bifidobacterium_pseudocatenulatum | s__Clostridiaceae_bacterium               | -0.169770596 | 0.597849986 | 0.79832559  |
| s__Bifidobacterium_bifidum           | s__Clostridiaceae_bacterium               | -0.021570167 | 0.946950085 | 0.964314147 |
| s__Bifidobacterium_longum            | s__Clostridiaceae_bacterium               | 0.058009103  | 0.8578818   | 0.92943342  |
| s__Bifidobacterium_longum            | s__Clostridiaceae_bacterium_OM08_6BH      | -0.381665274 | 0.220867467 | 0.645261321 |
| s__Bifidobacterium_catenulatum       | s__Clostridiaceae_bacterium_OM08_6BH      | -0.359662076 | 0.250847879 | 0.645261321 |
| s__Bifidobacterium_bifidum           | s__Clostridiaceae_bacterium_OM08_6BH      | -0.307024383 | 0.33169446  | 0.660447962 |
| s__Bifidobacterium_adolescentis      | s__Clostridiaceae_bacterium_OM08_6BH      | -0.215022689 | 0.502135449 | 0.734984411 |
| s__Bifidobacterium_pseudocatenulatum | s__Clostridiaceae_bacterium_OM08_6BH      | 0.437766738  | 0.154651873 | 0.634727557 |
| s__Bifidobacterium_adolescentis      | s__Clostridiaceae_unclassified_SGB4769    | -0.305699203 | 0.333893136 | 0.660447962 |
| s__Bifidobacterium_catenulatum       | s__Clostridiaceae_unclassified_SGB4769    | -0.243492377 | 0.445692547 | 0.724609819 |
| s__Bifidobacterium_longum            | s__Clostridiaceae_unclassified_SGB4769    | -0.218356573 | 0.495366676 | 0.734984411 |
| s__Bifidobacterium_bifidum           | s__Clostridiaceae_unclassified_SGB4769    | -0.20785649  | 0.516822372 | 0.734984411 |
| s__Bifidobacterium_pseudocatenulatum | s__Clostridiaceae_unclassified_SGB4769    | 0.133366267  | 0.679453948 | 0.828923516 |
| s__Bifidobacterium_adolescentis      | s__Clostridiales_bacterium                | -0.640670825 | 0.024792334 | 0.527898179 |
| s__Bifidobacterium_catenulatum       | s__Clostridiales_bacterium                | -0.22623323  | 0.479539716 | 0.734984411 |
| s__Bifidobacterium_bifidum           | s__Clostridiales_bacterium                | 0.103761409  | 0.748279937 | 0.870574996 |
| s__Bifidobacterium_longum            | s__Clostridiales_bacterium                | 0.380843213  | 0.221946782 | 0.645261321 |
| s__Bifidobacterium_pseudocatenulatum | s__Clostridiales_bacterium                | 0.442028986  | 0.150214394 | 0.634727557 |
| s__Bifidobacterium_adolescentis      | s__Clostridiales_bacterium_1_7_47FAA      | -0.204271555 | 0.524238954 | 0.740057032 |
| s__Bifidobacterium_pseudocatenulatum | s__Clostridiales_bacterium_1_7_47FAA      | -0.136802106 | 0.67159907  | 0.828923516 |
| s__Bifidobacterium_catenulatum       | s__Clostridiales_bacterium_1_7_47FAA      | 0.569464954  | 0.053270987 | 0.564498291 |
| s__Bifidobacterium_longum            | s__Clostridiales_bacterium_1_7_47FAA      | 0.650443636  | 0.022008557 | 0.527898179 |
| s__Bifidobacterium_bifidum           | s__Clostridiales_bacterium_1_7_47FAA      | 0.678012179  | 0.015382136 | 0.527898179 |
| s__Bifidobacterium_pseudocatenulatum | s__Clostridiales_bacterium_Choco116       | -0.525320086 | 0.079446787 | 0.564498291 |
| s__Bifidobacterium_catenulatum       | s__Clostridiales_bacterium_Choco116       | -0.359662076 | 0.250847879 | 0.645261321 |
| s__Bifidobacterium_bifidum           | s__Clostridiales_bacterium_Choco116       | -0.307024383 | 0.33169446  | 0.660447962 |
| s__Bifidobacterium_longum            | s__Clostridiales_bacterium_Choco116       | -0.075257941 | 0.816186409 | 0.900520907 |
| s__Bifidobacterium_adolescentis      | s__Clostridiales_bacterium_Choco116       | 0.569810127  | 0.05309411  | 0.564498291 |
| s__Bifidobacterium_adolescentis      | s__Clostridiales_bacterium_KLE1615        | -0.263402795 | 0.408125175 | 0.724609819 |
| s__Bifidobacterium_catenulatum       | s__Clostridiales_bacterium_KLE1615        | 0.107898623  | 0.738547085 | 0.864841382 |
| s__Bifidobacterium_bifidum           | s__Clostridiales_bacterium_KLE1615        | 0.150314021  | 0.641006322 | 0.828923516 |
| s__Bifidobacterium_pseudocatenulatum | s__Clostridiales_bacterium_KLE1615        | 0.164162527  | 0.61017517  | 0.80885691  |

|                                      |                                        |              |             |             |
|--------------------------------------|----------------------------------------|--------------|-------------|-------------|
| s__Bifidobacterium_longum            | s__Clostridiales_bacterium_KLE1615     | 0.473049917  | 0.120373421 | 0.596315484 |
| s__Bifidobacterium_adolescentis      | s__Clostridiales_unclassified_SGB15145 | -0.100968434 | 0.754869662 | 0.872601628 |
| s__Bifidobacterium_catenuatum        | s__Clostridiales_unclassified_SGB15145 | -0.03070671  | 0.924527629 | 0.952796005 |
| s__Bifidobacterium_bifidum           | s__Clostridiales_unclassified_SGB15145 | 0.098297569  | 0.761185353 | 0.877487233 |
| s__Bifidobacterium_longum            | s__Clostridiales_unclassified_SGB15145 | 0.183578971  | 0.567918269 | 0.781197619 |
| s__Bifidobacterium_pseudocatenulatum | s__Clostridiales_unclassified_SGB15145 | 0.523250242  | 0.080855073 | 0.564812347 |
| s__Bifidobacterium_adolescentis      | s__Clostridiales_unclassified_SGB15150 | -0.305699203 | 0.333893136 | 0.660447962 |
| s__Bifidobacterium_catenuatum        | s__Clostridiales_unclassified_SGB15150 | -0.243492377 | 0.445692547 | 0.724609819 |
| s__Bifidobacterium_longum            | s__Clostridiales_unclassified_SGB15150 | -0.218356573 | 0.49536676  | 0.734984411 |
| s__Bifidobacterium_bifidum           | s__Clostridiales_unclassified_SGB15150 | -0.20785649  | 0.516822372 | 0.734984411 |
| s__Bifidobacterium_pseudocatenulatum | s__Clostridiales_unclassified_SGB15150 | 0.133366267  | 0.679453948 | 0.828923516 |
| s__Bifidobacterium_pseudocatenulatum | s__Clostridium_fessum                  | -0.641614154 | 0.024513055 | 0.527898179 |
| s__Bifidobacterium_longum            | s__Clostridium_fessum                  | -0.542266968 | 0.068541125 | 0.564498291 |
| s__Bifidobacterium_bifidum           | s__Clostridium_fessum                  | -0.24301202  | 0.446618751 | 0.725179931 |
| s__Bifidobacterium_catenuatum        | s__Clostridium_fessum                  | 0.125649715  | 0.697201253 | 0.837439065 |
| s__Bifidobacterium_adolescentis      | s__Clostridium_fessum                  | 0.605648821  | 0.036879648 | 0.564498291 |
| s__Bifidobacterium_catenuatum        | s__Clostridium_innocuum                | -0.243492377 | 0.445692547 | 0.724609819 |
| s__Bifidobacterium_bifidum           | s__Clostridium_innocuum                | -0.20785649  | 0.516822372 | 0.734984411 |
| s__Bifidobacterium_adolescentis      | s__Clostridium_innocuum                | -0.131013944 | 0.684848714 | 0.828923516 |
| s__Bifidobacterium_longum            | s__Clostridium_innocuum                | 0.131013944  | 0.684848714 | 0.828923516 |
| s__Bifidobacterium_pseudocatenulatum | s__Clostridium_innocuum                | 0.400098802  | 0.197496288 | 0.645261321 |
| s__Bifidobacterium_catenuatum        | s__Clostridium_methylpentosum          | -0.359662076 | 0.250847879 | 0.645261321 |
| s__Bifidobacterium_pseudocatenulatum | s__Clostridium_methylpentosum          | -0.254451917 | 0.4248132   | 0.724609819 |
| s__Bifidobacterium_adolescentis      | s__Clostridium_methylpentosum          | -0.080633509 | 0.803276168 | 0.900520907 |
| s__Bifidobacterium_bifidum           | s__Clostridium_methylpentosum          | 0.009594512  | 0.976391404 | 0.982630326 |
| s__Bifidobacterium_longum            | s__Clostridium_methylpentosum          | 0.043004538  | 0.894429051 | 0.941504264 |
| s__Bifidobacterium_pseudocatenulatum | s__Clostridium_phoceensis              | -0.155773097 | 0.628787112 | 0.822712109 |
| s__Bifidobacterium_catenuatum        | s__Clostridium_phoceensis              | -0.070753535 | 0.827036957 | 0.907723489 |
| s__Bifidobacterium_adolescentis      | s__Clostridium_phoceensis              | -0.033590977 | 0.917458947 | 0.952796005 |
| s__Bifidobacterium_longum            | s__Clostridium_phoceensis              | 0.212742853  | 0.506787667 | 0.734984411 |
| s__Bifidobacterium_bifidum           | s__Clostridium_phoceensis              | 0.255361429  | 0.423102408 | 0.724609819 |
| s__Bifidobacterium_adolescentis      | s__Clostridium_scindens                | 0.131013944  | 0.684848714 | 0.828923516 |
| s__Bifidobacterium_catenuatum        | s__Clostridium_scindens                | 0.243492377  | 0.445692547 | 0.724609819 |
| s__Bifidobacterium_longum            | s__Clostridium_scindens                | 0.305699203  | 0.333893136 | 0.660447962 |
| s__Bifidobacterium_pseudocatenulatum | s__Clostridium_scindens                | 0.311187957  | 0.324837832 | 0.660447962 |
| s__Bifidobacterium_bifidum           | s__Clostridium_scindens                | 0.467677102  | 0.12523656  | 0.598714546 |
| s__Bifidobacterium_pseudocatenulatum | s__Clostridium_sp_AF15_49              | -0.525320086 | 0.079446787 | 0.564498291 |
| s__Bifidobacterium_catenuatum        | s__Clostridium_sp_AF15_49              | -0.359662076 | 0.250847879 | 0.645261321 |
| s__Bifidobacterium_bifidum           | s__Clostridium_sp_AF15_49              | -0.307024383 | 0.33169446  | 0.660447962 |
| s__Bifidobacterium_longum            | s__Clostridium_sp_AF15_49              | -0.075257941 | 0.816186409 | 0.900520907 |
| s__Bifidobacterium_adolescentis      | s__Clostridium_sp_AF15_49              | 0.569810127  | 0.05309411  | 0.564498291 |
| s__Bifidobacterium_pseudocatenulatum | s__Clostridium_sp_AF20_17LB            | -0.208963911 | 0.514540604 | 0.734984411 |
| s__Bifidobacterium_catenuatum        | s__Clostridium_sp_AF20_17LB            | 0.258042304  | 0.418079471 | 0.724609819 |
| s__Bifidobacterium_adolescentis      | s__Clostridium_sp_AF20_17LB            | 0.264995483  | 0.405190673 | 0.724609819 |
| s__Bifidobacterium_bifidum           | s__Clostridium_sp_AF20_17LB            | 0.477414845  | 0.116515173 | 0.596315484 |
| s__Bifidobacterium_longum            | s__Clostridium_sp_AF20_17LB            | 0.522526305  | 0.081351613 | 0.564812347 |
| s__Bifidobacterium_catenuatum        | s__Clostridium_sp_AM22_11AC            | -0.556726179 | 0.060090882 | 0.564498291 |
| s__Bifidobacterium_bifidum           | s__Clostridium_sp_AM22_11AC            | -0.475247525 | 0.118420573 | 0.596315484 |
| s__Bifidobacterium_adolescentis      | s__Clostridium_sp_AM22_11AC            | -0.33283676  | 0.290455091 | 0.660447962 |
| s__Bifidobacterium_longum            | s__Clostridium_sp_AM22_11AC            | -0.112332406 | 0.728155551 | 0.860437835 |
| s__Bifidobacterium_pseudocatenulatum | s__Clostridium_sp_AM22_11AC            | 0.277402949  | 0.382696974 | 0.706464564 |
| s__Bifidobacterium_longum            | s__Clostridium_sp_AM33_3               | -0.381665274 | 0.220867467 | 0.645261321 |
| s__Bifidobacterium_catenuatum        | s__Clostridium_sp_AM33_3               | -0.359662076 | 0.250847879 | 0.645261321 |
| s__Bifidobacterium_bifidum           | s__Clostridium_sp_AM33_3               | -0.307024383 | 0.33169446  | 0.660447962 |
| s__Bifidobacterium_adolescentis      | s__Clostridium_sp_AM33_3               | -0.215022689 | 0.502135449 | 0.734984411 |
| s__Bifidobacterium_pseudocatenulatum | s__Clostridium_sp_AM33_3               | 0.437766738  | 0.154651873 | 0.634727557 |
| s__Bifidobacterium_adolescentis      | s__Clostridium_sp_SN20                 | -0.474292383 | 0.119266756 | 0.596315484 |
| s__Bifidobacterium_catenuatum        | s__Clostridium_sp_SN20                 | -0.301560013 | 0.340811332 | 0.66474037  |
| s__Bifidobacterium_bifidum           | s__Clostridium_sp_SN20                 | 0.079207921  | 0.806695669 | 0.900520907 |
| s__Bifidobacterium_longum            | s__Clostridium_sp_SN20                 | 0.320355381  | 0.310017097 | 0.660447962 |
| s__Bifidobacterium_pseudocatenulatum | s__Clostridium_sp_SN20                 | 0.605627813  | 0.036887959 | 0.564498291 |
| s__Bifidobacterium_catenuatum        | s__Clostridium_symbiosum               | -0.52024658  | 0.082928797 | 0.564812347 |
| s__Bifidobacterium_pseudocatenulatum | s__Clostridium_symbiosum               | -0.094983596 | 0.769040379 | 0.880100706 |
| s__Bifidobacterium_bifidum           | s__Clostridium_symbiosum               | -0.062174957 | 0.847777232 | 0.924047848 |
| s__Bifidobacterium_adolescentis      | s__Clostridium_symbiosum               | 0.156757891  | 0.626591784 | 0.822712109 |
| s__Bifidobacterium_longum            | s__Clostridium_symbiosum               | 0.235136837  | 0.461933626 | 0.734984411 |
| s__Bifidobacterium_pseudocatenulatum | s__Collinsella_aerofaciens             | -0.932531979 | 9.82355E-06 | 0.002062945 |
| s__Bifidobacterium_longum            | s__Collinsella_aerofaciens             | -0.223776224 | 0.48491114  | 0.734984411 |
| s__Bifidobacterium_bifidum           | s__Collinsella_aerofaciens             | -0.054085973 | 0.867415585 | 0.935005102 |
| s__Bifidobacterium_catenuatum        | s__Collinsella_aerofaciens             | 0.327515872  | 0.29870715  | 0.660447962 |

|                                      |                                         |              |             |             |
|--------------------------------------|-----------------------------------------|--------------|-------------|-------------|
| s__Bifidobacterium_adolescentis      | s__Collinsella_aerofaciens              | 0.643356643  | 0.027954553 | 0.564498291 |
| s__Bifidobacterium_longum            | s__Collinsella_massiliensis             | -0.305699203 | 0.333893136 | 0.660447962 |
| s__Bifidobacterium_catenuatum        | s__Collinsella_massiliensis             | -0.243492377 | 0.445692547 | 0.724609819 |
| s__Bifidobacterium_bifidum           | s__Collinsella_massiliensis             | -0.20785649  | 0.516822372 | 0.734984411 |
| s__Bifidobacterium_adolescentis      | s__Collinsella_massiliensis             | 0.043671315  | 0.892800448 | 0.941362816 |
| s__Bifidobacterium_pseudocatenulatum | s__Collinsella_massiliensis             | 0.489009647  | 0.106664928 | 0.596315484 |
| s__Bifidobacterium_adolescentis      | s__Collinsella_SGB14754                 | -0.295656198 | 0.350811021 | 0.669943949 |
| s__Bifidobacterium_catenuatum        | s__Collinsella_SGB14754                 | -0.02997184  | 0.926329449 | 0.952796005 |
| s__Bifidobacterium_pseudocatenulatum | s__Collinsella_SGB14754                 | 0.24624379   | 0.440405169 | 0.724609819 |
| s__Bifidobacterium_longum            | s__Collinsella_SGB14754                 | 0.381665274  | 0.220867467 | 0.645261321 |
| s__Bifidobacterium_bifidum           | s__Collinsella_SGB14754                 | 0.524499988  | 0.080002751 | 0.564498291 |
| s__Bifidobacterium_longum            | s__Coproccoccus_catus                   | -0.381665274 | 0.220867467 | 0.645261321 |
| s__Bifidobacterium_catenuatum        | s__Coproccoccus_catus                   | -0.359662076 | 0.250847879 | 0.645261321 |
| s__Bifidobacterium_bifidum           | s__Coproccoccus_catus                   | -0.307024383 | 0.33169446  | 0.660447962 |
| s__Bifidobacterium_adolescentis      | s__Coproccoccus_catus                   | -0.215022689 | 0.502135449 | 0.734984411 |
| s__Bifidobacterium_pseudocatenulatum | s__Coproccoccus_catus                   | 0.437766738  | 0.154651873 | 0.634727557 |
| s__Bifidobacterium_adolescentis      | s__Coproccoccus_comes                   | -0.480384461 | 0.113937412 | 0.596315484 |
| s__Bifidobacterium_catenuatum        | s__Coproccoccus_comes                   | -0.243492377 | 0.445692547 | 0.724609819 |
| s__Bifidobacterium_pseudocatenulatum | s__Coproccoccus_comes                   | 0.044455422  | 0.890885751 | 0.941362816 |
| s__Bifidobacterium_longum            | s__Coproccoccus_comes                   | 0.218356573  | 0.49536676  | 0.734984411 |
| s__Bifidobacterium_bifidum           | s__Coproccoccus_comes                   | 0.259820612  | 0.414763969 | 0.724609819 |
| s__Bifidobacterium_adolescentis      | s__Coproccoccus_eutactus                | -0.295656198 | 0.350811021 | 0.669943949 |
| s__Bifidobacterium_catenuatum        | s__Coproccoccus_eutactus                | -0.02997184  | 0.926329449 | 0.952796005 |
| s__Bifidobacterium_pseudocatenulatum | s__Coproccoccus_eutactus                | 0.24624379   | 0.440405169 | 0.724609819 |
| s__Bifidobacterium_longum            | s__Coproccoccus_eutactus                | 0.381665274  | 0.220867467 | 0.645261321 |
| s__Bifidobacterium_bifidum           | s__Coproccoccus_eutactus                | 0.524499988  | 0.080002751 | 0.564498291 |
| s__Bifidobacterium_pseudocatenulatum | s__Coriobacteriia_bacterium             | -0.230202234 | 0.471653637 | 0.734984411 |
| s__Bifidobacterium_longum            | s__Coriobacteriia_bacterium             | -0.155959939 | 0.628370386 | 0.822712109 |
| s__Bifidobacterium_bifidum           | s__Coriobacteriia_bacterium             | 0.129902775  | 0.687401771 | 0.830418246 |
| s__Bifidobacterium_adolescentis      | s__Coriobacteriia_bacterium             | 0.163757936  | 0.611068017 | 0.80885691  |
| s__Bifidobacterium_catenuatum        | s__Coriobacteriia_bacterium             | 0.6          | 0.03916288  | 0.564498291 |
| s__Bifidobacterium_catenuatum        | s__Coriobacteriia_unclassified_SGB14764 | -0.556726179 | 0.060090882 | 0.564498291 |
| s__Bifidobacterium_bifidum           | s__Coriobacteriia_unclassified_SGB14764 | -0.475247525 | 0.118420573 | 0.596315484 |
| s__Bifidobacterium_longum            | s__Coriobacteriia_unclassified_SGB14764 | -0.370280895 | 0.236096162 | 0.645261321 |
| s__Bifidobacterium_pseudocatenulatum | s__Coriobacteriia_unclassified_SGB14764 | 0            | 1           | 1           |
| s__Bifidobacterium_adolescentis      | s__Coriobacteriia_unclassified_SGB14764 | 0.341157679  | 0.277812017 | 0.660447962 |
| s__Bifidobacterium_longum            | s__Desulfovibrio_piger                  | -0.392416408 | 0.207043295 | 0.645261321 |
| s__Bifidobacterium_catenuatum        | s__Desulfovibrio_piger                  | -0.359662076 | 0.250847879 | 0.645261321 |
| s__Bifidobacterium_bifidum           | s__Desulfovibrio_piger                  | -0.307024383 | 0.33169446  | 0.660447962 |
| s__Bifidobacterium_adolescentis      | s__Desulfovibrio_piger                  | -0.172018152 | 0.59293728  | 0.795634689 |
| s__Bifidobacterium_pseudocatenulatum | s__Desulfovibrio_piger                  | 0.481543412  | 0.1129417   | 0.596315484 |
| s__Bifidobacterium_longum            | s__Desulfovibrionaceae_bacterium        | -0.639692501 | 0.025084403 | 0.527898179 |
| s__Bifidobacterium_pseudocatenulatum | s__Desulfovibrionaceae_bacterium        | -0.525320086 | 0.079446787 | 0.564498291 |
| s__Bifidobacterium_bifidum           | s__Desulfovibrionaceae_bacterium        | -0.307024383 | 0.33169446  | 0.660447962 |
| s__Bifidobacterium_adolescentis      | s__Desulfovibrionaceae_bacterium        | 0.462298782  | 0.130231626 | 0.598875359 |
| s__Bifidobacterium_catenuatum        | s__Desulfovibrionaceae_bacterium        | 0.527504379  | 0.077978868 | 0.564498291 |
| s__Bifidobacterium_adolescentis      | s__Dialister_invisus                    | -0.295656198 | 0.350811021 | 0.669943949 |
| s__Bifidobacterium_catenuatum        | s__Dialister_invisus                    | -0.02997184  | 0.926329449 | 0.952796005 |
| s__Bifidobacterium_pseudocatenulatum | s__Dialister_invisus                    | 0.24624379   | 0.440405169 | 0.724609819 |
| s__Bifidobacterium_longum            | s__Dialister_invisus                    | 0.381665274  | 0.220867467 | 0.645261321 |
| s__Bifidobacterium_bifidum           | s__Dialister_invisus                    | 0.524499988  | 0.080002751 | 0.564498291 |
| s__Bifidobacterium_longum            | s__Dialister_pneumosintes               | -0.305699203 | 0.333893136 | 0.660447962 |
| s__Bifidobacterium_catenuatum        | s__Dialister_pneumosintes               | -0.243492377 | 0.445692547 | 0.724609819 |
| s__Bifidobacterium_bifidum           | s__Dialister_pneumosintes               | -0.20785649  | 0.516822372 | 0.734984411 |
| s__Bifidobacterium_adolescentis      | s__Dialister_pneumosintes               | 0.043671315  | 0.892800448 | 0.941362816 |
| s__Bifidobacterium_pseudocatenulatum | s__Dialister_pneumosintes               | 0.489009647  | 0.106664928 | 0.596315484 |
| s__Bifidobacterium_pseudocatenulatum | s__Dorea_formicigenerans                | -0.441351013 | 0.150914723 | 0.634727557 |
| s__Bifidobacterium_catenuatum        | s__Dorea_formicigenerans                | -0.296323884 | 0.349672359 | 0.669943949 |
| s__Bifidobacterium_adolescentis      | s__Dorea_formicigenerans                | -0.083916084 | 0.800197518 | 0.898764502 |
| s__Bifidobacterium_bifidum           | s__Dorea_formicigenerans                | -0.08320919  | 0.797106041 | 0.896744296 |
| s__Bifidobacterium_longum            | s__Dorea_formicigenerans                | -0.055944056 | 0.868980339 | 0.935025813 |
| s__Bifidobacterium_adolescentis      | s__Dorea_longicatena                    | -0.308231646 | 0.329698291 | 0.660447962 |
| s__Bifidobacterium_catenuatum        | s__Dorea_longicatena                    | -0.078116657 | 0.809315346 | 0.900520907 |
| s__Bifidobacterium_pseudocatenulatum | s__Dorea_longicatena                    | -0.049917297 | 0.877563861 | 0.941362816 |
| s__Bifidobacterium_bifidum           | s__Dorea_longicatena                    | 0.558478789  | 0.059118438 | 0.564498291 |
| s__Bifidobacterium_longum            | s__Dorea_longicatena                    | 0.690018571  | 0.013012243 | 0.527898179 |
| s__Bifidobacterium_longum            | s__Dorea_sp_AF24_7LB                    | -0.341157679 | 0.277812017 | 0.660447962 |
| s__Bifidobacterium_pseudocatenulatum | s__Dorea_sp_AF24_7LB                    | -0.317636965 | 0.314372101 | 0.660447962 |
| s__Bifidobacterium_bifidum           | s__Dorea_sp_AF24_7LB                    | 0.059405941  | 0.854491418 | 0.928154471 |
| s__Bifidobacterium_adolescentis      | s__Dorea_sp_AF24_7LB                    | 0.203862515  | 0.525088085 | 0.740057032 |

|                                      |                                          |              |             |             |
|--------------------------------------|------------------------------------------|--------------|-------------|-------------|
| s__Bifidobacterium_catenuatum        | s__Dorea_sp_AF24_7LB                     | 0.412905249  | 0.182193414 | 0.645261321 |
| s__Bifidobacterium_catenuatum        | s__Dorea_sp_AF36_15AT                    | -0.194854162 | 0.543936956 | 0.758142218 |
| s__Bifidobacterium_bifidum           | s__Dorea_sp_AF36_15AT                    | -0.121287129 | 0.707297403 | 0.844685913 |
| s__Bifidobacterium_adolescentis      | s__Dorea_sp_AF36_15AT                    | -0.058246433 | 0.857305599 | 0.92943342  |
| s__Bifidobacterium_pseudocatenulatum | s__Dorea_sp_AF36_15AT                    | -0.057174654 | 0.859908217 | 0.930828482 |
| s__Bifidobacterium_longum            | s__Dorea_sp_AF36_15AT                    | -0.041604595 | 0.897849624 | 0.944315965 |
| s__Bifidobacterium_pseudocatenulatum | s__Dysosmobacter_sp_NSJ_60               | -0.182203209 | 0.570873166 | 0.783551405 |
| s__Bifidobacterium_adolescentis      | s__Dysosmobacter_sp_NSJ_60               | 0.091789485  | 0.776630219 | 0.882375181 |
| s__Bifidobacterium_longum            | s__Dysosmobacter_sp_NSJ_60               | 0.110147382  | 0.733271494 | 0.861959166 |
| s__Bifidobacterium_bifidum           | s__Dysosmobacter_sp_NSJ_60               | 0.322197586  | 0.307084957 | 0.660447962 |
| s__Bifidobacterium_catenuatum        | s__Dysosmobacter_sp_NSJ_60               | 0.450365081  | 0.141773267 | 0.631216668 |
| s__Bifidobacterium_pseudocatenulatum | s__Dysosmobacter_welbionis               | -0.188405797 | 0.557600139 | 0.773762308 |
| s__Bifidobacterium_adolescentis      | s__Dysosmobacter_welbionis               | -0.185082683 | 0.564695618 | 0.778464418 |
| s__Bifidobacterium_catenuatum        | s__Dysosmobacter_welbionis               | -0.154791158 | 0.630978827 | 0.824723364 |
| s__Bifidobacterium_bifidum           | s__Dysosmobacter_welbionis               | 0.078350451  | 0.808753949 | 0.900520907 |
| s__Bifidobacterium_longum            | s__Dysosmobacter_welbionis               | 0.081863494  | 0.80032839  | 0.898764502 |
| s__Bifidobacterium_adolescentis      | s__Eggerthella_lenta                     | -0.623597854 | 0.030254949 | 0.564498291 |
| s__Bifidobacterium_catenuatum        | s__Eggerthella_lenta                     | 0.032343369  | 0.920515905 | 0.952796005 |
| s__Bifidobacterium_bifidum           | s__Eggerthella_lenta                     | 0.431403334  | 0.1614309   | 0.645261321 |
| s__Bifidobacterium_pseudocatenulatum | s__Eggerthella_lenta                     | 0.59788775   | 0.040041906 | 0.564498291 |
| s__Bifidobacterium_longum            | s__Eggerthella_lenta                     | 0.652602405  | 0.021425722 | 0.527898179 |
| s__Bifidobacterium_longum            | s__Eggerthellaceae_bacterium             | -0.533723297 | 0.073901221 | 0.564498291 |
| s__Bifidobacterium_bifidum           | s__Eggerthellaceae_bacterium             | -0.370829205 | 0.235348779 | 0.645261321 |
| s__Bifidobacterium_pseudocatenulatum | s__Eggerthellaceae_bacterium             | -0.302047835 | 0.339992013 | 0.66474037  |
| s__Bifidobacterium_catenuatum        | s__Eggerthellaceae_bacterium             | 0.108211289  | 0.737812945 | 0.864841382 |
| s__Bifidobacterium_adolescentis      | s__Eggerthellaceae_bacterium             | 0.358303752  | 0.252772913 | 0.645261321 |
| s__Bifidobacterium_adolescentis      | s__Eggerthellaceae_unclassified_SGB14341 | -0.220398257 | 0.491241934 | 0.734984411 |
| s__Bifidobacterium_catenuatum        | s__Eggerthellaceae_unclassified_SGB14341 | 0.02997184   | 0.926329449 | 0.952796005 |
| s__Bifidobacterium_pseudocatenulatum | s__Eggerthellaceae_unclassified_SGB14341 | 0.279076296  | 0.379713602 | 0.705662446 |
| s__Bifidobacterium_longum            | s__Eggerthellaceae_unclassified_SGB14341 | 0.392416408  | 0.207043295 | 0.645261321 |
| s__Bifidobacterium_bifidum           | s__Eggerthellaceae_unclassified_SGB14341 | 0.550085353  | 0.06387644  | 0.564498291 |
| s__Bifidobacterium_pseudocatenulatum | s__Eisenbergiella_massiliensis           | -0.35564338  | 0.256568192 | 0.645261321 |
| s__Bifidobacterium_catenuatum        | s__Eisenbergiella_massiliensis           | -0.243492377 | 0.445692547 | 0.724609819 |
| s__Bifidobacterium_bifidum           | s__Eisenbergiella_massiliensis           | -0.20785649  | 0.516822372 | 0.734984411 |
| s__Bifidobacterium_longum            | s__Eisenbergiella_massiliensis           | -0.131013944 | 0.684848714 | 0.828923516 |
| s__Bifidobacterium_adolescentis      | s__Eisenbergiella_massiliensis           | 0.305699203  | 0.333893136 | 0.660447962 |
| s__Bifidobacterium_adolescentis      | s__Eisenbergiella_tayi                   | -0.425485705 | 0.167901396 | 0.645261321 |
| s__Bifidobacterium_catenuatum        | s__Eisenbergiella_tayi                   | -0.074915508 | 0.817010272 | 0.900641245 |
| s__Bifidobacterium_longum            | s__Eisenbergiella_tayi                   | 0.34710676   | 0.268969367 | 0.660447962 |
| s__Bifidobacterium_bifidum           | s__Eisenbergiella_tayi                   | 0.477414845  | 0.116515173 | 0.596315484 |
| s__Bifidobacterium_pseudocatenulatum | s__Eisenbergiella_tayi                   | 0.615493701  | 0.033129917 | 0.564498291 |
| s__Bifidobacterium_catenuatum        | s__Enterocloster_aldensis                | -0.391304348 | 0.208448128 | 0.645261321 |
| s__Bifidobacterium_bifidum           | s__Enterocloster_aldensis                | -0.027836309 | 0.931567308 | 0.954847805 |
| s__Bifidobacterium_adolescentis      | s__Enterocloster_aldensis                | -0.015595994 | 0.961631678 | 0.973217602 |
| s__Bifidobacterium_pseudocatenulatum | s__Enterocloster_aldensis                | 0.277830283  | 0.381933946 | 0.706464564 |
| s__Bifidobacterium_longum            | s__Enterocloster_aldensis                | 0.335313869  | 0.286657858 | 0.660447962 |
| s__Bifidobacterium_catenuatum        | s__Enterocloster_asparagiformis          | -0.47826087  | 0.115776907 | 0.596315484 |
| s__Bifidobacterium_bifidum           | s__Enterocloster_asparagiformis          | -0.315478168 | 0.317854507 | 0.660447962 |
| s__Bifidobacterium_pseudocatenulatum | s__Enterocloster_asparagiformis          | 0.067473069  | 0.834956805 | 0.914027432 |
| s__Bifidobacterium_longum            | s__Enterocloster_asparagiformis          | 0.140363945  | 0.663487858 | 0.828923516 |
| s__Bifidobacterium_adolescentis      | s__Enterocloster_asparagiformis          | 0.233939909  | 0.464282613 | 0.734984411 |
| s__Bifidobacterium_pseudocatenulatum | s__Enterocloster_bolteae                 | -0.324462434 | 0.303501357 | 0.660447962 |
| s__Bifidobacterium_longum            | s__Enterocloster_bolteae                 | -0.136602661 | 0.672054217 | 0.828923516 |
| s__Bifidobacterium_bifidum           | s__Enterocloster_bolteae                 | -0.079187291 | 0.806745176 | 0.900520907 |
| s__Bifidobacterium_adolescentis      | s__Enterocloster_bolteae                 | -0.035026323 | 0.913943253 | 0.952796005 |
| s__Bifidobacterium_catenuatum        | s__Enterocloster_bolteae                 | 0.398394949  | 0.19958989  | 0.645261321 |
| s__Bifidobacterium_bifidum           | s__Enterocloster_citroniae               | -0.295392624 | 0.351261058 | 0.669943949 |
| s__Bifidobacterium_longum            | s__Enterocloster_citroniae               | -0.181818182 | 0.572958221 | 0.784703651 |
| s__Bifidobacterium_pseudocatenulatum | s__Enterocloster_citroniae               | -0.131693447 | 0.683288955 | 0.828923516 |
| s__Bifidobacterium_adolescentis      | s__Enterocloster_citroniae               | -0.111888112 | 0.732775446 | 0.861959166 |
| s__Bifidobacterium_catenuatum        | s__Enterocloster_citroniae               | 0.023393991  | 0.94247084  | 0.961549197 |
| s__Bifidobacterium_catenuatum        | s__Enterocloster_clostridioformis        | -0.347953862 | 0.267723614 | 0.660447962 |
| s__Bifidobacterium_pseudocatenulatum | s__Enterocloster_clostridioformis        | -0.317636965 | 0.314372101 | 0.660447962 |
| s__Bifidobacterium_bifidum           | s__Enterocloster_clostridioformis        | 0.059405941  | 0.854491418 | 0.928154471 |
| s__Bifidobacterium_longum            | s__Enterocloster_clostridioformis        | 0.195541596  | 0.542488694 | 0.757497936 |
| s__Bifidobacterium_adolescentis      | s__Enterocloster_clostridioformis        | 0.336997219  | 0.28409356  | 0.660447962 |
| s__Bifidobacterium_catenuatum        | s__Enterocloster_lavalensis              | -0.105115948 | 0.745089576 | 0.869271172 |
| s__Bifidobacterium_pseudocatenulatum | s__Enterocloster_lavalensis              | -0.011071995 | 0.972756965 | 0.980731707 |
| s__Bifidobacterium_bifidum           | s__Enterocloster_lavalensis              | 0.099222767  | 0.758996038 | 0.875764659 |
| s__Bifidobacterium_longum            | s__Enterocloster_lavalensis              | 0.195780722  | 0.541985293 | 0.757497936 |



|                                      |                                  |              |             |             |
|--------------------------------------|----------------------------------|--------------|-------------|-------------|
| s__Bifidobacterium_adolescentis      | s__Enterocloster_lavalensis      | 0.224785273  | 0.482431644 | 0.734984411 |
| s__Bifidobacterium_longum            | s__Enterococcus_avium            | -0.639692501 | 0.025084403 | 0.527898179 |
| s__Bifidobacterium_pseudocatenulatum | s__Enterococcus_avium            | -0.525320086 | 0.079446787 | 0.564498291 |
| s__Bifidobacterium_bifidum           | s__Enterococcus_avium            | -0.307024383 | 0.33169446  | 0.660447962 |
| s__Bifidobacterium_adolescentis      | s__Enterococcus_avium            | 0.462298782  | 0.130231626 | 0.598875359 |
| s__Bifidobacterium_catenulatum       | s__Enterococcus_avium            | 0.527504379  | 0.077978868 | 0.564498291 |
| s__Bifidobacterium_longum            | s__Enterococcus_casseliflavus    | -0.381665274 | 0.220867467 | 0.645261321 |
| s__Bifidobacterium_catenulatum       | s__Enterococcus_casseliflavus    | -0.359662076 | 0.250847879 | 0.645261321 |
| s__Bifidobacterium_bifidum           | s__Enterococcus_casseliflavus    | -0.307024383 | 0.33169446  | 0.660447962 |
| s__Bifidobacterium_adolescentis      | s__Enterococcus_casseliflavus    | -0.215022689 | 0.502135449 | 0.734984411 |
| s__Bifidobacterium_pseudocatenulatum | s__Enterococcus_casseliflavus    | 0.437766738  | 0.154651873 | 0.634727557 |
| s__Bifidobacterium_longum            | s__Enterococcus_faecalis         | -0.639692501 | 0.025084403 | 0.527898179 |
| s__Bifidobacterium_pseudocatenulatum | s__Enterococcus_faecalis         | -0.525320086 | 0.079446787 | 0.564498291 |
| s__Bifidobacterium_bifidum           | s__Enterococcus_faecalis         | -0.307024383 | 0.33169446  | 0.660447962 |
| s__Bifidobacterium_adolescentis      | s__Enterococcus_faecalis         | 0.462298782  | 0.130231626 | 0.598875359 |
| s__Bifidobacterium_catenulatum       | s__Enterococcus_faecalis         | 0.527504379  | 0.077978868 | 0.564498291 |
| s__Bifidobacterium_longum            | s__Enterococcus_faecium          | -0.392416408 | 0.207043295 | 0.645261321 |
| s__Bifidobacterium_catenulatum       | s__Enterococcus_faecium          | -0.359662076 | 0.250847879 | 0.645261321 |
| s__Bifidobacterium_bifidum           | s__Enterococcus_faecium          | -0.307024383 | 0.33169446  | 0.660447962 |
| s__Bifidobacterium_adolescentis      | s__Enterococcus_faecium          | -0.172018152 | 0.59293728  | 0.795634689 |
| s__Bifidobacterium_pseudocatenulatum | s__Enterococcus_faecium          | 0.481543412  | 0.1129417   | 0.596315484 |
| s__Bifidobacterium_longum            | s__Enterococcus_gilvus           | -0.393041832 | 0.206255757 | 0.645261321 |
| s__Bifidobacterium_pseudocatenulatum | s__Enterococcus_gilvus           | -0.35564338  | 0.256568192 | 0.645261321 |
| s__Bifidobacterium_bifidum           | s__Enterococcus_gilvus           | -0.20785649  | 0.516822372 | 0.734984411 |
| s__Bifidobacterium_adolescentis      | s__Enterococcus_gilvus           | 0.393041832  | 0.206255757 | 0.645261321 |
| s__Bifidobacterium_catenulatum       | s__Enterococcus_gilvus           | 0.535683229  | 0.07264704  | 0.564498291 |
| s__Bifidobacterium_catenulatum       | s__Erysipelatoclostridium_amosum | -0.243492377 | 0.445692547 | 0.724609819 |
| s__Bifidobacterium_bifidum           | s__Erysipelatoclostridium_amosum | -0.20785649  | 0.516822372 | 0.734984411 |
| s__Bifidobacterium_adolescentis      | s__Erysipelatoclostridium_amosum | -0.131013944 | 0.684848714 | 0.828923516 |
| s__Bifidobacterium_longum            | s__Erysipelatoclostridium_amosum | 0.131013944  | 0.684848714 | 0.828923516 |
| s__Bifidobacterium_pseudocatenulatum | s__Erysipelatoclostridium_amosum | 0.400098802  | 0.197496288 | 0.645261321 |
| s__Bifidobacterium_catenulatum       | s__Escherichia_coli              | -0.335901624 | 0.285761027 | 0.660447962 |
| s__Bifidobacterium_pseudocatenulatum | s__Escherichia_coli              | -0.106965637 | 0.740738925 | 0.865709392 |
| s__Bifidobacterium_adolescentis      | s__Escherichia_coli              | 0.084063176  | 0.795062624 | 0.896045533 |
| s__Bifidobacterium_bifidum           | s__Escherichia_coli              | 0.275071643  | 0.386873452 | 0.706464564 |
| s__Bifidobacterium_longum            | s__Escherichia_coli              | 0.437829043  | 0.154586412 | 0.634727557 |
| s__Bifidobacterium_adolescentis      | s__Escherichia_marmotae          | -0.204271555 | 0.524238954 | 0.740057032 |
| s__Bifidobacterium_pseudocatenulatum | s__Escherichia_marmotae          | -0.136802106 | 0.67159907  | 0.828923516 |
| s__Bifidobacterium_catenulatum       | s__Escherichia_marmotae          | 0.569464954  | 0.053270987 | 0.564498291 |
| s__Bifidobacterium_longum            | s__Escherichia_marmotae          | 0.650443636  | 0.022008557 | 0.527898179 |
| s__Bifidobacterium_bifidum           | s__Escherichia_marmotae          | 0.678012179  | 0.015382136 | 0.527898179 |
| s__Bifidobacterium_adolescentis      | s__Eubacteriaceae_bacterium      | -0.557501573 | 0.05965929  | 0.564498291 |
| s__Bifidobacterium_catenulatum       | s__Eubacteriaceae_bacterium      | -0.347953862 | 0.267723614 | 0.660447962 |
| s__Bifidobacterium_bifidum           | s__Eubacteriaceae_bacterium      | 0.059405941  | 0.854491418 | 0.928154471 |
| s__Bifidobacterium_longum            | s__Eubacteriaceae_bacterium      | 0.295392624  | 0.351261058 | 0.669943949 |
| s__Bifidobacterium_pseudocatenulatum | s__Eubacteriaceae_bacterium      | 0.563276218  | 0.05651267  | 0.564498291 |
| s__Bifidobacterium_pseudocatenulatum | s__Eubacterium_callanderi        | -0.525320086 | 0.079446787 | 0.564498291 |
| s__Bifidobacterium_catenulatum       | s__Eubacterium_callanderi        | -0.359662076 | 0.250847879 | 0.645261321 |
| s__Bifidobacterium_bifidum           | s__Eubacterium_callanderi        | -0.307024383 | 0.33169446  | 0.660447962 |
| s__Bifidobacterium_longum            | s__Eubacterium_callanderi        | -0.075257941 | 0.816186409 | 0.900520907 |
| s__Bifidobacterium_adolescentis      | s__Eubacterium_callanderi        | 0.569810127  | 0.05309411  | 0.564498291 |
| s__Bifidobacterium_catenulatum       | s__Eubacterium_ramulus           | -0.556726179 | 0.060090882 | 0.564498291 |
| s__Bifidobacterium_bifidum           | s__Eubacterium_ramulus           | -0.475247525 | 0.118420573 | 0.596315484 |
| s__Bifidobacterium_adolescentis      | s__Eubacterium_ramulus           | -0.407725031 | 0.188291509 | 0.645261321 |
| s__Bifidobacterium_longum            | s__Eubacterium_ramulus           | -0.153937001 | 0.632887549 | 0.825827492 |
| s__Bifidobacterium_pseudocatenulatum | s__Eubacterium_ramulus           | 0.298578747  | 0.345841551 | 0.669943949 |
| s__Bifidobacterium_catenulatum       | s__Eubacterium_rectale           | -0.243492377 | 0.445692547 | 0.724609819 |
| s__Bifidobacterium_bifidum           | s__Eubacterium_rectale           | -0.20785649  | 0.516822372 | 0.734984411 |
| s__Bifidobacterium_adolescentis      | s__Eubacterium_rectale           | -0.131013944 | 0.684848714 | 0.828923516 |
| s__Bifidobacterium_longum            | s__Eubacterium_rectale           | 0.131013944  | 0.684848714 | 0.828923516 |
| s__Bifidobacterium_pseudocatenulatum | s__Eubacterium_rectale           | 0.400098802  | 0.197496288 | 0.645261321 |
| s__Bifidobacterium_adolescentis      | s__Eubacterium_sp_AM28_29        | -0.393041832 | 0.206255757 | 0.645261321 |
| s__Bifidobacterium_catenulatum       | s__Eubacterium_sp_AM28_29        | -0.243492377 | 0.445692547 | 0.724609819 |
| s__Bifidobacterium_bifidum           | s__Eubacterium_sp_AM28_29        | -0.20785649  | 0.516822372 | 0.734984411 |
| s__Bifidobacterium_longum            | s__Eubacterium_sp_AM28_29        | -0.043671315 | 0.892800448 | 0.941362816 |
| s__Bifidobacterium_pseudocatenulatum | s__Eubacterium_sp_AM28_29        | 0.222277112  | 0.487459832 | 0.734984411 |
| s__Bifidobacterium_bifidum           | s__Evtepia_gabavorous            | -0.475247525 | 0.118420573 | 0.596315484 |
| s__Bifidobacterium_longum            | s__Evtepia_gabavorous            | -0.341157679 | 0.277812017 | 0.660447962 |
| s__Bifidobacterium_catenulatum       | s__Evtepia_gabavorous            | -0.315478168 | 0.317854507 | 0.660447962 |
| s__Bifidobacterium_pseudocatenulatum | s__Evtepia_gabavorous            | -0.169406381 | 0.598647546 | 0.79832559  |

|                                      |                                    |              |             |             |
|--------------------------------------|------------------------------------|--------------|-------------|-------------|
| s__Bifidobacterium_adolescentis      | s__Evtapia_gabavorous              | 0.116492866  | 0.718442643 | 0.852389576 |
| s__Bifidobacterium_adolescentis      | s__Faecalibacterium_prausnitzii    | -0.57043668  | 0.052774096 | 0.564498291 |
| s__Bifidobacterium_catenuatum        | s__Faecalibacterium_prausnitzii    | -0.125649715 | 0.697201253 | 0.837439065 |
| s__Bifidobacterium_pseudocatenulatum | s__Faecalibacterium_prausnitzii    | 0.172052957  | 0.592861324 | 0.795634689 |
| s__Bifidobacterium_bifidum           | s__Faecalibacterium_prausnitzii    | 0.456695002  | 0.135572233 | 0.605748274 |
| s__Bifidobacterium_longum            | s__Faecalibacterium_prausnitzii    | 0.514097255  | 0.087286385 | 0.585004498 |
| s__Bifidobacterium_pseudocatenulatum | s__Faecalibacterium_SGB15346       | -0.525320086 | 0.079446787 | 0.564498291 |
| s__Bifidobacterium_longum            | s__Faecalibacterium_SGB15346       | -0.430045379 | 0.16290152  | 0.645261321 |
| s__Bifidobacterium_bifidum           | s__Faecalibacterium_SGB15346       | -0.307024383 | 0.33169446  | 0.660447962 |
| s__Bifidobacterium_catenuatum        | s__Faecalibacterium_SGB15346       | -0.095909887 | 0.766842774 | 0.87977919  |
| s__Bifidobacterium_adolescentis      | s__Faecalibacterium_SGB15346       | 0.392416408  | 0.207043295 | 0.645261321 |
| s__Bifidobacterium_longum            | s__Faecalicatena_contorta          | -0.611587546 | 0.034583347 | 0.564498291 |
| s__Bifidobacterium_bifidum           | s__Faecalicatena_contorta          | -0.475247525 | 0.118420573 | 0.596315484 |
| s__Bifidobacterium_pseudocatenulatum | s__Faecalicatena_contorta          | -0.207522817 | 0.517510745 | 0.73513364  |
| s__Bifidobacterium_adolescentis      | s__Faecalicatena_contorta          | 0.199702056  | 0.533758274 | 0.748925863 |
| s__Bifidobacterium_catenuatum        | s__Faecalicatena_contorta          | 0.204132932  | 0.524526657 | 0.740057032 |
| s__Bifidobacterium_longum            | s__Faecalicatena_fissicatena       | -0.177393719 | 0.58125109  | 0.790903212 |
| s__Bifidobacterium_pseudocatenulatum | s__Faecalicatena_fissicatena       | -0.073873137 | 0.819519161 | 0.901828946 |
| s__Bifidobacterium_bifidum           | s__Faecalicatena_fissicatena       | 0.150314021  | 0.641006322 | 0.828923516 |
| s__Bifidobacterium_adolescentis      | s__Faecalicatena_fissicatena       | 0.263402795  | 0.408125175 | 0.724609819 |
| s__Bifidobacterium_catenuatum        | s__Faecalicatena_fissicatena       | 0.281735293  | 0.374997761 | 0.702965264 |
| s__Bifidobacterium_catenuatum        | s__Faecalicatena_orotica           | -0.243492377 | 0.445692547 | 0.724609819 |
| s__Bifidobacterium_bifidum           | s__Faecalicatena_orotica           | -0.20785649  | 0.516822372 | 0.734984411 |
| s__Bifidobacterium_adolescentis      | s__Faecalicatena_orotica           | -0.131013944 | 0.684848714 | 0.828923516 |
| s__Bifidobacterium_longum            | s__Faecalicatena_orotica           | 0.131013944  | 0.684848714 | 0.828923516 |
| s__Bifidobacterium_pseudocatenulatum | s__Faecalicatena_orotica           | 0.400098802  | 0.197496288 | 0.645261321 |
| s__Bifidobacterium_pseudocatenulatum | s__Firmicutes_bacterium_AF16_15    | -0.532593996 | 0.074630572 | 0.564498291 |
| s__Bifidobacterium_catenuatum        | s__Firmicutes_bacterium_AF16_15    | -0.09212013  | 0.775843697 | 0.882375181 |
| s__Bifidobacterium_bifidum           | s__Firmicutes_bacterium_AF16_15    | -0.032765856 | 0.91948059  | 0.952796005 |
| s__Bifidobacterium_longum            | s__Firmicutes_bacterium_AF16_15    | 0.229473714  | 0.473096624 | 0.734984411 |
| s__Bifidobacterium_adolescentis      | s__Firmicutes_bacterium_AF16_15    | 0.339621096  | 0.28012265  | 0.660447962 |
| s__Bifidobacterium_adolescentis      | s__Flavonifractor_plautii          | -0.373248692 | 0.232067671 | 0.645261321 |
| s__Bifidobacterium_catenuatum        | s__Flavonifractor_plautii          | -0.259152536 | 0.416008004 | 0.724609819 |
| s__Bifidobacterium_pseudocatenulatum | s__Flavonifractor_plautii          | 0.136208591  | 0.672953811 | 0.828923516 |
| s__Bifidobacterium_bifidum           | s__Flavonifractor_plautii          | 0.230442432  | 0.471178322 | 0.734984411 |
| s__Bifidobacterium_longum            | s__Flavonifractor_plautii          | 0.302824411  | 0.338689908 | 0.663719211 |
| s__Bifidobacterium_adolescentis      | s__Fusicatenibacter_saccharivorans | -0.644230107 | 0.023750527 | 0.527898179 |
| s__Bifidobacterium_catenuatum        | s__Fusicatenibacter_saccharivorans | -0.250047255 | 0.433146206 | 0.724609819 |
| s__Bifidobacterium_bifidum           | s__Fusicatenibacter_saccharivorans | 0.103761409  | 0.748279937 | 0.870574996 |
| s__Bifidobacterium_longum            | s__Fusicatenibacter_saccharivorans | 0.288301871  | 0.363483047 | 0.685611736 |
| s__Bifidobacterium_pseudocatenulatum | s__Fusicatenibacter_saccharivorans | 0.625        | 0.029776397 | 0.564498291 |
| s__Bifidobacterium_catenuatum        | s__Gemmiger_formicilis             | -0.155959939 | 0.628370386 | 0.822712109 |
| s__Bifidobacterium_adolescentis      | s__Gemmiger_formicilis             | -0.153846154 | 0.635139955 | 0.82673176  |
| s__Bifidobacterium_pseudocatenulatum | s__Gemmiger_formicilis             | 0.017796412  | 0.956222632 | 0.970862624 |
| s__Bifidobacterium_bifidum           | s__Gemmiger_formicilis             | 0.270429867  | 0.39525819  | 0.712482574 |
| s__Bifidobacterium_longum            | s__Gemmiger_formicilis             | 0.440559441  | 0.15421575  | 0.634727557 |
| s__Bifidobacterium_longum            | s__GGB1247_SGB1668                 | -0.480384461 | 0.113937412 | 0.596315484 |
| s__Bifidobacterium_pseudocatenulatum | s__GGB1247_SGB1668                 | -0.35564338  | 0.256568192 | 0.645261321 |
| s__Bifidobacterium_bifidum           | s__GGB1247_SGB1668                 | -0.20785649  | 0.516822372 | 0.734984411 |
| s__Bifidobacterium_catenuatum        | s__GGB1247_SGB1668                 | 0.146095426  | 0.650505463 | 0.828923516 |
| s__Bifidobacterium_adolescentis      | s__GGB1247_SGB1668                 | 0.218356573  | 0.49536676  | 0.734984411 |
| s__Bifidobacterium_longum            | s__GGB1270_SGB1705                 | -0.503415599 | 0.095219206 | 0.596315484 |
| s__Bifidobacterium_bifidum           | s__GGB1270_SGB1705                 | -0.475247525 | 0.118420573 | 0.596315484 |
| s__Bifidobacterium_pseudocatenulatum | s__GGB1270_SGB1705                 | -0.131289946 | 0.684215033 | 0.828923516 |
| s__Bifidobacterium_adolescentis      | s__GGB1270_SGB1705                 | 0.095690568  | 0.76736296  | 0.87977919  |
| s__Bifidobacterium_catenuatum        | s__GGB1270_SGB1705                 | 0.204132932  | 0.524526657 | 0.740057032 |
| s__Bifidobacterium_longum            | s__GGB1379_SGB1880                 | -0.381665274 | 0.220867467 | 0.645261321 |
| s__Bifidobacterium_catenuatum        | s__GGB1379_SGB1880                 | -0.359662076 | 0.250847879 | 0.645261321 |
| s__Bifidobacterium_bifidum           | s__GGB1379_SGB1880                 | -0.307024383 | 0.33169446  | 0.660447962 |
| s__Bifidobacterium_adolescentis      | s__GGB1379_SGB1880                 | -0.215022689 | 0.502135449 | 0.734984411 |
| s__Bifidobacterium_pseudocatenulatum | s__GGB1379_SGB1880                 | 0.437766738  | 0.154651873 | 0.634727557 |
| s__Bifidobacterium_adolescentis      | s__GGB1387_SGB1895                 | -0.370914139 | 0.235233133 | 0.645261321 |
| s__Bifidobacterium_catenuatum        | s__GGB1387_SGB1895                 | -0.359662076 | 0.250847879 | 0.645261321 |
| s__Bifidobacterium_bifidum           | s__GGB1387_SGB1895                 | -0.307024383 | 0.33169446  | 0.660447962 |
| s__Bifidobacterium_longum            | s__GGB1387_SGB1895                 | 0.075257941  | 0.816186409 | 0.900520907 |
| s__Bifidobacterium_pseudocatenulatum | s__GGB1387_SGB1895                 | 0.470599244  | 0.122575961 | 0.596315484 |
| s__Bifidobacterium_adolescentis      | s__GGB1662_SGB2276                 | -0.220398257 | 0.491241934 | 0.734984411 |
| s__Bifidobacterium_catenuatum        | s__GGB1662_SGB2276                 | 0.02997184   | 0.926329449 | 0.952796005 |
| s__Bifidobacterium_pseudocatenulatum | s__GGB1662_SGB2276                 | 0.279076296  | 0.379713602 | 0.705662446 |
| s__Bifidobacterium_longum            | s__GGB1662_SGB2276                 | 0.392416408  | 0.207043295 | 0.645261321 |

|                                      |                      |              |             |             |
|--------------------------------------|----------------------|--------------|-------------|-------------|
| s__Bifidobacterium_bifidum           | s__GGB1662_SGB2276   | 0.550085353  | 0.06387644  | 0.564498291 |
| s__Bifidobacterium_adolescentis      | s__GGB1689_SGB2321   | -0.295656198 | 0.350811021 | 0.669943949 |
| s__Bifidobacterium_catenuatum        | s__GGB1689_SGB2321   | -0.02997184  | 0.926329449 | 0.952796005 |
| s__Bifidobacterium_pseudocatenulatum | s__GGB1689_SGB2321   | 0.24624379   | 0.440405169 | 0.724609819 |
| s__Bifidobacterium_longum            | s__GGB1689_SGB2321   | 0.381665274  | 0.220867467 | 0.645261321 |
| s__Bifidobacterium_bifidum           | s__GGB1689_SGB2321   | 0.524499988  | 0.080002751 | 0.564498291 |
| s__Bifidobacterium_pseudocatenulatum | s__GGB2980_SGB3962   | -0.50923461  | 0.090839995 | 0.596315484 |
| s__Bifidobacterium_longum            | s__GGB2980_SGB3962   | -0.156042125 | 0.628187113 | 0.822712109 |
| s__Bifidobacterium_bifidum           | s__GGB2980_SGB3962   | 0.02730488   | 0.932871149 | 0.954847805 |
| s__Bifidobacterium_adolescentis      | s__GGB2980_SGB3962   | 0.183578971  | 0.567918269 | 0.781197619 |
| s__Bifidobacterium_catenuatum        | s__GGB2980_SGB3962   | 0.624369771  | 0.029990815 | 0.564498291 |
| s__Bifidobacterium_pseudocatenulatum | s__GGB3005_SGB3996   | -0.35564338  | 0.256568192 | 0.645261321 |
| s__Bifidobacterium_catenuatum        | s__GGB3005_SGB3996   | -0.243492377 | 0.445692547 | 0.724609819 |
| s__Bifidobacterium_bifidum           | s__GGB3005_SGB3996   | -0.20785649  | 0.516822372 | 0.734984411 |
| s__Bifidobacterium_longum            | s__GGB3005_SGB3996   | -0.131013944 | 0.684848714 | 0.828923516 |
| s__Bifidobacterium_adolescentis      | s__GGB3005_SGB3996   | 0.305699203  | 0.333893136 | 0.660447962 |
| s__Bifidobacterium_pseudocatenulatum | s__GGB3256_SGB4303   | -0.525320086 | 0.079446787 | 0.564498291 |
| s__Bifidobacterium_catenuatum        | s__GGB3256_SGB4303   | -0.359662076 | 0.250847879 | 0.645261321 |
| s__Bifidobacterium_bifidum           | s__GGB3256_SGB4303   | -0.307024383 | 0.33169446  | 0.660447962 |
| s__Bifidobacterium_longum            | s__GGB3256_SGB4303   | -0.075257941 | 0.816186409 | 0.900520907 |
| s__Bifidobacterium_adolescentis      | s__GGB3256_SGB4303   | 0.569810127  | 0.05309411  | 0.564498291 |
| s__Bifidobacterium_longum            | s__GGB3293_SGB4348   | -0.393041832 | 0.206255757 | 0.645261321 |
| s__Bifidobacterium_pseudocatenulatum | s__GGB3293_SGB4348   | -0.35564338  | 0.256568192 | 0.645261321 |
| s__Bifidobacterium_bifidum           | s__GGB3293_SGB4348   | -0.20785649  | 0.516822372 | 0.734984411 |
| s__Bifidobacterium_adolescentis      | s__GGB3293_SGB4348   | 0.393041832  | 0.206255757 | 0.645261321 |
| s__Bifidobacterium_catenuatum        | s__GGB3293_SGB4348   | 0.535683229  | 0.07264704  | 0.564498291 |
| s__Bifidobacterium_catenuatum        | s__GGB3343_SGB4423   | -0.359662076 | 0.250847879 | 0.645261321 |
| s__Bifidobacterium_bifidum           | s__GGB3343_SGB4423   | -0.307024383 | 0.33169446  | 0.660447962 |
| s__Bifidobacterium_longum            | s__GGB3343_SGB4423   | -0.016126702 | 0.960326954 | 0.973217602 |
| s__Bifidobacterium_pseudocatenulatum | s__GGB3343_SGB4423   | -0.013680211 | 0.966342256 | 0.977200034 |
| s__Bifidobacterium_adolescentis      | s__GGB3343_SGB4423   | 0.15589145   | 0.628523131 | 0.822712109 |
| s__Bifidobacterium_longum            | s__GGB34228_SGB72916 | -0.480384461 | 0.113937412 | 0.596315484 |
| s__Bifidobacterium_pseudocatenulatum | s__GGB34228_SGB72916 | -0.35564338  | 0.256568192 | 0.645261321 |
| s__Bifidobacterium_bifidum           | s__GGB34228_SGB72916 | -0.20785649  | 0.516822372 | 0.734984411 |
| s__Bifidobacterium_catenuatum        | s__GGB34228_SGB72916 | 0.146095426  | 0.650505463 | 0.828923516 |
| s__Bifidobacterium_adolescentis      | s__GGB34228_SGB72916 | 0.218356573  | 0.49536676  | 0.734984411 |
| s__Bifidobacterium_pseudocatenulatum | s__GGB3510_SGB4687   | -0.35564338  | 0.256568192 | 0.645261321 |
| s__Bifidobacterium_catenuatum        | s__GGB3510_SGB4687   | -0.243492377 | 0.445692547 | 0.724609819 |
| s__Bifidobacterium_bifidum           | s__GGB3510_SGB4687   | -0.20785649  | 0.516822372 | 0.734984411 |
| s__Bifidobacterium_longum            | s__GGB3510_SGB4687   | 0.043671315  | 0.892800448 | 0.941362816 |
| s__Bifidobacterium_adolescentis      | s__GGB3510_SGB4687   | 0.480384461  | 0.113937412 | 0.596315484 |
| s__Bifidobacterium_longum            | s__GGB3537_SGB4727   | -0.393041832 | 0.206255757 | 0.645261321 |
| s__Bifidobacterium_pseudocatenulatum | s__GGB3537_SGB4727   | -0.35564338  | 0.256568192 | 0.645261321 |
| s__Bifidobacterium_bifidum           | s__GGB3537_SGB4727   | -0.20785649  | 0.516822372 | 0.734984411 |
| s__Bifidobacterium_adolescentis      | s__GGB3537_SGB4727   | 0.393041832  | 0.206255757 | 0.645261321 |
| s__Bifidobacterium_catenuatum        | s__GGB3537_SGB4727   | 0.535683229  | 0.07264704  | 0.564498291 |
| s__Bifidobacterium_longum            | s__GGB3746_SGB5089   | -0.305699203 | 0.333893136 | 0.660447962 |
| s__Bifidobacterium_catenuatum        | s__GGB3746_SGB5089   | -0.243492377 | 0.445692547 | 0.724609819 |
| s__Bifidobacterium_bifidum           | s__GGB3746_SGB5089   | -0.20785649  | 0.516822372 | 0.734984411 |
| s__Bifidobacterium_adolescentis      | s__GGB3746_SGB5089   | 0.043671315  | 0.892800448 | 0.941362816 |
| s__Bifidobacterium_pseudocatenulatum | s__GGB3746_SGB5089   | 0.489009647  | 0.106664928 | 0.596315484 |
| s__Bifidobacterium_longum            | s__GGB3817_SGB5182   | -0.480384461 | 0.113937412 | 0.596315484 |
| s__Bifidobacterium_pseudocatenulatum | s__GGB3817_SGB5182   | -0.35564338  | 0.256568192 | 0.645261321 |
| s__Bifidobacterium_bifidum           | s__GGB3817_SGB5182   | -0.20785649  | 0.516822372 | 0.734984411 |
| s__Bifidobacterium_catenuatum        | s__GGB3817_SGB5182   | 0.146095426  | 0.650505463 | 0.828923516 |
| s__Bifidobacterium_adolescentis      | s__GGB3817_SGB5182   | 0.218356573  | 0.49536676  | 0.734984411 |
| s__Bifidobacterium_adolescentis      | s__GGB38171_SGB72433 | -0.220398257 | 0.491241934 | 0.734984411 |
| s__Bifidobacterium_catenuatum        | s__GGB38171_SGB72433 | 0.02997184   | 0.926329449 | 0.952796005 |
| s__Bifidobacterium_pseudocatenulatum | s__GGB38171_SGB72433 | 0.279076296  | 0.379713602 | 0.705662446 |
| s__Bifidobacterium_longum            | s__GGB38171_SGB72433 | 0.392416408  | 0.207043295 | 0.645261321 |
| s__Bifidobacterium_bifidum           | s__GGB38171_SGB72433 | 0.550085353  | 0.06387644  | 0.564498291 |
| s__Bifidobacterium_adolescentis      | s__GGB45432_SGB63101 | 0.131013944  | 0.684848714 | 0.828923516 |
| s__Bifidobacterium_catenuatum        | s__GGB45432_SGB63101 | 0.243492377  | 0.445692547 | 0.724609819 |
| s__Bifidobacterium_longum            | s__GGB45432_SGB63101 | 0.305699203  | 0.333893136 | 0.660447962 |
| s__Bifidobacterium_pseudocatenulatum | s__GGB45432_SGB63101 | 0.311187957  | 0.324837832 | 0.660447962 |
| s__Bifidobacterium_bifidum           | s__GGB45432_SGB63101 | 0.467677102  | 0.12523656  | 0.598714546 |
| s__Bifidobacterium_adolescentis      | s__GGB4651_SGB6438   | -0.480384461 | 0.113937412 | 0.596315484 |
| s__Bifidobacterium_catenuatum        | s__GGB4651_SGB6438   | -0.243492377 | 0.445692547 | 0.724609819 |
| s__Bifidobacterium_pseudocatenulatum | s__GGB4651_SGB6438   | 0.044455422  | 0.890885751 | 0.941362816 |
| s__Bifidobacterium_longum            | s__GGB4651_SGB6438   | 0.218356573  | 0.49536676  | 0.734984411 |

|                                      |                      |              |             |             |
|--------------------------------------|----------------------|--------------|-------------|-------------|
| s__Bifidobacterium_bifidum           | s__GGB4651_SGB6438   | 0.259820612  | 0.414763969 | 0.724609819 |
| s__Bifidobacterium_longum            | s__GGB51960_SGB72480 | -0.305699203 | 0.333893136 | 0.660447962 |
| s__Bifidobacterium_catenuatum        | s__GGB51960_SGB72480 | -0.243492377 | 0.445692547 | 0.724609819 |
| s__Bifidobacterium_bifidum           | s__GGB51960_SGB72480 | -0.20785649  | 0.516822372 | 0.734984411 |
| s__Bifidobacterium_adolescentis      | s__GGB51960_SGB72480 | 0.043671315  | 0.892800448 | 0.941362816 |
| s__Bifidobacterium_pseudocatenulatum | s__GGB51960_SGB72480 | 0.489009647  | 0.106664928 | 0.596315484 |
| s__Bifidobacterium_adolescentis      | s__GGB58485_SGB80143 | -0.305699203 | 0.333893136 | 0.660447962 |
| s__Bifidobacterium_catenuatum        | s__GGB58485_SGB80143 | -0.243492377 | 0.445692547 | 0.724609819 |
| s__Bifidobacterium_longum            | s__GGB58485_SGB80143 | -0.218356573 | 0.49536676  | 0.734984411 |
| s__Bifidobacterium_bifidum           | s__GGB58485_SGB80143 | -0.20785649  | 0.516822372 | 0.734984411 |
| s__Bifidobacterium_pseudocatenulatum | s__GGB58485_SGB80143 | 0.133366267  | 0.679453948 | 0.828923516 |
| s__Bifidobacterium_pseudocatenulatum | s__GGB6561_SGB9269   | -0.525320086 | 0.079446787 | 0.564498291 |
| s__Bifidobacterium_catenuatum        | s__GGB6561_SGB9269   | -0.359662076 | 0.250847879 | 0.645261321 |
| s__Bifidobacterium_bifidum           | s__GGB6561_SGB9269   | -0.307024383 | 0.33169446  | 0.660447962 |
| s__Bifidobacterium_longum            | s__GGB6561_SGB9269   | -0.075257941 | 0.816186409 | 0.900520907 |
| s__Bifidobacterium_adolescentis      | s__GGB6561_SGB9269   | 0.569810127  | 0.05309411  | 0.564498291 |
| s__Bifidobacterium_adolescentis      | s__GGB6566_SGB9275   | -0.403167543 | 0.193759757 | 0.645261321 |
| s__Bifidobacterium_catenuatum        | s__GGB6566_SGB9275   | -0.359662076 | 0.250847879 | 0.645261321 |
| s__Bifidobacterium_bifidum           | s__GGB6566_SGB9275   | -0.307024383 | 0.33169446  | 0.660447962 |
| s__Bifidobacterium_longum            | s__GGB6566_SGB9275   | 0.053755672  | 0.868219023 | 0.935005102 |
| s__Bifidobacterium_pseudocatenulatum | s__GGB6566_SGB9275   | 0.448710907  | 0.143423366 | 0.634082249 |
| s__Bifidobacterium_catenuatum        | s__GGB6612_SGB9346   | -0.243492377 | 0.445692547 | 0.724609819 |
| s__Bifidobacterium_bifidum           | s__GGB6612_SGB9346   | -0.20785649  | 0.516822372 | 0.734984411 |
| s__Bifidobacterium_adolescentis      | s__GGB6612_SGB9346   | -0.131013944 | 0.684848714 | 0.828923516 |
| s__Bifidobacterium_longum            | s__GGB6612_SGB9346   | 0.131013944  | 0.684848714 | 0.828923516 |
| s__Bifidobacterium_pseudocatenulatum | s__GGB6612_SGB9346   | 0.400098802  | 0.197496288 | 0.645261321 |
| s__Bifidobacterium_longum            | s__GGB9574_SGB14987  | -0.393041832 | 0.206255757 | 0.645261321 |
| s__Bifidobacterium_pseudocatenulatum | s__GGB9574_SGB14987  | -0.35564338  | 0.256568192 | 0.645261321 |
| s__Bifidobacterium_bifidum           | s__GGB9574_SGB14987  | -0.20785649  | 0.516822372 | 0.734984411 |
| s__Bifidobacterium_adolescentis      | s__GGB9574_SGB14987  | 0.393041832  | 0.206255757 | 0.645261321 |
| s__Bifidobacterium_catenuatum        | s__GGB9574_SGB14987  | 0.535683229  | 0.07264704  | 0.564498291 |
| s__Bifidobacterium_longum            | s__GGB9581_SGB14999  | -0.524217897 | 0.080194598 | 0.564498291 |
| s__Bifidobacterium_bifidum           | s__GGB9581_SGB14999  | -0.475247525 | 0.118420573 | 0.596315484 |
| s__Bifidobacterium_pseudocatenulatum | s__GGB9581_SGB14999  | -0.345165502 | 0.271836771 | 0.660447962 |
| s__Bifidobacterium_catenuatum        | s__GGB9581_SGB14999  | 0.129902775  | 0.687401771 | 0.830418246 |
| s__Bifidobacterium_adolescentis      | s__GGB9581_SGB14999  | 0.41188549   | 0.183384009 | 0.645261321 |
| s__Bifidobacterium_longum            | s__GGB9581_SGB79823  | -0.381665274 | 0.220867467 | 0.645261321 |
| s__Bifidobacterium_catenuatum        | s__GGB9581_SGB79823  | -0.359662076 | 0.250847879 | 0.645261321 |
| s__Bifidobacterium_bifidum           | s__GGB9581_SGB79823  | -0.307024383 | 0.33169446  | 0.660447962 |
| s__Bifidobacterium_adolescentis      | s__GGB9581_SGB79823  | -0.215022689 | 0.502135449 | 0.734984411 |
| s__Bifidobacterium_pseudocatenulatum | s__GGB9581_SGB79823  | 0.437766738  | 0.154651873 | 0.634727557 |
| s__Bifidobacterium_pseudocatenulatum | s__GGB9615_SGB15053  | -0.525320086 | 0.079446787 | 0.564498291 |
| s__Bifidobacterium_longum            | s__GGB9615_SGB15053  | -0.473049917 | 0.120373421 | 0.596315484 |
| s__Bifidobacterium_bifidum           | s__GGB9615_SGB15053  | -0.307024383 | 0.33169446  | 0.660447962 |
| s__Bifidobacterium_catenuatum        | s__GGB9615_SGB15053  | -0.047954944 | 0.882346992 | 0.941362816 |
| s__Bifidobacterium_adolescentis      | s__GGB9615_SGB15053  | 0.381665274  | 0.220867467 | 0.645261321 |
| s__Bifidobacterium_adolescentis      | s__GGB9619_SGB15067  | -0.587342165 | 0.044641193 | 0.564498291 |
| s__Bifidobacterium_catenuatum        | s__GGB9619_SGB15067  | -0.218317738 | 0.495445369 | 0.734984411 |
| s__Bifidobacterium_pseudocatenulatum | s__GGB9619_SGB15067  | -0.059050642 | 0.855353581 | 0.928290708 |
| s__Bifidobacterium_bifidum           | s__GGB9619_SGB15067  | -0.0258842   | 0.936357471 | 0.957638323 |
| s__Bifidobacterium_longum            | s__GGB9619_SGB15067  | 0.10151593   | 0.753576707 | 0.872601628 |
| s__Bifidobacterium_longum            | s__GGB9621_SGB15073  | -0.532181156 | 0.074898427 | 0.564498291 |
| s__Bifidobacterium_bifidum           | s__GGB9621_SGB15073  | -0.307024383 | 0.33169446  | 0.660447962 |
| s__Bifidobacterium_pseudocatenulatum | s__GGB9621_SGB15073  | -0.19425899  | 0.545192149 | 0.759052052 |
| s__Bifidobacterium_catenuatum        | s__GGB9621_SGB15073  | -0.047954944 | 0.882346992 | 0.941362816 |
| s__Bifidobacterium_adolescentis      | s__GGB9621_SGB15073  | -0.032253403 | 0.920736382 | 0.952796005 |
| s__Bifidobacterium_adolescentis      | s__GGB9623_SGB15076  | -0.295656198 | 0.350811021 | 0.669943949 |
| s__Bifidobacterium_catenuatum        | s__GGB9623_SGB15076  | -0.02997184  | 0.926329449 | 0.952796005 |
| s__Bifidobacterium_pseudocatenulatum | s__GGB9623_SGB15076  | 0.24624379   | 0.440405169 | 0.724609819 |
| s__Bifidobacterium_longum            | s__GGB9623_SGB15076  | 0.381665274  | 0.220867467 | 0.645261321 |
| s__Bifidobacterium_bifidum           | s__GGB9623_SGB15076  | 0.524499988  | 0.080002751 | 0.564498291 |
| s__Bifidobacterium_adolescentis      | s__GGB9632_SGB15089  | -0.276192475 | 0.384862601 | 0.706464564 |
| s__Bifidobacterium_pseudocatenulatum | s__GGB9632_SGB15089  | -0.131077362 | 0.684703094 | 0.828923516 |
| s__Bifidobacterium_catenuatum        | s__GGB9632_SGB15089  | 0.166478906  | 0.605072824 | 0.804210716 |
| s__Bifidobacterium_longum            | s__GGB9632_SGB15089  | 0.615834573  | 0.033005195 | 0.564498291 |
| s__Bifidobacterium_bifidum           | s__GGB9632_SGB15089  | 0.652837043  | 0.021363058 | 0.527898179 |
| s__Bifidobacterium_longum            | s__GGB9633_SGB15090  | -0.650443636 | 0.022008557 | 0.527898179 |
| s__Bifidobacterium_pseudocatenulatum | s__GGB9633_SGB15090  | -0.525320086 | 0.079446787 | 0.564498291 |
| s__Bifidobacterium_bifidum           | s__GGB9633_SGB15090  | -0.307024383 | 0.33169446  | 0.660447962 |
| s__Bifidobacterium_adolescentis      | s__GGB9633_SGB15090  | 0.440796513  | 0.151489057 | 0.634727557 |

|                                      |                                         |              |             |             |
|--------------------------------------|-----------------------------------------|--------------|-------------|-------------|
| s__Bifidobacterium_catenuatum        | s__GGB9633_SGB15090                     | 0.479549435  | 0.114658408 | 0.596315484 |
| s__Bifidobacterium_catenuatum        | s__GGB9633_SGB15091                     | -0.255166165 | 0.423469413 | 0.724609819 |
| s__Bifidobacterium_pseudocatenulatum | s__GGB9633_SGB15091                     | -0.114349307 | 0.723442264 | 0.855903523 |
| s__Bifidobacterium_adolescentis      | s__GGB9633_SGB15091                     | 0.104011487  | 0.747690649 | 0.870574996 |
| s__Bifidobacterium_bifidum           | s__GGB9633_SGB15091                     | 0.277227723  | 0.383010078 | 0.706464564 |
| s__Bifidobacterium_longum            | s__GGB9633_SGB15091                     | 0.295392624  | 0.351261058 | 0.669943949 |
| s__Bifidobacterium_longum            | s__GGB9634_SGB15093                     | -0.360163005 | 0.250140132 | 0.645261321 |
| s__Bifidobacterium_bifidum           | s__GGB9634_SGB15093                     | -0.307024383 | 0.33169446  | 0.660447962 |
| s__Bifidobacterium_adolescentis      | s__GGB9634_SGB15093                     | -0.166642584 | 0.604712895 | 0.804210716 |
| s__Bifidobacterium_catenuatum        | s__GGB9634_SGB15093                     | -0.095909887 | 0.766842774 | 0.87977919  |
| s__Bifidobacterium_pseudocatenulatum | s__GGB9634_SGB15093                     | -0.062928969 | 0.845950527 | 0.924047848 |
| s__Bifidobacterium_adolescentis      | s__GGB9635_SGB15106                     | -0.218356573 | 0.495366676 | 0.734984411 |
| s__Bifidobacterium_pseudocatenulatum | s__GGB9635_SGB15106                     | -0.133366267 | 0.679453948 | 0.828923516 |
| s__Bifidobacterium_catenuatum        | s__GGB9635_SGB15106                     | 0.340889327  | 0.278214762 | 0.660447962 |
| s__Bifidobacterium_bifidum           | s__GGB9635_SGB15106                     | 0.363748857  | 0.24510805  | 0.645261321 |
| s__Bifidobacterium_longum            | s__GGB9635_SGB15106                     | 0.480384461  | 0.113937412 | 0.596315484 |
| s__Bifidobacterium_adolescentis      | s__GGB9644_SGB15121                     | -0.428527328 | 0.164555525 | 0.645261321 |
| s__Bifidobacterium_pseudocatenulatum | s__GGB9644_SGB15121                     | 0.09317351   | 0.773339261 | 0.882375181 |
| s__Bifidobacterium_catenuatum        | s__GGB9644_SGB15121                     | 0.352593246  | 0.260960143 | 0.654999562 |
| s__Bifidobacterium_longum            | s__GGB9644_SGB15121                     | 0.782166386  | 0.002644434 | 0.185110405 |
| s__Bifidobacterium_bifidum           | s__GGB9644_SGB15121                     | 0.900990099  | 6.33281E-05 | 0.011399055 |
| s__Bifidobacterium_adolescentis      | s__GGB9694_SGB15203                     | -0.480384461 | 0.113937412 | 0.596315484 |
| s__Bifidobacterium_catenuatum        | s__GGB9694_SGB15203                     | -0.243492377 | 0.445692547 | 0.724609819 |
| s__Bifidobacterium_pseudocatenulatum | s__GGB9694_SGB15203                     | 0.044455422  | 0.890885751 | 0.941362816 |
| s__Bifidobacterium_longum            | s__GGB9694_SGB15203                     | 0.218356573  | 0.495366676 | 0.734984411 |
| s__Bifidobacterium_bifidum           | s__GGB9694_SGB15203                     | 0.259820612  | 0.414763969 | 0.724609819 |
| s__Bifidobacterium_longum            | s__GGB9730_SGB15291                     | -0.477305324 | 0.11661097  | 0.596315484 |
| s__Bifidobacterium_bifidum           | s__GGB9730_SGB15291                     | -0.393190275 | 0.206069105 | 0.645261321 |
| s__Bifidobacterium_pseudocatenulatum | s__GGB9730_SGB15291                     | -0.196218841 | 0.541063482 | 0.757497936 |
| s__Bifidobacterium_catenuatum        | s__GGB9730_SGB15291                     | 0.23541811   | 0.461382434 | 0.734984411 |
| s__Bifidobacterium_adolescentis      | s__GGB9730_SGB15291                     | 0.284547405  | 0.370043663 | 0.694865894 |
| s__Bifidobacterium_pseudocatenulatum | s__GGB9758_SGB15368                     | -0.413354494 | 0.18167044  | 0.645261321 |
| s__Bifidobacterium_adolescentis      | s__GGB9758_SGB15368                     | -0.087013654 | 0.788011889 | 0.889690842 |
| s__Bifidobacterium_longum            | s__GGB9758_SGB15368                     | 0.485826235  | 0.109312092 | 0.596315484 |
| s__Bifidobacterium_catenuatum        | s__GGB9758_SGB15368                     | 0.557923109  | 0.059425565 | 0.564498291 |
| s__Bifidobacterium_bifidum           | s__GGB9758_SGB15368                     | 0.716129534  | 0.008801115 | 0.482148042 |
| s__Bifidobacterium_adolescentis      | s__Gordonibacter_pamelaeeae             | -0.457650545 | 0.134651695 | 0.603776285 |
| s__Bifidobacterium_catenuatum        | s__Gordonibacter_pamelaeeae             | -0.25052678  | 0.432235178 | 0.724609819 |
| s__Bifidobacterium_bifidum           | s__Gordonibacter_pamelaeeae             | -0.175742574 | 0.584830936 | 0.794059246 |
| s__Bifidobacterium_longum            | s__Gordonibacter_pamelaeeae             | 0.170578839  | 0.596081538 | 0.798153812 |
| s__Bifidobacterium_pseudocatenulatum | s__Gordonibacter_pamelaeeae             | 0.54633558   | 0.066085334 | 0.564498291 |
| s__Bifidobacterium_longum            | s__Haemophilus_parainfluenzae           | -0.305699203 | 0.333893136 | 0.660447962 |
| s__Bifidobacterium_catenuatum        | s__Haemophilus_parainfluenzae           | -0.243492377 | 0.445692547 | 0.724609819 |
| s__Bifidobacterium_bifidum           | s__Haemophilus_parainfluenzae           | -0.20785649  | 0.516822372 | 0.734984411 |
| s__Bifidobacterium_adolescentis      | s__Haemophilus_parainfluenzae           | 0.043671315  | 0.892800448 | 0.941362816 |
| s__Bifidobacterium_pseudocatenulatum | s__Haemophilus_parainfluenzae           | 0.489009647  | 0.106664928 | 0.596315484 |
| s__Bifidobacterium_longum            | s__Hafnia_alvei                         | -0.392416408 | 0.207043295 | 0.645261321 |
| s__Bifidobacterium_catenuatum        | s__Hafnia_alvei                         | -0.359662076 | 0.250847879 | 0.645261321 |
| s__Bifidobacterium_bifidum           | s__Hafnia_alvei                         | -0.307024383 | 0.33169446  | 0.660447962 |
| s__Bifidobacterium_adolescentis      | s__Hafnia_alvei                         | -0.172018152 | 0.59293728  | 0.795634689 |
| s__Bifidobacterium_pseudocatenulatum | s__Hafnia_alvei                         | 0.481543412  | 0.1129417   | 0.596315484 |
| s__Bifidobacterium_catenuatum        | s__Holdemania_filiformis                | -0.243492377 | 0.445692547 | 0.724609819 |
| s__Bifidobacterium_bifidum           | s__Holdemania_filiformis                | -0.20785649  | 0.516822372 | 0.734984411 |
| s__Bifidobacterium_adolescentis      | s__Holdemania_filiformis                | -0.131013944 | 0.684848714 | 0.828923516 |
| s__Bifidobacterium_longum            | s__Holdemania_filiformis                | 0.131013944  | 0.684848714 | 0.828923516 |
| s__Bifidobacterium_pseudocatenulatum | s__Holdemania_filiformis                | 0.400098802  | 0.197496288 | 0.645261321 |
| s__Bifidobacterium_adolescentis      | s__Hungatella_hathewayi                 | -0.17935393  | 0.577012393 | 0.789138193 |
| s__Bifidobacterium_catenuatum        | s__Hungatella_hathewayi                 | 0.252173913  | 0.42911299  | 0.724609819 |
| s__Bifidobacterium_pseudocatenulatum | s__Hungatella_hathewayi                 | 0.257985263  | 0.418186036 | 0.724609819 |
| s__Bifidobacterium_longum            | s__Hungatella_hathewayi                 | 0.421091835  | 0.172809961 | 0.645261321 |
| s__Bifidobacterium_bifidum           | s__Hungatella_hathewayi                 | 0.422184019  | 0.171581528 | 0.645261321 |
| s__Bifidobacterium_pseudocatenulatum | s__Intestinibacillus_massiliensis       | -0.073873137 | 0.819519161 | 0.901828946 |
| s__Bifidobacterium_catenuatum        | s__Intestinibacillus_massiliensis       | -0.02997184  | 0.926329449 | 0.952796005 |
| s__Bifidobacterium_bifidum           | s__Intestinibacillus_massiliensis       | 0.150314021  | 0.641006322 | 0.828923516 |
| s__Bifidobacterium_longum            | s__Intestinibacillus_massiliensis       | 0.241900526  | 0.448765409 | 0.727301627 |
| s__Bifidobacterium_adolescentis      | s__Intestinibacillus_massiliensis       | 0.473049917  | 0.120373421 | 0.596315484 |
| s__Bifidobacterium_longum            | s__Intestinibacillus_sp_Marseille_P6563 | -0.392416408 | 0.207043295 | 0.645261321 |
| s__Bifidobacterium_catenuatum        | s__Intestinibacillus_sp_Marseille_P6563 | -0.359662076 | 0.250847879 | 0.645261321 |
| s__Bifidobacterium_bifidum           | s__Intestinibacillus_sp_Marseille_P6563 | -0.307024383 | 0.33169446  | 0.660447962 |
| s__Bifidobacterium_adolescentis      | s__Intestinibacillus_sp_Marseille_P6563 | -0.172018152 | 0.59293728  | 0.795634689 |

|                                      |                                            |              |             |             |
|--------------------------------------|--------------------------------------------|--------------|-------------|-------------|
| s__Bifidobacterium_pseudocatenulatum | s__Intestinibacillus_sp_Marseille_P6563    | 0.481543412  | 0.1129417   | 0.596315484 |
| s__Bifidobacterium_adolescentis      | s__Intestinimonas_butyriciproducens        | -0.370914139 | 0.235233133 | 0.645261321 |
| s__Bifidobacterium_catenulatum       | s__Intestinimonas_butyriciproducens        | -0.359662076 | 0.250847879 | 0.645261321 |
| s__Bifidobacterium_bifidum           | s__Intestinimonas_butyriciproducens        | -0.307024383 | 0.33169446  | 0.660447962 |
| s__Bifidobacterium_longum            | s__Intestinimonas_butyriciproducens        | 0.075257941  | 0.816186409 | 0.900520907 |
| s__Bifidobacterium_pseudocatenulatum | s__Intestinimonas_butyriciproducens        | 0.470599244  | 0.122575961 | 0.596315484 |
| s__Bifidobacterium_catenulatum       | s__Intestinimonas_gabonensis               | -0.243492377 | 0.445692547 | 0.724609819 |
| s__Bifidobacterium_bifidum           | s__Intestinimonas_gabonensis               | -0.20785649  | 0.516822372 | 0.734984411 |
| s__Bifidobacterium_adolescentis      | s__Intestinimonas_gabonensis               | -0.131013944 | 0.684848714 | 0.828923516 |
| s__Bifidobacterium_longum            | s__Intestinimonas_gabonensis               | 0.131013944  | 0.684848714 | 0.828923516 |
| s__Bifidobacterium_pseudocatenulatum | s__Intestinimonas_gabonensis               | 0.400098802  | 0.197496288 | 0.645261321 |
| s__Bifidobacterium_adolescentis      | s__Intestinimonas_massiliensis             | -0.321263199 | 0.308570238 | 0.660447962 |
| s__Bifidobacterium_pseudocatenulatum | s__Intestinimonas_massiliensis             | 0.186875086  | 0.560863962 | 0.775640544 |
| s__Bifidobacterium_catenulatum       | s__Intestinimonas_massiliensis             | 0.2047114    | 0.523326534 | 0.740057032 |
| s__Bifidobacterium_longum            | s__Intestinimonas_massiliensis             | 0.614989552  | 0.033314998 | 0.564498291 |
| s__Bifidobacterium_bifidum           | s__Intestinimonas_massiliensis             | 0.699004933  | 0.011423899 | 0.527898179 |
| s__Bifidobacterium_bifidum           | s__Lachnospira_eligens                     | -0.393190275 | 0.206069105 | 0.645261321 |
| s__Bifidobacterium_longum            | s__Lachnospira_eligens                     | -0.330442147 | 0.294152738 | 0.660447962 |
| s__Bifidobacterium_pseudocatenulatum | s__Lachnospira_eligens                     | -0.275640752 | 0.385851757 | 0.706464564 |
| s__Bifidobacterium_catenulatum       | s__Lachnospira_eligens                     | -0.21494697  | 0.502289655 | 0.734984411 |
| s__Bifidobacterium_adolescentis      | s__Lachnospira_eligens                     | 0.293726353  | 0.35411323  | 0.669943949 |
| s__Bifidobacterium_longum            | s__Lachnospiraceae_bacterium               | -0.323951695 | 0.304307435 | 0.660447962 |
| s__Bifidobacterium_pseudocatenulatum | s__Lachnospiraceae_bacterium               | -0.311845985 | 0.323761332 | 0.660447962 |
| s__Bifidobacterium_bifidum           | s__Lachnospiraceae_bacterium               | -0.159214771 | 0.621126986 | 0.820356397 |
| s__Bifidobacterium_adolescentis      | s__Lachnospiraceae_bacterium               | -0.056339425 | 0.861937304 | 0.932224037 |
| s__Bifidobacterium_catenulatum       | s__Lachnospiraceae_bacterium               | 0.125649715  | 0.697201253 | 0.837439065 |
| s__Bifidobacterium_longum            | s__Lachnospiraceae_bacterium_NSJ_29        | -0.257010559 | 0.420009062 | 0.724609819 |
| s__Bifidobacterium_bifidum           | s__Lachnospiraceae_bacterium_NSJ_29        | 0.032765856  | 0.91948059  | 0.952796005 |
| s__Bifidobacterium_pseudocatenulatum | s__Lachnospiraceae_bacterium_NSJ_29        | 0.191546963  | 0.550926934 | 0.765345024 |
| s__Bifidobacterium_adolescentis      | s__Lachnospiraceae_bacterium_NSJ_29        | 0.394694787  | 0.204183151 | 0.645261321 |
| s__Bifidobacterium_catenulatum       | s__Lachnospiraceae_bacterium_NSJ_29        | 0.419658371  | 0.174430606 | 0.645261321 |
| s__Bifidobacterium_catenulatum       | s__Lacrimispora_amygdalina                 | -0.81878968  | 0.001125347 | 0.116865569 |
| s__Bifidobacterium_bifidum           | s__Lacrimispora_amygdalina                 | -0.565822492 | 0.05516271  | 0.564498291 |
| s__Bifidobacterium_longum            | s__Lacrimispora_amygdalina                 | -0.286713287 | 0.366408456 | 0.690096644 |
| s__Bifidobacterium_adolescentis      | s__Lacrimispora_amygdalina                 | -0.272727273 | 0.391232746 | 0.708266178 |
| s__Bifidobacterium_pseudocatenulatum | s__Lacrimispora_amygdalina                 | 0.373724648  | 0.231425448 | 0.645261321 |
| s__Bifidobacterium_adolescentis      | s__Lacrimispora_saccharolytica             | -0.381665274 | 0.220867467 | 0.645261321 |
| s__Bifidobacterium_pseudocatenulatum | s__Lacrimispora_saccharolytica             | -0.016416253 | 0.959615141 | 0.973217602 |
| s__Bifidobacterium_catenulatum       | s__Lacrimispora_saccharolytica             | 0.107898623  | 0.738547085 | 0.864841382 |
| s__Bifidobacterium_bifidum           | s__Lacrimispora_saccharolytica             | 0.150314021  | 0.641006322 | 0.828923516 |
| s__Bifidobacterium_longum            | s__Lacrimispora_saccharolytica             | 0.236524958  | 0.459216424 | 0.734984411 |
| s__Bifidobacterium_longum            | s__Lacticaeibacillus_paracasei             | -0.639692501 | 0.025084403 | 0.527898179 |
| s__Bifidobacterium_pseudocatenulatum | s__Lacticaeibacillus_paracasei             | -0.525320086 | 0.079446787 | 0.564498291 |
| s__Bifidobacterium_bifidum           | s__Lacticaeibacillus_paracasei             | -0.307024383 | 0.33169446  | 0.660447962 |
| s__Bifidobacterium_adolescentis      | s__Lacticaeibacillus_paracasei             | 0.462298782  | 0.130231626 | 0.598875359 |
| s__Bifidobacterium_catenulatum       | s__Lacticaeibacillus_paracasei             | 0.527504379  | 0.077978868 | 0.564498291 |
| s__Bifidobacterium_longum            | s__Lentisphaeria_bacterium                 | -0.305699203 | 0.333893136 | 0.660447962 |
| s__Bifidobacterium_catenulatum       | s__Lentisphaeria_bacterium                 | -0.243492377 | 0.445692547 | 0.724609819 |
| s__Bifidobacterium_bifidum           | s__Lentisphaeria_bacterium                 | -0.20785649  | 0.516822372 | 0.734984411 |
| s__Bifidobacterium_adolescentis      | s__Lentisphaeria_bacterium                 | 0.043671315  | 0.892800448 | 0.941362816 |
| s__Bifidobacterium_pseudocatenulatum | s__Lentisphaeria_bacterium                 | 0.489009647  | 0.106664928 | 0.596315484 |
| s__Bifidobacterium_pseudocatenulatum | s__Lentisphaeria_unclassified_SGB9198      | -0.35564338  | 0.256568192 | 0.645261321 |
| s__Bifidobacterium_catenulatum       | s__Lentisphaeria_unclassified_SGB9198      | -0.243492377 | 0.445692547 | 0.724609819 |
| s__Bifidobacterium_bifidum           | s__Lentisphaeria_unclassified_SGB9198      | -0.20785649  | 0.516822372 | 0.734984411 |
| s__Bifidobacterium_longum            | s__Lentisphaeria_unclassified_SGB9198      | -0.131013944 | 0.684848714 | 0.828923516 |
| s__Bifidobacterium_adolescentis      | s__Lentisphaeria_unclassified_SGB9198      | 0.305699203  | 0.333893136 | 0.660447962 |
| s__Bifidobacterium_longum            | s__Mediterraneibacter_butyrificigenes      | -0.392416408 | 0.207043295 | 0.645261321 |
| s__Bifidobacterium_catenulatum       | s__Mediterraneibacter_butyrificigenes      | -0.359662076 | 0.250847879 | 0.645261321 |
| s__Bifidobacterium_bifidum           | s__Mediterraneibacter_butyrificigenes      | -0.307024383 | 0.33169446  | 0.660447962 |
| s__Bifidobacterium_adolescentis      | s__Mediterraneibacter_butyrificigenes      | -0.172018152 | 0.59293728  | 0.795634689 |
| s__Bifidobacterium_pseudocatenulatum | s__Mediterraneibacter_butyrificigenes      | 0.481543412  | 0.1129417   | 0.596315484 |
| s__Bifidobacterium_catenulatum       | s__Mediterraneibacter_glycyrrhizinilyticus | -0.243492377 | 0.445692547 | 0.724609819 |
| s__Bifidobacterium_bifidum           | s__Mediterraneibacter_glycyrrhizinilyticus | -0.20785649  | 0.516822372 | 0.734984411 |
| s__Bifidobacterium_adolescentis      | s__Mediterraneibacter_glycyrrhizinilyticus | -0.131013944 | 0.684848714 | 0.828923516 |
| s__Bifidobacterium_longum            | s__Mediterraneibacter_glycyrrhizinilyticus | 0.131013944  | 0.684848714 | 0.828923516 |
| s__Bifidobacterium_pseudocatenulatum | s__Mediterraneibacter_glycyrrhizinilyticus | 0.400098802  | 0.197496288 | 0.645261321 |
| s__Bifidobacterium_catenulatum       | s__Mediterraneibacter_sp_gm002             | -0.243492377 | 0.445692547 | 0.724609819 |
| s__Bifidobacterium_bifidum           | s__Mediterraneibacter_sp_gm002             | -0.20785649  | 0.516822372 | 0.734984411 |
| s__Bifidobacterium_adolescentis      | s__Mediterraneibacter_sp_gm002             | -0.131013944 | 0.684848714 | 0.828923516 |
| s__Bifidobacterium_longum            | s__Mediterraneibacter_sp_gm002             | 0.131013944  | 0.684848714 | 0.828923516 |

|                                      |                                     |              |             |             |
|--------------------------------------|-------------------------------------|--------------|-------------|-------------|
| s__Bifidobacterium_pseudocatenulatum | s__Mediterraneibacter_sp_gm002      | 0.400098802  | 0.197496288 | 0.645261321 |
| s__Bifidobacterium_longum            | s__Merdimonas_faecis                | -0.393041832 | 0.206255757 | 0.645261321 |
| s__Bifidobacterium_pseudocatenulatum | s__Merdimonas_faecis                | -0.35564338  | 0.256568192 | 0.645261321 |
| s__Bifidobacterium_bifidum           | s__Merdimonas_faecis                | -0.20785649  | 0.516822372 | 0.734984411 |
| s__Bifidobacterium_adolescentis      | s__Merdimonas_faecis                | 0.393041832  | 0.206255757 | 0.645261321 |
| s__Bifidobacterium_catenuatum        | s__Merdimonas_faecis                | 0.535683229  | 0.07264704  | 0.564498291 |
| s__Bifidobacterium_adolescentis      | s__Methanobrevibacter_smithii       | -0.499927753 | 0.097910881 | 0.596315484 |
| s__Bifidobacterium_pseudocatenulatum | s__Methanobrevibacter_smithii       | -0.076609179 | 0.812937132 | 0.900520907 |
| s__Bifidobacterium_catenuatum        | s__Methanobrevibacter_smithii       | 0.107898623  | 0.738547085 | 0.864841382 |
| s__Bifidobacterium_bifidum           | s__Methanobrevibacter_smithii       | 0.466932916  | 0.125920123 | 0.598714546 |
| s__Bifidobacterium_longum            | s__Methanobrevibacter_smithii       | 0.532181156  | 0.074898427 | 0.564498291 |
| s__Bifidobacterium_catenuatum        | s__Neobittarella_massiliensis       | -0.243492377 | 0.445692547 | 0.724609819 |
| s__Bifidobacterium_bifidum           | s__Neobittarella_massiliensis       | -0.20785649  | 0.516822372 | 0.734984411 |
| s__Bifidobacterium_adolescentis      | s__Neobittarella_massiliensis       | -0.131013944 | 0.684848714 | 0.828923516 |
| s__Bifidobacterium_longum            | s__Neobittarella_massiliensis       | 0.131013944  | 0.684848714 | 0.828923516 |
| s__Bifidobacterium_pseudocatenulatum | s__Neobittarella_massiliensis       | 0.400098802  | 0.197496288 | 0.645261321 |
| s__Bifidobacterium_longum            | s__Odoribacter_splanchnicus         | -0.64790339  | 0.022709071 | 0.527898179 |
| s__Bifidobacterium_bifidum           | s__Odoribacter_splanchnicus         | -0.423176103 | 0.17047045  | 0.645261321 |
| s__Bifidobacterium_pseudocatenulatum | s__Odoribacter_splanchnicus         | -0.01075331  | 0.973540856 | 0.980731707 |
| s__Bifidobacterium_adolescentis      | s__Odoribacter_splanchnicus         | 0            | 1           | 1           |
| s__Bifidobacterium_catenuatum        | s__Odoribacter_splanchnicus         | 0.023559321  | 0.942064868 | 0.961549197 |
| s__Bifidobacterium_adolescentis      | s__Oscillibacter_sp_ER4             | -0.640670825 | 0.024792334 | 0.527898179 |
| s__Bifidobacterium_catenuatum        | s__Oscillibacter_sp_ER4             | -0.178605182 | 0.578630016 | 0.789895797 |
| s__Bifidobacterium_pseudocatenulatum | s__Oscillibacter_sp_ER4             | 0.217391304  | 0.497322293 | 0.734984411 |
| s__Bifidobacterium_bifidum           | s__Oscillibacter_sp_ER4             | 0.302813907  | 0.338707502 | 0.663719211 |
| s__Bifidobacterium_longum            | s__Oscillibacter_sp_ER4             | 0.466265989  | 0.126534788 | 0.598875359 |
| s__Bifidobacterium_adolescentis      | s__Oscillibacter_sp_NSJ_62          | -0.218356573 | 0.49536676  | 0.734984411 |
| s__Bifidobacterium_pseudocatenulatum | s__Oscillibacter_sp_NSJ_62          | -0.133366267 | 0.679453948 | 0.828923516 |
| s__Bifidobacterium_catenuatum        | s__Oscillibacter_sp_NSJ_62          | 0.340889327  | 0.278214762 | 0.660447962 |
| s__Bifidobacterium_bifidum           | s__Oscillibacter_sp_NSJ_62          | 0.363748857  | 0.24510805  | 0.645261321 |
| s__Bifidobacterium_longum            | s__Oscillibacter_sp_NSJ_62          | 0.480384461  | 0.113937412 | 0.596315484 |
| s__Bifidobacterium_longum            | s__Parabacteroides_acidifaciens     | -0.381665274 | 0.220867467 | 0.645261321 |
| s__Bifidobacterium_catenuatum        | s__Parabacteroides_acidifaciens     | -0.359662076 | 0.250847879 | 0.645261321 |
| s__Bifidobacterium_bifidum           | s__Parabacteroides_acidifaciens     | -0.307024383 | 0.33169446  | 0.660447962 |
| s__Bifidobacterium_adolescentis      | s__Parabacteroides_acidifaciens     | -0.215022689 | 0.502135449 | 0.734984411 |
| s__Bifidobacterium_pseudocatenulatum | s__Parabacteroides_acidifaciens     | 0.437766738  | 0.154651873 | 0.634727557 |
| s__Bifidobacterium_catenuatum        | s__Parabacteroides_distasonis       | -0.327515872 | 0.29870715  | 0.660447962 |
| s__Bifidobacterium_bifidum           | s__Parabacteroides_distasonis       | -0.16225792  | 0.614382472 | 0.812300016 |
| s__Bifidobacterium_pseudocatenulatum | s__Parabacteroides_distasonis       | -0.010677847 | 0.97372648  | 0.980731707 |
| s__Bifidobacterium_longum            | s__Parabacteroides_distasonis       | 0.181818182  | 0.572958221 | 0.784703651 |
| s__Bifidobacterium_adolescentis      | s__Parabacteroides_distasonis       | 0.195804196  | 0.542873521 | 0.757497936 |
| s__Bifidobacterium_catenuatum        | s__Parabacteroides_johnsonii        | -0.52024658  | 0.082928797 | 0.564812347 |
| s__Bifidobacterium_pseudocatenulatum | s__Parabacteroides_johnsonii        | -0.094983596 | 0.769040379 | 0.880100706 |
| s__Bifidobacterium_bifidum           | s__Parabacteroides_johnsonii        | -0.062174957 | 0.847777232 | 0.924047848 |
| s__Bifidobacterium_adolescentis      | s__Parabacteroides_johnsonii        | 0.156757891  | 0.626591784 | 0.822712109 |
| s__Bifidobacterium_longum            | s__Parabacteroides_johnsonii        | 0.235136837  | 0.461933626 | 0.734984411 |
| s__Bifidobacterium_adolescentis      | s__Parabacteroides_merdae           | -0.177964118 | 0.580016415 | 0.790334075 |
| s__Bifidobacterium_longum            | s__Parabacteroides_merdae           | -0.110337753 | 0.732825367 | 0.861959166 |
| s__Bifidobacterium_pseudocatenulatum | s__Parabacteroides_merdae           | -0.09057971  | 0.77950961  | 0.884848747 |
| s__Bifidobacterium_bifidum           | s__Parabacteroides_merdae           | -0.033881276 | 0.916747785 | 0.952796005 |
| s__Bifidobacterium_catenuatum        | s__Parabacteroides_merdae           | 0.365148372  | 0.243160407 | 0.645261321 |
| s__Bifidobacterium_longum            | s__Paraclostridium_bifermentans     | -0.305699203 | 0.333893136 | 0.660447962 |
| s__Bifidobacterium_catenuatum        | s__Paraclostridium_bifermentans     | -0.243492377 | 0.445692547 | 0.724609819 |
| s__Bifidobacterium_bifidum           | s__Paraclostridium_bifermentans     | -0.20785649  | 0.516822372 | 0.734984411 |
| s__Bifidobacterium_adolescentis      | s__Paraclostridium_bifermentans     | 0.043671315  | 0.892800448 | 0.941362816 |
| s__Bifidobacterium_pseudocatenulatum | s__Paraclostridium_bifermentans     | 0.489009647  | 0.106664928 | 0.596315484 |
| s__Bifidobacterium_pseudocatenulatum | s__Paraprevotella_clara             | -0.525320086 | 0.079446787 | 0.564498291 |
| s__Bifidobacterium_catenuatum        | s__Paraprevotella_clara             | -0.359662076 | 0.250847879 | 0.645261321 |
| s__Bifidobacterium_bifidum           | s__Paraprevotella_clara             | -0.307024383 | 0.33169446  | 0.660447962 |
| s__Bifidobacterium_longum            | s__Paraprevotella_clara             | -0.075257941 | 0.816186409 | 0.900520907 |
| s__Bifidobacterium_adolescentis      | s__Paraprevotella_clara             | 0.569810127  | 0.05309411  | 0.564498291 |
| s__Bifidobacterium_longum            | s__Parasutterella_excrementihominis | -0.381665274 | 0.220867467 | 0.645261321 |
| s__Bifidobacterium_catenuatum        | s__Parasutterella_excrementihominis | -0.359662076 | 0.250847879 | 0.645261321 |
| s__Bifidobacterium_bifidum           | s__Parasutterella_excrementihominis | -0.307024383 | 0.33169446  | 0.660447962 |
| s__Bifidobacterium_adolescentis      | s__Parasutterella_excrementihominis | -0.215022689 | 0.502135449 | 0.734984411 |
| s__Bifidobacterium_pseudocatenulatum | s__Parasutterella_excrementihominis | 0.437766738  | 0.154651873 | 0.634727557 |
| s__Bifidobacterium_longum            | s__Peptococcaceae_bacterium         | -0.381665274 | 0.220867467 | 0.645261321 |
| s__Bifidobacterium_catenuatum        | s__Peptococcaceae_bacterium         | -0.359662076 | 0.250847879 | 0.645261321 |
| s__Bifidobacterium_bifidum           | s__Peptococcaceae_bacterium         | -0.307024383 | 0.33169446  | 0.660447962 |
| s__Bifidobacterium_adolescentis      | s__Peptococcaceae_bacterium         | -0.215022689 | 0.502135449 | 0.734984411 |

|                                      |                                        |              |             |             |
|--------------------------------------|----------------------------------------|--------------|-------------|-------------|
| s__Bifidobacterium_pseudocatenulatum | s__Peptococcaceae_bacterium            | 0.437766738  | 0.154651873 | 0.634727557 |
| s__Bifidobacterium_adolescentis      | s__Peptoniphilus_senegalensis          | -0.305699203 | 0.333893136 | 0.660447962 |
| s__Bifidobacterium_catenulatum       | s__Peptoniphilus_senegalensis          | -0.243492377 | 0.445692547 | 0.724609819 |
| s__Bifidobacterium_longum            | s__Peptoniphilus_senegalensis          | -0.218356573 | 0.495366676 | 0.734984411 |
| s__Bifidobacterium_bifidum           | s__Peptoniphilus_senegalensis          | -0.20785649  | 0.516822372 | 0.734984411 |
| s__Bifidobacterium_pseudocatenulatum | s__Peptoniphilus_senegalensis          | 0.133366267  | 0.679453948 | 0.828923516 |
| s__Bifidobacterium_adolescentis      | s__Phascolarctobacterium_faecium       | -0.276192475 | 0.384862601 | 0.706464564 |
| s__Bifidobacterium_bifidum           | s__Phascolarctobacterium_faecium       | 0.044410683  | 0.890994984 | 0.941362816 |
| s__Bifidobacterium_pseudocatenulatum | s__Phascolarctobacterium_faecium       | 0.079786221  | 0.805308147 | 0.900520907 |
| s__Bifidobacterium_catenulatum       | s__Phascolarctobacterium_faecium       | 0.129021152  | 0.689429551 | 0.832070147 |
| s__Bifidobacterium_longum            | s__Phascolarctobacterium_faecium       | 0.335909767  | 0.285748612 | 0.660447962 |
| s__Bifidobacterium_longum            | s__Phascolarctobacterium_succinatutens | -0.650443636 | 0.022008557 | 0.527898179 |
| s__Bifidobacterium_pseudocatenulatum | s__Phascolarctobacterium_succinatutens | -0.525320086 | 0.079446787 | 0.564498291 |
| s__Bifidobacterium_bifidum           | s__Phascolarctobacterium_succinatutens | -0.307024383 | 0.33169446  | 0.660447962 |
| s__Bifidobacterium_adolescentis      | s__Phascolarctobacterium_succinatutens | 0.440796513  | 0.151489057 | 0.634727557 |
| s__Bifidobacterium_catenulatum       | s__Phascolarctobacterium_succinatutens | 0.479549435  | 0.114658408 | 0.596315484 |
| s__Bifidobacterium_adolescentis      | s__Phocaecicola_coprocola              | -0.370914139 | 0.235233133 | 0.645261321 |
| s__Bifidobacterium_catenulatum       | s__Phocaecicola_coprocola              | -0.359662076 | 0.250847879 | 0.645261321 |
| s__Bifidobacterium_bifidum           | s__Phocaecicola_coprocola              | -0.307024383 | 0.33169446  | 0.660447962 |
| s__Bifidobacterium_longum            | s__Phocaecicola_coprocola              | 0.075257941  | 0.816186409 | 0.900520907 |
| s__Bifidobacterium_pseudocatenulatum | s__Phocaecicola_coprocola              | 0.470599244  | 0.122575961 | 0.596315484 |
| s__Bifidobacterium_adolescentis      | s__Phocaecicola_coprophilus            | -0.370914139 | 0.235233133 | 0.645261321 |
| s__Bifidobacterium_catenulatum       | s__Phocaecicola_coprophilus            | -0.359662076 | 0.250847879 | 0.645261321 |
| s__Bifidobacterium_bifidum           | s__Phocaecicola_coprophilus            | -0.307024383 | 0.33169446  | 0.660447962 |
| s__Bifidobacterium_longum            | s__Phocaecicola_coprophilus            | 0.075257941  | 0.816186409 | 0.900520907 |
| s__Bifidobacterium_pseudocatenulatum | s__Phocaecicola_coprophilus            | 0.470599244  | 0.122575961 | 0.596315484 |
| s__Bifidobacterium_pseudocatenulatum | s__Phocaecicola_dorei                  | -0.619565217 | 0.031662113 | 0.564498291 |
| s__Bifidobacterium_bifidum           | s__Phocaecicola_dorei                  | -0.1778767   | 0.580205571 | 0.790334075 |
| s__Bifidobacterium_catenulatum       | s__Phocaecicola_dorei                  | -0.011907012 | 0.970703126 | 0.980731707 |
| s__Bifidobacterium_longum            | s__Phocaecicola_dorei                  | 0.099659906  | 0.75796219  | 0.875373382 |
| s__Bifidobacterium_adolescentis      | s__Phocaecicola_dorei                  | 0.366606083  | 0.241141519 | 0.645261321 |
| s__Bifidobacterium_longum            | s__Phocaecicola_massiliensis           | -0.584939601 | 0.045739074 | 0.564498291 |
| s__Bifidobacterium_bifidum           | s__Phocaecicola_massiliensis           | -0.573065922 | 0.051445927 | 0.564498291 |
| s__Bifidobacterium_catenulatum       | s__Phocaecicola_massiliensis           | -0.417924113 | 0.176404014 | 0.645261321 |
| s__Bifidobacterium_pseudocatenulatum | s__Phocaecicola_massiliensis           | -0.360117646 | 0.25020417  | 0.645261321 |
| s__Bifidobacterium_adolescentis      | s__Phocaecicola_massiliensis           | 0.539405381  | 0.070305563 | 0.564498291 |
| s__Bifidobacterium_catenulatum       | s__Phocaecicola_plebeius               | -0.359662076 | 0.250847879 | 0.645261321 |
| s__Bifidobacterium_adolescentis      | s__Phocaecicola_plebeius               | -0.3117829   | 0.323864452 | 0.660447962 |
| s__Bifidobacterium_bifidum           | s__Phocaecicola_plebeius               | -0.307024383 | 0.33169446  | 0.660447962 |
| s__Bifidobacterium_longum            | s__Phocaecicola_plebeius               | -0.043004538 | 0.894429051 | 0.941504264 |
| s__Bifidobacterium_pseudocatenulatum | s__Phocaecicola_plebeius               | 0.410406317  | 0.185119563 | 0.645261321 |
| s__Bifidobacterium_pseudocatenulatum | s__Phocaecicola_vulgatus               | -0.615755849 | 0.03303397  | 0.564498291 |
| s__Bifidobacterium_longum            | s__Phocaecicola_vulgatus               | -0.573426573 | 0.055481324 | 0.564498291 |
| s__Bifidobacterium_bifidum           | s__Phocaecicola_vulgatus               | -0.457650545 | 0.134651695 | 0.603776285 |
| s__Bifidobacterium_catenulatum       | s__Phocaecicola_vulgatus               | -0.093575963 | 0.77238294  | 0.882375181 |
| s__Bifidobacterium_adolescentis      | s__Phocaecicola_vulgatus               | 0.531468531  | 0.079302939 | 0.564498291 |
| s__Bifidobacterium_pseudocatenulatum | s__Prevotella_lascolaii                | -0.35564338  | 0.256568192 | 0.645261321 |
| s__Bifidobacterium_catenulatum       | s__Prevotella_lascolaii                | -0.243492377 | 0.445692547 | 0.724609819 |
| s__Bifidobacterium_bifidum           | s__Prevotella_lascolaii                | -0.20785649  | 0.516822372 | 0.734984411 |
| s__Bifidobacterium_longum            | s__Prevotella_lascolaii                | -0.131013944 | 0.684848714 | 0.828923516 |
| s__Bifidobacterium_adolescentis      | s__Prevotella_lascolaii                | 0.305699203  | 0.333893136 | 0.660447962 |
| s__Bifidobacterium_catenulatum       | s__Prevotella_marseillensis            | -0.556726179 | 0.060090882 | 0.564498291 |
| s__Bifidobacterium_bifidum           | s__Prevotella_marseillensis            | -0.475247525 | 0.118420573 | 0.596315484 |
| s__Bifidobacterium_pseudocatenulatum | s__Prevotella_marseillensis            | -0.097408669 | 0.76329029  | 0.879109475 |
| s__Bifidobacterium_longum            | s__Prevotella_marseillensis            | -0.008320919 | 0.979524629 | 0.984718787 |
| s__Bifidobacterium_adolescentis      | s__Prevotella_marseillensis            | 0.220504353  | 0.491028011 | 0.734984411 |
| s__Bifidobacterium_catenulatum       | s__Pseudoflavonifractor_capillosus     | -0.243492377 | 0.445692547 | 0.724609819 |
| s__Bifidobacterium_bifidum           | s__Pseudoflavonifractor_capillosus     | -0.20785649  | 0.516822372 | 0.734984411 |
| s__Bifidobacterium_adolescentis      | s__Pseudoflavonifractor_capillosus     | -0.131013944 | 0.684848714 | 0.828923516 |
| s__Bifidobacterium_longum            | s__Pseudoflavonifractor_capillosus     | 0.131013944  | 0.684848714 | 0.828923516 |
| s__Bifidobacterium_pseudocatenulatum | s__Pseudoflavonifractor_capillosus     | 0.400098802  | 0.197496288 | 0.645261321 |
| s__Bifidobacterium_longum            | s__Raoultella_ornithinolytica          | -0.639692501 | 0.025084403 | 0.527898179 |
| s__Bifidobacterium_pseudocatenulatum | s__Raoultella_ornithinolytica          | -0.525320086 | 0.079446787 | 0.564498291 |
| s__Bifidobacterium_bifidum           | s__Raoultella_ornithinolytica          | -0.307024383 | 0.33169446  | 0.660447962 |
| s__Bifidobacterium_adolescentis      | s__Raoultella_ornithinolytica          | 0.462298782  | 0.130231626 | 0.598875359 |
| s__Bifidobacterium_catenulatum       | s__Raoultella_ornithinolytica          | 0.527504379  | 0.077978868 | 0.564498291 |
| s__Bifidobacterium_adolescentis      | s__Raoultibacter_massiliensis          | 0.131013944  | 0.684848714 | 0.828923516 |
| s__Bifidobacterium_catenulatum       | s__Raoultibacter_massiliensis          | 0.243492377  | 0.445692547 | 0.724609819 |
| s__Bifidobacterium_longum            | s__Raoultibacter_massiliensis          | 0.305699203  | 0.333893136 | 0.660447962 |
| s__Bifidobacterium_pseudocatenulatum | s__Raoultibacter_massiliensis          | 0.311187957  | 0.324837832 | 0.660447962 |



|                                      |                                           |              |             |             |
|--------------------------------------|-------------------------------------------|--------------|-------------|-------------|
| s__Bifidobacterium_bifidum           | s__Raoultibacter_massiliensis             | 0.467677102  | 0.12523656  | 0.598714546 |
| s__Bifidobacterium_pseudocatenulatum | s__Rhodobacteraceae_unclassified_SGB53807 | -0.35564338  | 0.256568192 | 0.645261321 |
| s__Bifidobacterium_catenulatum       | s__Rhodobacteraceae_unclassified_SGB53807 | -0.243492377 | 0.445692547 | 0.724609819 |
| s__Bifidobacterium_bifidum           | s__Rhodobacteraceae_unclassified_SGB53807 | -0.20785649  | 0.516822372 | 0.734984411 |
| s__Bifidobacterium_longum            | s__Rhodobacteraceae_unclassified_SGB53807 | -0.131013944 | 0.684848714 | 0.828923516 |
| s__Bifidobacterium_adolescentis      | s__Rhodobacteraceae_unclassified_SGB53807 | 0.305699203  | 0.333893136 | 0.660447962 |
| s__Bifidobacterium_catenulatum       | s__Roseburia_faecis                       | -0.533665582 | 0.073938377 | 0.564498291 |
| s__Bifidobacterium_pseudocatenulatum | s__Roseburia_faecis                       | -0.328469196 | 0.297219092 | 0.660447962 |
| s__Bifidobacterium_longum            | s__Roseburia_faecis                       | -0.304547789 | 0.335809901 | 0.662524571 |
| s__Bifidobacterium_bifidum           | s__Roseburia_faecis                       | -0.2847262   | 0.369729839 | 0.694865894 |
| s__Bifidobacterium_adolescentis      | s__Roseburia_faecis                       | 0.326301203  | 0.300609187 | 0.660447962 |
| s__Bifidobacterium_pseudocatenulatum | s__Ruminococcaceae_bacterium              | -0.555953382 | 0.060523182 | 0.564498291 |
| s__Bifidobacterium_longum            | s__Ruminococcaceae_bacterium              | -0.348800045 | 0.266482545 | 0.660447962 |
| s__Bifidobacterium_bifidum           | s__Ruminococcaceae_bacterium              | -0.092836593 | 0.774140075 | 0.882375181 |
| s__Bifidobacterium_adolescentis      | s__Ruminococcaceae_bacterium              | 0.293726353  | 0.35411323  | 0.669943949 |
| s__Bifidobacterium_catenulatum       | s__Ruminococcaceae_bacterium              | 0.624369771  | 0.029990815 | 0.564498291 |
| s__Bifidobacterium_adolescentis      | s__Ruminococcaceae_unclassified_SGB15234  | -0.295656198 | 0.350811021 | 0.669943949 |
| s__Bifidobacterium_catenulatum       | s__Ruminococcaceae_unclassified_SGB15234  | -0.02997184  | 0.926329449 | 0.952796005 |
| s__Bifidobacterium_pseudocatenulatum | s__Ruminococcaceae_unclassified_SGB15234  | 0.24624379   | 0.440405169 | 0.724609819 |
| s__Bifidobacterium_longum            | s__Ruminococcaceae_unclassified_SGB15234  | 0.381665274  | 0.220867467 | 0.645261321 |
| s__Bifidobacterium_bifidum           | s__Ruminococcaceae_unclassified_SGB15234  | 0.524499988  | 0.080002751 | 0.564498291 |
| s__Bifidobacterium_pseudocatenulatum | s__Ruminococcus_bicirculans               | -0.525159782 | 0.079555253 | 0.564498291 |
| s__Bifidobacterium_catenulatum       | s__Ruminococcus_bicirculans               | 0.115984621  | 0.719627162 | 0.852991745 |
| s__Bifidobacterium_bifidum           | s__Ruminococcus_bicirculans               | 0.252475248  | 0.428542997 | 0.724609819 |
| s__Bifidobacterium_adolescentis      | s__Ruminococcus_bicirculans               | 0.349478598  | 0.26548974  | 0.660447962 |
| s__Bifidobacterium_longum            | s__Ruminococcus_bicirculans               | 0.378601814  | 0.224905685 | 0.645261321 |
| s__Bifidobacterium_catenulatum       | s__Ruminococcus_bromii                    | -0.52024658  | 0.082928797 | 0.564812347 |
| s__Bifidobacterium_pseudocatenulatum | s__Ruminococcus_bromii                    | -0.117779659 | 0.715446184 | 0.85204366  |
| s__Bifidobacterium_bifidum           | s__Ruminococcus_bromii                    | -0.062174957 | 0.847777232 | 0.924047848 |
| s__Bifidobacterium_longum            | s__Ruminococcus_bromii                    | 0.022393984  | 0.944926637 | 0.963274727 |
| s__Bifidobacterium_adolescentis      | s__Ruminococcus_bromii                    | 0.220207514  | 0.491626634 | 0.734984411 |
| s__Bifidobacterium_pseudocatenulatum | s__Ruminococcus_sp_NSJ_71                 | -0.491278506 | 0.104804504 | 0.596315484 |
| s__Bifidobacterium_longum            | s__Ruminococcus_sp_NSJ_71                 | 0.08320919   | 0.797106041 | 0.896744296 |
| s__Bifidobacterium_adolescentis      | s__Ruminococcus_sp_NSJ_71                 | 0.124813785  | 0.699132377 | 0.838058363 |
| s__Bifidobacterium_bifidum           | s__Ruminococcus_sp_NSJ_71                 | 0.341584158  | 0.277172639 | 0.660447962 |
| s__Bifidobacterium_catenulatum       | s__Ruminococcus_sp_NSJ_71                 | 0.793334804  | 0.002074106 | 0.163335839 |
| s__Bifidobacterium_bifidum           | s__Ruminococcus_torques                   | -0.81315063  | 0.001298506 | 0.116865569 |
| s__Bifidobacterium_longum            | s__Ruminococcus_torques                   | -0.597959437 | 0.040011845 | 0.564498291 |
| s__Bifidobacterium_catenulatum       | s__Ruminococcus_torques                   | -0.460404469 | 0.132021379 | 0.59975911  |
| s__Bifidobacterium_adolescentis      | s__Ruminococcus_torques                   | 0.024914977  | 0.93873652  | 0.959292794 |
| s__Bifidobacterium_pseudocatenulatum | s__Ruminococcus_torques                   | 0.039855072  | 0.902126587 | 0.948022935 |
| s__Bifidobacterium_adolescentis      | s__Ruthenibacterium_lactatiformans        | -0.464072822 | 0.128569905 | 0.598875359 |
| s__Bifidobacterium_catenulatum       | s__Ruthenibacterium_lactatiformans        | -0.008085842 | 0.980102982 | 0.984718787 |
| s__Bifidobacterium_bifidum           | s__Ruthenibacterium_lactatiformans        | 0.3106104    | 0.325784294 | 0.660447962 |
| s__Bifidobacterium_pseudocatenulatum | s__Ruthenibacterium_lactatiformans        | 0.365375847  | 0.242844706 | 0.645261321 |
| s__Bifidobacterium_longum            | s__Ruthenibacterium_lactatiformans        | 0.377059168  | 0.226955833 | 0.645261321 |
| s__Bifidobacterium_adolescentis      | s__Schaalia_turicensis                    | -0.218356573 | 0.49536676  | 0.734984411 |
| s__Bifidobacterium_pseudocatenulatum | s__Schaalia_turicensis                    | -0.133366267 | 0.679453948 | 0.828923516 |
| s__Bifidobacterium_catenulatum       | s__Schaalia_turicensis                    | 0.340889327  | 0.278214762 | 0.660447962 |
| s__Bifidobacterium_bifidum           | s__Schaalia_turicensis                    | 0.363748857  | 0.24510805  | 0.645261321 |
| s__Bifidobacterium_longum            | s__Schaalia_turicensis                    | 0.480384461  | 0.113937412 | 0.596315484 |
| s__Bifidobacterium_bifidum           | s__Senegalimassilia_anaerobia             | -0.639513838 | 0.025138009 | 0.527898179 |
| s__Bifidobacterium_longum            | s__Senegalimassilia_anaerobia             | -0.582243597 | 0.046993588 | 0.564498291 |
| s__Bifidobacterium_catenulatum       | s__Senegalimassilia_anaerobia             | -0.166478906 | 0.605072824 | 0.804210716 |
| s__Bifidobacterium_adolescentis      | s__Senegalimassilia_anaerobia             | -0.138096238 | 0.66864823  | 0.828923516 |
| s__Bifidobacterium_pseudocatenulatum | s__Senegalimassilia_anaerobia             | 0.281151444  | 0.376030625 | 0.702965264 |
| s__Bifidobacterium_catenulatum       | s__Slackia_isoflavoniconvertens           | -0.255166165 | 0.423469413 | 0.724609819 |
| s__Bifidobacterium_pseudocatenulatum | s__Slackia_isoflavoniconvertens           | -0.114349307 | 0.723442264 | 0.855903523 |
| s__Bifidobacterium_adolescentis      | s__Slackia_isoflavoniconvertens           | 0.120653325  | 0.708767837 | 0.844888813 |
| s__Bifidobacterium_bifidum           | s__Slackia_isoflavoniconvertens           | 0.277227723  | 0.383010078 | 0.706464564 |
| s__Bifidobacterium_longum            | s__Slackia_isoflavoniconvertens           | 0.312034462  | 0.323453354 | 0.660447962 |
| s__Bifidobacterium_longum            | s__Slackia_piriformis                     | -0.639692501 | 0.025084403 | 0.527898179 |
| s__Bifidobacterium_pseudocatenulatum | s__Slackia_piriformis                     | -0.525320086 | 0.079446787 | 0.564498291 |
| s__Bifidobacterium_bifidum           | s__Slackia_piriformis                     | -0.307024383 | 0.33169446  | 0.660447962 |
| s__Bifidobacterium_adolescentis      | s__Slackia_piriformis                     | 0.462298782  | 0.130231626 | 0.598875359 |
| s__Bifidobacterium_catenulatum       | s__Slackia_piriformis                     | 0.527504379  | 0.077978868 | 0.564498291 |
| s__Bifidobacterium_pseudocatenulatum | s__Streptococcus_anginosus                | -0.35564338  | 0.256568192 | 0.645261321 |
| s__Bifidobacterium_catenulatum       | s__Streptococcus_anginosus                | -0.243492377 | 0.445692547 | 0.724609819 |
| s__Bifidobacterium_bifidum           | s__Streptococcus_anginosus                | -0.20785649  | 0.516822372 | 0.734984411 |
| s__Bifidobacterium_longum            | s__Streptococcus_anginosus                | 0.043671315  | 0.892800448 | 0.941362816 |

|                                      |                                |              |             |             |
|--------------------------------------|--------------------------------|--------------|-------------|-------------|
| s__Bifidobacterium_adolescentis      | s__Streptococcus_anginosus     | 0.480384461  | 0.113937412 | 0.596315484 |
| s__Bifidobacterium_adolescentis      | s__Streptococcus_parasanguinis | -0.005375567 | 0.986771575 | 0.989914159 |
| s__Bifidobacterium_longum            | s__Streptococcus_parasanguinis | 0.107511345  | 0.739456692 | 0.865102537 |
| s__Bifidobacterium_catenulatum       | s__Streptococcus_parasanguinis | 0.185825406  | 0.56310666  | 0.777124113 |
| s__Bifidobacterium_pseudocatenulatum | s__Streptococcus_parasanguinis | 0.295492548  | 0.351090407 | 0.669943949 |
| s__Bifidobacterium_bifidum           | s__Streptococcus_parasanguinis | 0.316618895  | 0.316011737 | 0.660447962 |
| s__Bifidobacterium_longum            | s__Streptococcus_sp_A12        | -0.393041832 | 0.206255757 | 0.645261321 |
| s__Bifidobacterium_pseudocatenulatum | s__Streptococcus_sp_A12        | -0.35564338  | 0.256568192 | 0.645261321 |
| s__Bifidobacterium_bifidum           | s__Streptococcus_sp_A12        | -0.20785649  | 0.516822372 | 0.734984411 |
| s__Bifidobacterium_adolescentis      | s__Streptococcus_sp_A12        | 0.393041832  | 0.206255757 | 0.645261321 |
| s__Bifidobacterium_catenulatum       | s__Streptococcus_sp_A12        | 0.535683229  | 0.07264704  | 0.564498291 |
| s__Bifidobacterium_longum            | s__Sutterella_parvirubra       | -0.392416408 | 0.207043295 | 0.645261321 |
| s__Bifidobacterium_catenulatum       | s__Sutterella_parvirubra       | -0.359662076 | 0.250847879 | 0.645261321 |
| s__Bifidobacterium_bifidum           | s__Sutterella_parvirubra       | -0.307024383 | 0.33169446  | 0.660447962 |
| s__Bifidobacterium_adolescentis      | s__Sutterella_parvirubra       | -0.172018152 | 0.59293728  | 0.795634689 |
| s__Bifidobacterium_pseudocatenulatum | s__Sutterella_parvirubra       | 0.481543412  | 0.1129417   | 0.596315484 |
| s__Bifidobacterium_pseudocatenulatum | s__Sutterella_wadsworthensis   | -0.383733727 | 0.218165724 | 0.645261321 |
| s__Bifidobacterium_adolescentis      | s__Sutterella_wadsworthensis   | 0.0485203    | 0.88096859  | 0.941362816 |
| s__Bifidobacterium_longum            | s__Sutterella_wadsworthensis   | 0.257530822  | 0.419035507 | 0.724609819 |
| s__Bifidobacterium_bifidum           | s__Sutterella_wadsworthensis   | 0.60842636   | 0.035792539 | 0.564498291 |
| s__Bifidobacterium_catenulatum       | s__Sutterella_wadsworthensis   | 0.857366364  | 0.000364102 | 0.050974298 |
| s__Bifidobacterium_catenulatum       | s__Veillonella_atypica         | -0.556726179 | 0.060090882 | 0.564498291 |
| s__Bifidobacterium_bifidum           | s__Veillonella_atypica         | -0.475247525 | 0.118420573 | 0.596315484 |
| s__Bifidobacterium_longum            | s__Veillonella_atypica         | -0.370280895 | 0.236096162 | 0.645261321 |
| s__Bifidobacterium_pseudocatenulatum | s__Veillonella_atypica         | -0.067762553 | 0.834257343 | 0.914027432 |
| s__Bifidobacterium_adolescentis      | s__Veillonella_atypica         | 0.257948489  | 0.418254744 | 0.724609819 |
| s__Bifidobacterium_longum            | s__Veillonella_dispar          | -0.392416408 | 0.207043295 | 0.645261321 |
| s__Bifidobacterium_catenulatum       | s__Veillonella_dispar          | -0.359662076 | 0.250847879 | 0.645261321 |
| s__Bifidobacterium_bifidum           | s__Veillonella_dispar          | -0.307024383 | 0.33169446  | 0.660447962 |
| s__Bifidobacterium_adolescentis      | s__Veillonella_dispar          | -0.172018152 | 0.59293728  | 0.795634689 |
| s__Bifidobacterium_pseudocatenulatum | s__Veillonella_dispar          | 0.481543412  | 0.1129417   | 0.596315484 |
| s__Bifidobacterium_adolescentis      | s__Veillonella_parvula         | -0.089575938 | 0.781900627 | 0.886763988 |
| s__Bifidobacterium_pseudocatenulatum | s__Veillonella_parvula         | 0.085485236  | 0.791662547 | 0.893012363 |
| s__Bifidobacterium_longum            | s__Veillonella_parvula         | 0.186616537  | 0.561416013 | 0.775640544 |
| s__Bifidobacterium_bifidum           | s__Veillonella_parvula         | 0.293110509  | 0.355170478 | 0.670936735 |
| s__Bifidobacterium_catenulatum       | s__Veillonella_parvula         | 0.553542362  | 0.061885779 | 0.564498291 |
| s__Bifidobacterium_longum            | s__Veillonella_rogosae         | -0.392416408 | 0.207043295 | 0.645261321 |
| s__Bifidobacterium_catenulatum       | s__Veillonella_rogosae         | -0.359662076 | 0.250847879 | 0.645261321 |
| s__Bifidobacterium_bifidum           | s__Veillonella_rogosae         | -0.307024383 | 0.33169446  | 0.660447962 |
| s__Bifidobacterium_adolescentis      | s__Veillonella_rogosae         | -0.172018152 | 0.59293728  | 0.795634689 |
| s__Bifidobacterium_pseudocatenulatum | s__Veillonella_rogosae         | 0.481543412  | 0.1129417   | 0.596315484 |
