# Supplementary material for: Tomato seed extract promotes health of the gut microbiota and demonstrates a potential new way to valorize tomato waste
Source: PubMed Central journal article supplement (PMC11020900; doi:10.1371/journal.pone.0301381), 2024-04-16
Supplement: pone.0301381.s008.pdf [file pone.0301381.s008.pdf]

| chem       | variable                                   | Spearman   | pval       | padj       |
|------------|--------------------------------------------|------------|------------|------------|
| Propionate | s__Clostridiales_unclassified_SGB15145     | 0.6241685  | 0.03005952 | 0.83240946 |
| Propionate | s__Blautia_glucerasea                      | 0.6058106  | 0.03681569 | 0.83240946 |
| Propionate | s__Enterocloster_aldensis                  | 0.55365778 | 0.06182007 | 0.83240946 |
| Propionate | s__Agathobaculum_butyriciproducens         | 0.53026379 | 0.07615107 | 0.83240946 |
| Propionate | s__Alistipes_sp_AF17_16                    | 0.49509468 | 0.1017243  | 0.83240946 |
| Propionate | s__Blautia_sp_AF19_10LB                    | 0.48038446 | 0.11393741 | 0.83240946 |
| Propionate | s__Clostridia_bacterium_UC5_1_1D1          | 0.48038446 | 0.11393741 | 0.83240946 |
| Propionate | s__Clostridium_innocuum                    | 0.48038446 | 0.11393741 | 0.83240946 |
| Propionate | s__Erysipelatoclostridium_amosum           | 0.48038446 | 0.11393741 | 0.83240946 |
| Propionate | s__Eubacterium_rectale                     | 0.48038446 | 0.11393741 | 0.83240946 |
| Propionate | s__Faecalicatena_orotica                   | 0.48038446 | 0.11393741 | 0.83240946 |
| Propionate | s__GGB6612_SGB9346                         | 0.48038446 | 0.11393741 | 0.83240946 |
| Propionate | s__Holdemania_filiformis                   | 0.48038446 | 0.11393741 | 0.83240946 |
| Propionate | s__Intestinimonas_gabonensis               | 0.48038446 | 0.11393741 | 0.83240946 |
| Propionate | s__Mediterraneibacter_glycyrrhizinilyticus | 0.48038446 | 0.11393741 | 0.83240946 |
| Propionate | s__Mediterraneibacter_sp_gm002             | 0.48038446 | 0.11393741 | 0.83240946 |
| Propionate | s__Neobittarella_massiliensis              | 0.48038446 | 0.11393741 | 0.83240946 |
| Propionate | s__Pseudoflavonifractor_capillosus         | 0.48038446 | 0.11393741 | 0.83240946 |
| Propionate | s__Alistipes_dispar                        | 0.43141058 | 0.16142307 | 0.83240946 |
| Propionate | s__Clostridium_sp_SN20                     | 0.42020641 | 0.17380988 | 0.83240946 |
| Propionate | s__Butyricimonas_paravirosa                | 0.41391868 | 0.18101499 | 0.83240946 |
| Propionate | s__Enterocloster_asparagiformis            | 0.40549584 | 0.19095409 | 0.83240946 |
| Propionate | s__Anaerostipes_caccae                     | 0.39469479 | 0.20418315 | 0.83240946 |
| Propionate | s__Intestinibacillus_massiliensis          | 0.38166527 | 0.22086747 | 0.83240946 |
| Propionate | s__Blautia_hominis                         | 0.35478744 | 0.2577963  | 0.83240946 |
| Propionate | s__GGB1387_SGB1895                         | 0.35478744 | 0.2577963  | 0.83240946 |
| Propionate | s__Intestinimonas_butyriciproducens        | 0.35478744 | 0.2577963  | 0.83240946 |
| Propionate | s__Phocaeicola_coprocola                   | 0.35478744 | 0.2577963  | 0.83240946 |
| Propionate | s__Phocaeicola_coprophilus                 | 0.35478744 | 0.2577963  | 0.83240946 |
| Propionate | s__Anaerobutyricum_hallii                  | 0.35090986 | 0.26340266 | 0.83240946 |
| Propionate | s__Eggerthella_lenta                       | 0.34805462 | 0.26757567 | 0.83240946 |
| Propionate | s__Streptococcus_parasanguinis             | 0.3440363  | 0.27351275 | 0.83240946 |
| Propionate | s__Eubacteriaceae_bacterium                | 0.3286763  | 0.29689637 | 0.83240946 |
| Propionate | s__Parabacteroides_distasonis              | 0.31468531 | 0.31947191 | 0.83240946 |
| Propionate | s__Lachnospiraceae_bacterium_NSJ_29        | 0.31208425 | 0.32337203 | 0.83240946 |
| Propionate | s__Hungatella_hathewayi                    | 0.31191988 | 0.32364057 | 0.83240946 |
| Propionate | s__Clostridia_unclassified_SGB4367         | 0.3056992  | 0.33389314 | 0.83240946 |
| Propionate | s__Clostridium_scindens                    | 0.3056992  | 0.33389314 | 0.83240946 |
| Propionate | s__GGB45432_SGB63101                       | 0.3056992  | 0.33389314 | 0.83240946 |
| Propionate | s__Raoultibacter_massiliensis              | 0.3056992  | 0.33389314 | 0.83240946 |
| Propionate | s__Bifidobacterium_pseudocatenulatum       | 0.29897972 | 0.3451627  | 0.83240946 |
| Propionate | s__Clostridia_unclassified_SGB4447         | 0.29028063 | 0.36005012 | 0.83240946 |
| Propionate | s__GGB6566_SGB9275                         | 0.29028063 | 0.36005012 | 0.83240946 |
| Propionate | s__Bifidobacterium_adolescentis            | 0.26573427 | 0.40397666 | 0.89300104 |
| Propionate | s__Bifidobacterium_longum                  | 0.26573427 | 0.40397666 | 0.89300104 |
| Propionate | s__Bacteroides_stercoris                   | 0.23135335 | 0.46937777 | 0.9391505  |

|            |                                          |            |            |           |
|------------|------------------------------------------|------------|------------|-----------|
| Propionate | s__Eisenbergiella_tayi                   | 0.22393984 | 0.48412385 | 0.9391505 |
| Propionate | s__Akkermansia_muciniphila               | 0.22020751 | 0.49162663 | 0.9391505 |
| Propionate | s__GGB3510_SGB4687                       | 0.21835657 | 0.49536676 | 0.9391505 |
| Propionate | s__Streptococcus_anginosus               | 0.21835657 | 0.49536676 | 0.9391505 |
| Propionate | s__GGB9730_SGB15291                      | 0.21111582 | 0.51011938 | 0.9391505 |
| Propionate | s__Bacteroides_faecis                    | 0.20802297 | 0.51647906 | 0.9391505 |
| Propionate | s__Bifidobacterium_bifidum               | 0.20802297 | 0.51647906 | 0.9391505 |
| Propionate | s__Bifidobacterium_catenulatum           | 0.18715193 | 0.5602731  | 0.9391505 |
| Propionate | s__Butyricimonas_virosa                  | 0.18357897 | 0.56791827 | 0.9391505 |
| Propionate | s__Adlercreutzia_equolifaciens           | 0.18127845 | 0.57286285 | 0.9391505 |
| Propionate | s__Prevotella_marseillensis              | 0.1747393  | 0.58701033 | 0.9391505 |
| Propionate | s__Bacteroides_clarus                    | 0.17440002 | 0.58774805 | 0.9391505 |
| Propionate | s__Phascolarctobacterium_faecium         | 0.16422255 | 0.61004275 | 0.9391505 |
| Propionate | s__Clostridium_symbiosum                 | 0.16049022 | 0.61829692 | 0.9391505 |
| Propionate | s__Parabacteroides_johnsonii             | 0.16049022 | 0.61829692 | 0.9391505 |
| Propionate | s__GGB1270_SGB1705                       | 0.15809746 | 0.62361004 | 0.9391505 |
| Propionate | s__Eggerthellaceae_unclassified_SGB14341 | 0.15589145 | 0.62852313 | 0.9391505 |
| Propionate | s__GGB1662_SGB2276                       | 0.15589145 | 0.62852313 | 0.9391505 |
| Propionate | s__GGB38171_SGB72433                     | 0.15589145 | 0.62852313 | 0.9391505 |
| Propionate | s__Bacteroides_salyersiae                | 0.14145562 | 0.66100841 | 0.9391505 |
| Propionate | s__Anaerotruncus_colihominis             | 0.13101394 | 0.68484871 | 0.9391505 |
| Propionate | s__Enterococcus_gilvus                   | 0.13101394 | 0.68484871 | 0.9391505 |
| Propionate | s__GGB3293_SGB4348                       | 0.13101394 | 0.68484871 | 0.9391505 |
| Propionate | s__GGB3537_SGB4727                       | 0.13101394 | 0.68484871 | 0.9391505 |
| Propionate | s__GGB9574_SGB14987                      | 0.13101394 | 0.68484871 | 0.9391505 |
| Propionate | s__Merdimonas_faecis                     | 0.13101394 | 0.68484871 | 0.9391505 |
| Propionate | s__Streptococcus_sp_A12                  | 0.13101394 | 0.68484871 | 0.9391505 |
| Propionate | s__Bacteroides_uniformis                 | 0.12587413 | 0.69971222 | 0.9391505 |
| Propionate | s__Butyricococcus_sp_AM29_23AC           | 0.11932633 | 0.71184944 | 0.9391505 |
| Propionate | s__Anaerotignum_faecicola                | 0.10917196 | 0.73555856 | 0.9391505 |
| Propionate | s__Alistipes_inops                       | 0.10213578 | 0.75211359 | 0.9391505 |
| Propionate | s__Anaerotignum_lactatifermentans        | 0.10213578 | 0.75211359 | 0.9391505 |
| Propionate | s__Collinsella_SGB14754                  | 0.10213578 | 0.75211359 | 0.9391505 |
| Propionate | s__Coproccoccus_eutactus                 | 0.10213578 | 0.75211359 | 0.9391505 |
| Propionate | s__Dialister_invisus                     | 0.10213578 | 0.75211359 | 0.9391505 |
| Propionate | s__GGB1689_SGB2321                       | 0.10213578 | 0.75211359 | 0.9391505 |
| Propionate | s__GGB9623_SGB15076                      | 0.10213578 | 0.75211359 | 0.9391505 |
| Propionate | s__Ruminococcaceae_unclassified_SGB15234 | 0.10213578 | 0.75211359 | 0.9391505 |
| Propionate | s__Alistipes_ihumii                      | 0.09357596 | 0.77238294 | 0.9391505 |
| Propionate | s__Alistipes_shahii                      | 0.09090909 | 0.78319691 | 0.9391505 |
| Propionate | s__Senegalimassilia_anaerobia            | 0.08957594 | 0.78190063 | 0.9391505 |
| Propionate | s__Veillonella_parvula                   | 0.08584361 | 0.79080622 | 0.9391505 |
| Propionate | s__Alistipes_indistinctus                | 0.08261054 | 0.7985392  | 0.9391505 |
| Propionate | s__GGB3343_SGB4423                       | 0.08063351 | 0.80327617 | 0.9391505 |
| Propionate | s__GGB9581_SGB14999                      | 0.07904873 | 0.80707771 | 0.9391505 |
| Propionate | s__Gordonibacter_pamelaeae               | 0.07904873 | 0.80707771 | 0.9391505 |
| Propionate | s__Slackia_isoflavoniconvertens          | 0.07904873 | 0.80707771 | 0.9391505 |

|            |                                        |             |            |            |
|------------|----------------------------------------|-------------|------------|------------|
| Propionate | s__Parabacteroides_merdae              | 0.07830421  | 0.80886497 | 0.9391505  |
| Propionate | s__Bilophila_wadsworthia               | 0.07746671  | 0.81087646 | 0.9391505  |
| Propionate | s__Fusicatenibacter_saccharivorans     | 0.07474493  | 0.81742073 | 0.9391505  |
| Propionate | s__Gemmiger_formicilis                 | 0.06993007  | 0.83444715 | 0.9391505  |
| Propionate | s__Phocaecicola_plebeius               | 0.05913124  | 0.85515799 | 0.9391505  |
| Propionate | s__Enterocloster_bolteae               | 0.05604212  | 0.86265976 | 0.9391505  |
| Propionate | s__Citrobacter_murlinae                | 0.04838011  | 0.88131037 | 0.9391505  |
| Propionate | s__Collinsella_massiliensis            | 0.04367131  | 0.89280045 | 0.9391505  |
| Propionate | s__Dialister_pneumosintes              | 0.04367131  | 0.89280045 | 0.9391505  |
| Propionate | s__GGB3746_SGB5089                     | 0.04367131  | 0.89280045 | 0.9391505  |
| Propionate | s__GGB51960_SGB72480                   | 0.04367131  | 0.89280045 | 0.9391505  |
| Propionate | s__Haemophilus_parainfluenzae          | 0.04367131  | 0.89280045 | 0.9391505  |
| Propionate | s__Lentisphaeria_bacterium             | 0.04367131  | 0.89280045 | 0.9391505  |
| Propionate | s__Paraclostridium_bifermentans        | 0.04367131  | 0.89280045 | 0.9391505  |
| Propionate | s__Citrobacter_freundii                | 0.03671579  | 0.90980693 | 0.94720431 |
| Propionate | s__Faecalicatena_fissicatena           | 0.0322534   | 0.92073638 | 0.94720431 |
| Propionate | s__Anaerotruncus_massiliensis          | 0.03119199  | 0.92333796 | 0.94720431 |
| Propionate | s__Enterocloster_clostridioformis      | 0.02912322  | 0.92841057 | 0.94720431 |
| Propionate | s__GGB9633_SGB15091                    | 0.02912322  | 0.92841057 | 0.94720431 |
| Propionate | s__Clostridiales_bacterium_KLE1615     | 0.01075113  | 0.97354621 | 0.98527568 |
| Propionate | s__Clostridium_sp_AF20_17LB            | 0.00746466  | 0.9816313  | 0.98554218 |
| Propionate | s__GGB9644_SGB15121                    | -0.00832092 | 0.97952463 | 0.98554218 |
| Propionate | s__Dorea_sp_AF24_7LB                   | -0.01248138 | 0.96929049 | 0.9849242  |
| Propionate | s__Faecalicatena_contorta              | -0.02912322 | 0.92841057 | 0.94720431 |
| Propionate | s__Ruminococcus_bicirculans            | -0.02912322 | 0.92841057 | 0.94720431 |
| Propionate | s__Desulfovibrionaceae_bacterium       | -0.04300454 | 0.89442905 | 0.9391505  |
| Propionate | s__Enterococcus_avium                  | -0.04300454 | 0.89442905 | 0.9391505  |
| Propionate | s__Enterococcus_faecalis               | -0.04300454 | 0.89442905 | 0.9391505  |
| Propionate | s__Lacticaseibacillus_paracasei        | -0.04300454 | 0.89442905 | 0.9391505  |
| Propionate | s__Raoultella_ornithinolytica          | -0.04300454 | 0.89442905 | 0.9391505  |
| Propionate | s__Slackia_piriformis                  | -0.04300454 | 0.89442905 | 0.9391505  |
| Propionate | s__Eubacterium_sp_AM28_29              | -0.04367131 | 0.89280045 | 0.9391505  |
| Propionate | s__Bacteroides_finegoldii              | -0.04678798 | 0.88519312 | 0.9391505  |
| Propionate | s__Clostridiales_bacterium_1_7_47FAA   | -0.04838011 | 0.88131037 | 0.9391505  |
| Propionate | s__Escherichia_marmotae                | -0.04838011 | 0.88131037 | 0.9391505  |
| Propionate | s__Intestinimonas_massiliensis         | -0.06425264 | 0.84274543 | 0.9391505  |
| Propionate | s__Sutterella_wadsworthensis           | -0.06718195 | 0.83566032 | 0.9391505  |
| Propionate | s__Alistipes_onderdonkii               | -0.07042428 | 0.8278312  | 0.9391505  |
| Propionate | s__Allisonella_histaminiformans        | -0.08600908 | 0.79041091 | 0.9391505  |
| Propionate | s__Bacteroides_fragilis                | -0.08600908 | 0.79041091 | 0.9391505  |
| Propionate | s__Blautia_faecis                      | -0.08600908 | 0.79041091 | 0.9391505  |
| Propionate | s__GGB9633_SGB15090                    | -0.08600908 | 0.79041091 | 0.9391505  |
| Propionate | s__Phascolarctobacterium_succinatutens | -0.08600908 | 0.79041091 | 0.9391505  |
| Propionate | s__Phocaecicola_vulgatus               | -0.09090909 | 0.78319691 | 0.9391505  |
| Propionate | s__Bacteroides_cellulosilyticus        | -0.09254134 | 0.77484202 | 0.9391505  |
| Propionate | s__Clostridiales_bacterium             | -0.09610062 | 0.76639045 | 0.9391505  |
| Propionate | s__Phocaecicola_dorei                  | -0.09610062 | 0.76639045 | 0.9391505  |

|            |                                            |             |            |            |
|------------|--------------------------------------------|-------------|------------|------------|
| Propionate | s__Clostridiales_bacterium_Choco116        | -0.09676021 | 0.76482679 | 0.9391505  |
| Propionate | s__Clostridium_sp_AF15_49                  | -0.09676021 | 0.76482679 | 0.9391505  |
| Propionate | s__Eubacterium_callanderi                  | -0.09676021 | 0.76482679 | 0.9391505  |
| Propionate | s__GGB3256_SGB4303                         | -0.09676021 | 0.76482679 | 0.9391505  |
| Propionate | s__GGB6561_SGB9269                         | -0.09676021 | 0.76482679 | 0.9391505  |
| Propionate | s__Paraprevotella_clara                    | -0.09676021 | 0.76482679 | 0.9391505  |
| Propionate | s__Clostridium_sp_AM22_11AC                | -0.09985103 | 0.7575103  | 0.9391505  |
| Propionate | s__Acidaminococcaceae_unclassified_SGB5785 | -0.10096843 | 0.75486966 | 0.9391505  |
| Propionate | s__Lachnospira_eligens                     | -0.11014738 | 0.73327149 | 0.9391505  |
| Propionate | s__Ruminococcus_torques                    | -0.11389704 | 0.72449842 | 0.9391505  |
| Propionate | s__Candidatus_Cibiobacter_qucibialis       | -0.11888112 | 0.71618433 | 0.9391505  |
| Propionate | s__Clostridium_fessum                      | -0.11972128 | 0.71093186 | 0.9391505  |
| Propionate | s__Ektepia_gabavorous                      | -0.12065333 | 0.70876784 | 0.9391505  |
| Propionate | s__Alistipes_finegoldii                    | -0.1210156  | 0.70792724 | 0.9391505  |
| Propionate | s__Blautia_massiliensis                    | -0.12850528 | 0.69061696 | 0.9391505  |
| Propionate | s__Candidatus_Alloruminococcus_vanvlietii  | -0.13101394 | 0.68484871 | 0.9391505  |
| Propionate | s__Coproccoccus_comes                      | -0.13101394 | 0.68484871 | 0.9391505  |
| Propionate | s__GGB4651_SGB6438                         | -0.13101394 | 0.68484871 | 0.9391505  |
| Propionate | s__GGB9694_SGB15203                        | -0.13101394 | 0.68484871 | 0.9391505  |
| Propionate | s__Enterocloster_lavalensis                | -0.13777162 | 0.66938801 | 0.9391505  |
| Propionate | s__Ruthenibacterium_lactatiformans         | -0.13777162 | 0.66938801 | 0.9391505  |
| Propionate | s__Barnesiella_intestinihominis            | -0.13809624 | 0.66864823 | 0.9391505  |
| Propionate | s__Escherichia_coli                        | -0.14010529 | 0.66407577 | 0.9391505  |
| Propionate | s__Alistipes_communis                      | -0.14711056 | 0.64821523 | 0.9391505  |
| Propionate | s__Ruminococcus_sp_NSJ_71                  | -0.153937   | 0.63288755 | 0.9391505  |
| Propionate | s__Enterocloster_citroniae                 | -0.16783217 | 0.60372765 | 0.9391505  |
| Propionate | s__Bittarella_massiliensis                 | -0.17402731 | 0.5885589  | 0.9391505  |
| Propionate | s__Dorea_longicatena                       | -0.18213688 | 0.57101578 | 0.9391505  |
| Propionate | s__GGB9634_SGB15093                        | -0.18276929 | 0.56965659 | 0.9391505  |
| Propionate | s__Ruminococcus_bromii                     | -0.18288421 | 0.56940973 | 0.9391505  |
| Propionate | s__Anaerotruncus_rubiinfantis              | -0.18357897 | 0.56791827 | 0.9391505  |
| Propionate | s__Coriobacteriia_bacterium                | -0.19494992 | 0.54373511 | 0.9391505  |
| Propionate | s__Eubacterium_ramulus                     | -0.20802297 | 0.51647906 | 0.9391505  |
| Propionate | s__GGB9758_SGB15368                        | -0.21753414 | 0.49703272 | 0.9391505  |
| Propionate | s__Angelakisella_massiliensis              | -0.21835657 | 0.49536676 | 0.9391505  |
| Propionate | s__Blautia_SGB4831                         | -0.21835657 | 0.49536676 | 0.9391505  |
| Propionate | s__GGB1247_SGB1668                         | -0.21835657 | 0.49536676 | 0.9391505  |
| Propionate | s__GGB34228_SGB72916                       | -0.21835657 | 0.49536676 | 0.9391505  |
| Propionate | s__GGB3817_SGB5182                         | -0.21835657 | 0.49536676 | 0.9391505  |
| Propionate | s__Clostridium_phoceensis                  | -0.24633383 | 0.44023265 | 0.9391505  |
| Propionate | s__Dysosmobacter_sp_NSJ_60                 | -0.24783161 | 0.43736769 | 0.9391505  |
| Propionate | s__Coriobacteriia_unclassified_SGB14764    | -0.24962757 | 0.43394431 | 0.9391505  |
| Propionate | s__Collinsella_aerofaciens                 | -0.27272727 | 0.39123275 | 0.88027368 |
| Propionate | s__Alistipes_putredinis                    | -0.27972028 | 0.37870923 | 0.85977231 |
| Propionate | s__Ruminococcaceae_bacterium               | -0.2845474  | 0.37004366 | 0.84773639 |
| Propionate | s__Desulfovibrio_piger                     | -0.29028063 | 0.36005012 | 0.83240946 |
| Propionate | s__Enterococcus_faecium                    | -0.29028063 | 0.36005012 | 0.83240946 |

|            |                                           |             |            |            |
|------------|-------------------------------------------|-------------|------------|------------|
| Propionate | s__Hafnia_alvei                           | -0.29028063 | 0.36005012 | 0.83240946 |
| Propionate | s__Intestinibacillus_sp_Marseille_P6563   | -0.29028063 | 0.36005012 | 0.83240946 |
| Propionate | s__Mediterraneibacter_butyricigenes       | -0.29028063 | 0.36005012 | 0.83240946 |
| Propionate | s__Sutterella_parvirubra                  | -0.29028063 | 0.36005012 | 0.83240946 |
| Propionate | s__Veillonella_dispar                     | -0.29028063 | 0.36005012 | 0.83240946 |
| Propionate | s__Veillonella_rogosae                    | -0.29028063 | 0.36005012 | 0.83240946 |
| Propionate | s__Oscillibacter_sp_ER4                   | -0.29542044 | 0.35121356 | 0.83240946 |
| Propionate | s__Anaerostipes_hadrus                    | -0.3056992  | 0.33389314 | 0.83240946 |
| Propionate | s__Eisenbergiella_massiliensis            | -0.3056992  | 0.33389314 | 0.83240946 |
| Propionate | s__GGB3005_SGB3996                        | -0.3056992  | 0.33389314 | 0.83240946 |
| Propionate | s__Lentisphaeria_unclassified_SGB9198     | -0.3056992  | 0.33389314 | 0.83240946 |
| Propionate | s__Prevotella_lascolaii                   | -0.3056992  | 0.33389314 | 0.83240946 |
| Propionate | s__Rhodobacteraceae_unclassified_SGB53807 | -0.3056992  | 0.33389314 | 0.83240946 |
| Propionate | s__Lacrimispora_amygdalina                | -0.32867133 | 0.29738508 | 0.83240946 |
| Propionate | s__Flavonifractor_plautii                 | -0.33099412 | 0.29329806 | 0.83240946 |
| Propionate | s__Clostridium_methylpentosum             | -0.33328517 | 0.28976562 | 0.83240946 |
| Propionate | s__Roseburia_faecis                       | -0.33355234 | 0.28935525 | 0.83240946 |
| Propionate | s__Clostridia_bacterium                   | -0.34080348 | 0.27834368 | 0.83240946 |
| Propionate | s__Bacteroidaceae_bacterium               | -0.35478744 | 0.2577963  | 0.83240946 |
| Propionate | s__Bacteroides_xylanisolvens              | -0.35478744 | 0.2577963  | 0.83240946 |
| Propionate | s__Clostridiaceae_bacterium_OM08_6BH      | -0.35478744 | 0.2577963  | 0.83240946 |
| Propionate | s__Clostridium_sp_AM33_3                  | -0.35478744 | 0.2577963  | 0.83240946 |
| Propionate | s__Coproccoccus_catus                     | -0.35478744 | 0.2577963  | 0.83240946 |
| Propionate | s__Enterococcus_casseliflavus             | -0.35478744 | 0.2577963  | 0.83240946 |
| Propionate | s__GGB1379_SGB1880                        | -0.35478744 | 0.2577963  | 0.83240946 |
| Propionate | s__GGB9581_SGB79823                       | -0.35478744 | 0.2577963  | 0.83240946 |
| Propionate | s__Parabacteroides_acidifaciens           | -0.35478744 | 0.2577963  | 0.83240946 |
| Propionate | s__Parasutterella_excrementihominis       | -0.35478744 | 0.2577963  | 0.83240946 |
| Propionate | s__Peptococcaceae_bacterium               | -0.35478744 | 0.2577963  | 0.83240946 |
| Propionate | s__Firmicutes_bacterium_AF16_15           | -0.35797899 | 0.25323444 | 0.83240946 |
| Propionate | s__GGB2980_SGB3962                        | -0.35797899 | 0.25323444 | 0.83240946 |
| Propionate | s__Faecalibacterium_prausnitzii           | -0.35916384 | 0.25155299 | 0.83240946 |
| Propionate | s__Phocaecicola_massiliensis              | -0.36077113 | 0.24928251 | 0.83240946 |
| Propionate | s__GGB9615_SGB15053                       | -0.38166527 | 0.22086747 | 0.83240946 |
| Propionate | s__Blautia_sp_MSK_20_85                   | -0.38551584 | 0.21585406 | 0.83240946 |
| Propionate | s__Odoribacter_splanchnicus               | -0.38733355 | 0.21351155 | 0.83240946 |
| Propionate | s__Blautia_obeum                          | -0.39241641 | 0.20704329 | 0.83240946 |
| Propionate | s__Faecalibacterium_SGB15346              | -0.39241641 | 0.20704329 | 0.83240946 |
| Propionate | s__Akkermansia_sp_KLE1605                 | -0.39304183 | 0.20625576 | 0.83240946 |
| Propionate | s__GGB9635_SGB15106                       | -0.39304183 | 0.20625576 | 0.83240946 |
| Propionate | s__Oscillibacter_sp_NSJ_62                | -0.39304183 | 0.20625576 | 0.83240946 |
| Propionate | s__Schaalia_turicensis                    | -0.39304183 | 0.20625576 | 0.83240946 |
| Propionate | s__Veillonella_atypica                    | -0.39940411 | 0.19834825 | 0.83240946 |
| Propionate | s__GGB9632_SGB15089                       | -0.40309172 | 0.19385155 | 0.83240946 |
| Propionate | s__Methanobrevibacter_smithii             | -0.40316754 | 0.19375976 | 0.83240946 |
| Propionate | s__Clostridiaceae_bacterium               | -0.41331486 | 0.18171654 | 0.83240946 |
| Propionate | s__Blautia_wexlerae                       | -0.45775783 | 0.13454859 | 0.83240946 |

|            |                                        |             |            |            |
|------------|----------------------------------------|-------------|------------|------------|
| Propionate | s__Bacteroides_caccae                  | -0.46270671 | 0.1298483  | 0.83240946 |
| Propionate | s__Bacteroides_thetaiotaomicron        | -0.46982527 | 0.12327702 | 0.83240946 |
| Propionate | s__Dysosmobacter_welbionis             | -0.47338455 | 0.1200747  | 0.83240946 |
| Propionate | s__Clostridiaceae_unclassified_SGB4769 | -0.48038446 | 0.11393741 | 0.83240946 |
| Propionate | s__Clostridiales_unclassified_SGB15150 | -0.48038446 | 0.11393741 | 0.83240946 |
| Propionate | s__GGB58485_SGB80143                   | -0.48038446 | 0.11393741 | 0.83240946 |
| Propionate | s__Peptoniphilus_senegalensis          | -0.48038446 | 0.11393741 | 0.83240946 |
| Propionate | s__GGB9621_SGB15073                    | -0.49992775 | 0.09791088 | 0.83240946 |
| Propionate | s__Blautia_SGB4815                     | -0.5034156  | 0.09521921 | 0.83240946 |
| Propionate | s__Bacteroides_nordii                  | -0.51402112 | 0.08734129 | 0.83240946 |
| Propionate | s__Eggerthellaceae_bacterium           | -0.5337233  | 0.07390122 | 0.83240946 |
| Propionate | s__Lacrimispora_saccharolytica         | -0.6396925  | 0.0250844  | 0.83240946 |
| Propionate | s__Dorea_sp_AF36_15AT                  | -0.69479674 | 0.01214864 | 0.61229163 |
| Propionate | s__GGB9619_SGB15067                    | -0.71061151 | 0.0095911  | 0.61229163 |
| Propionate | s__Bacteroides_ovatus                  | -0.72727273 | 0.01000092 | 0.61229163 |
| Propionate | s__Lachnospiraceae_bacterium           | -0.73241253 | 0.00675165 | 0.61229163 |
| Propionate | s__Dorea_formicigenerans               | -0.82517483 | 0.0017186  | 0.43308611 |
