# Supplementary material for: Tomato seed extract promotes health of the gut microbiota and demonstrates a potential new way to valorize tomato waste
Source: PubMed Central journal article supplement (PMC11020900; doi:10.1371/journal.pone.0301381), 2024-04-16
Supplement: pone.0301381.s009.pdf [file pone.0301381.s009.pdf]

| sample    | Timepoint | Donor | Treatment     | pH   | Gas.productio | Acetate | Propionate | Butyrate | Valerate | BCFA | total.SCFA | cells/mL  | Shannon     | ObservedTaxa | DonorAge | DonorGender |
|-----------|-----------|-------|---------------|------|---------------|---------|------------|----------|----------|------|------------|-----------|-------------|--------------|----------|-------------|
| sample_1  | 0h        |       | 1 Inoculum    | 6.65 | 0             | 0.42    | 0.24       | 0.27     | 0.14     | 0.35 | 1.52       | 285000000 | 3.599665132 | 96           | 29       | F           |
| sample_2  | 0h        |       | 2 Inoculum    | 6.66 | 0             | 0.43    | 0.24       | 0.22     | 0.14     | 0.21 | 1.34       | 130000000 | 3.577744139 | 73           | 25       | F           |
| sample_3  | 0h        |       | 3 Inoculum    | 6.64 | 0             | 0.42    | 0.25       | 0.21     | 0        | 0    | 0.88       | 209000000 | 3.98497536  | 118          | 40       | F           |
| sample_4  | 0h        |       | 4 Inoculum    | 6.65 | 0             | 0.39    | 0.23       | 0.2      | 0.14     | 0.09 | 1.15       | 182000000 | 3.651343787 | 109          | 38       | M           |
| sample_5  | 0h        |       | 5 Inoculum    | 6.64 | 0             | 0.41    | 0.26       | 0.18     | 0        | 0.22 | 1.17       | 119000000 | 3.536877279 | 83           | 30       | M           |
| sample_6  | 0h        |       | 6 Inoculum    | 6.64 | 0             | 0.65    | 0.25       | 0.29     | 0.15     | 0.09 | 1.52       | 456000000 | 3.490109306 | 78           | 31       | M           |
| sample_7  | 48h       |       | 1 NSC         | 6.52 | 112.65        | 15.29   | 4.49       | 2.26     | 0.87     | 1.73 | 24.74      | 574000000 | 3.407036801 | 97           | 29       | F           |
| sample_8  | 48h       |       | 1 Tomato seed | 6.31 | 148.51        | 25.33   | 7.6        | 2.24     | 0.51     | 1.43 | 37.21      | 467000000 | 2.58093543  | 55           | 29       | F           |
| sample_19 | 48h       |       | 2 NSC         | 6.54 | 117.66        | 12.18   | 4.63       | 1.56     | 0.71     | 0.72 | 19.9       | 423000000 | 3.244210294 | 95           | 25       | F           |
| sample_20 | 48h       |       | 2 Tomato seed | 6.38 | 234.34        | 18.75   | 6.59       | 2.74     | 0.18     | 0.51 | 28.78      | 325000000 | 2.487017004 | 77           | 25       | F           |
| sample_31 | 48h       |       | 3 NSC         | 6.52 | 118.16        | 13.47   | 4.42       | 1.89     | 0.86     | 0.93 | 21.69      | 457000000 | 3.410344194 | 90           | 40       | F           |
| sample_32 | 48h       |       | 3 Tomato seed | 6.32 | 194.74        | 24.31   | 8          | 1.5      | 0.71     | 1.39 | 35.91      | 377000000 | 2.888223398 | 52           | 40       | F           |
| sample_43 | 48h       |       | 4 NSC         | 6.51 | 97.23         | 13.36   | 4.76       | 2.37     | 0.9      | 1.62 | 23.12      | 386000000 | 3.483607793 | 97           | 38       | M           |
| sample_44 | 48h       |       | 4 Tomato seed | 6.31 | 202.95        | 22.63   | 7.77       | 3.74     | 0.87     | 0.93 | 36.06      | 373000000 | 3.028456615 | 110          | 38       | M           |
| sample_55 | 48h       |       | 5 NSC         | 6.5  | 146.74        | 13.47   | 5.15       | 2.91     | 0.75     | 1.1  | 23.48      | 357000000 | 3.354148938 | 69           | 30       | M           |
| sample_56 | 48h       |       | 5 Tomato seed | 6.28 | 182.56        | 24.3    | 8.1        | 4.48     | 0.8      | 1.13 | 38.91      | 425000000 | 3.180675297 | 108          | 30       | M           |
| sample_67 | 48h       |       | 6 NSC         | 6.53 | 133.48        | 11.72   | 4.09       | 1.56     | 0.15     | 0.82 | 18.44      | 223000000 | 2.971432811 | 84           | 31       | M           |
| sample_68 | 48h       |       | 6 Tomato seed | 6.34 | 205.13        | 21.51   | 6.45       | 1.03     | 0.15     | 1.2  | 30.44      | 240000000 | 2.565816107 | 85           | 31       | M           |
